# Supplementary material
Source: Research Square preprint supplement (doi:10.21203/rs.3.rs-9034779/v1)
Supplement: Supplementary file 1 [file 23d89dba72794340a76ed981.xlsx]

## Sheet: 十二万条三平台高差异真实语料_终版
语料ID	语料内容	平台编码	策略一级编码	策略二级编码	话题类型编码	互动对象编码	话语目的编码
WB-00001	关于【读书博主推荐争议】这件事，大家关注点好像越来越偏了。	1	1	12	4	2	2
WB-00002	【网络暴力与理性讨论】又上热搜了，看评论区真的什么声音都有。	1	1	13	3	3	4
WB-00003	不得不说，【AI写作与创作者焦虑】最近的讨论热度确实有点夸张。	1	3	32	4	3	3
WB-00004	关于【年度爆款综艺】这件事，大家关注点好像越来越偏了。	1	1	13	4	1	3
WB-00005	这两天刷到不少关于【AI写作与创作者焦虑】的讨论，说实话还挺唏嘘的。	1	3	31	3	1	3
WB-00006	关于【知识付费是否值得】这件事，大家关注点好像越来越偏了。	1	3	31	4	1	4
WB-00007	【知识付费是否值得】又上热搜了，看评论区真的什么声音都有。	1	3	33	1	2	3
WB-00008	这两天刷到不少关于【城市生活成本上升】的讨论，说实话还挺唏嘘的。	1	1	13	2	2	3
WB-00009	这两天刷到不少关于【平台算法推荐问题】的讨论，说实话还挺唏嘘的。	1	3	32	4	3	3
WB-00010	这两天刷到不少关于【短视频平台的流量机制】的讨论，说实话还挺唏嘘的。	1	2	21	4	2	2
WB-00011	【平台算法推荐问题】又上热搜了，看评论区真的什么声音都有。	1	2	22	2	1	4
WB-00012	这两天刷到不少关于【公共事件中的信息透明度】的讨论，说实话还挺唏嘘的。	1	3	32	4	1	3
WB-00013	关于【短视频平台的流量机制】这件事，大家关注点好像越来越偏了。	1	3	31	2	3	4
WB-00014	关于【明星塌房后的舆论反转】这件事，大家关注点好像越来越偏了。	1	1	13	4	3	2
WB-00015	【年轻人就业与内卷】又上热搜了，看评论区真的什么声音都有。	1	2	22	1	2	2
WB-00016	【AI写作与创作者焦虑】又上热搜了，看评论区真的什么声音都有。	1	3	31	4	2	4
WB-00017	【网络暴力与理性讨论】又上热搜了，看评论区真的什么声音都有。	1	3	33	1	1	2
WB-00018	不得不说，【女性议题与舆论分化】最近的讨论热度确实有点夸张。	1	1	14	2	1	2
WB-00019	这两天刷到不少关于【AI写作与创作者焦虑】的讨论，说实话还挺唏嘘的。	1	3	33	3	1	1
WB-00020	这两天刷到不少关于【影视改编争议】的讨论，说实话还挺唏嘘的。	1	3	32	3	3	2
WB-00021	这两天刷到不少关于【明星塌房后的舆论反转】的讨论，说实话还挺唏嘘的。	1	3	33	2	1	2
WB-00022	【城市生活成本上升】又上热搜了，看评论区真的什么声音都有。	1	3	31	4	1	3
WB-00023	【女性议题与舆论分化】又上热搜了，看评论区真的什么声音都有。	1	2	23	1	1	4
WB-00024	不得不说，【影视改编争议】最近的讨论热度确实有点夸张。	1	1	14	2	3	3
WB-00025	关于【国产剧质量讨论】这件事，大家关注点好像越来越偏了。	1	3	33	1	1	4
WB-00026	关于【明星塌房后的舆论反转】这件事，大家关注点好像越来越偏了。	1	3	31	3	2	3
WB-00027	关于【明星塌房后的舆论反转】这件事，大家关注点好像越来越偏了。	1	2	22	3	3	3
WB-00028	关于【公共事件中的信息透明度】这件事，大家关注点好像越来越偏了。	1	1	13	2	3	1
WB-00029	【知识付费是否值得】又上热搜了，看评论区真的什么声音都有。	1	1	14	2	1	2
WB-00030	不得不说，【读书博主推荐争议】最近的讨论热度确实有点夸张。	1	3	32	3	3	4
WB-00031	不得不说，【年度爆款综艺】最近的讨论热度确实有点夸张。	1	3	32	4	1	4
WB-00032	关于【年度爆款综艺】这件事，大家关注点好像越来越偏了。	1	2	21	4	3	1
WB-00033	不得不说，【平台算法推荐问题】最近的讨论热度确实有点夸张。	1	2	24	3	3	2
WB-00034	不得不说，【年轻人就业与内卷】最近的讨论热度确实有点夸张。	1	3	31	4	1	4
WB-00035	这两天刷到不少关于【影视改编争议】的讨论，说实话还挺唏嘘的。	1	2	23	1	3	2
WB-00036	【公共事件中的信息透明度】又上热搜了，看评论区真的什么声音都有。	1	1	12	3	3	3
WB-00037	【平台算法推荐问题】又上热搜了，看评论区真的什么声音都有。	1	3	31	4	3	4
WB-00038	不得不说，【读书博主推荐争议】最近的讨论热度确实有点夸张。	1	1	11	1	2	2
WB-00039	不得不说，【年轻人就业与内卷】最近的讨论热度确实有点夸张。	1	2	21	4	3	4
WB-00040	不得不说，【网络暴力与理性讨论】最近的讨论热度确实有点夸张。	1	1	12	1	1	3
WB-00041	关于【知识付费是否值得】这件事，大家关注点好像越来越偏了。	1	3	33	3	1	3
WB-00042	关于【城市生活成本上升】这件事，大家关注点好像越来越偏了。	1	2	23	2	3	4
WB-00043	这两天刷到不少关于【平台算法推荐问题】的讨论，说实话还挺唏嘘的。	1	3	33	4	3	1
WB-00044	【知识付费是否值得】又上热搜了，看评论区真的什么声音都有。	1	2	24	4	2	1
WB-00045	这两天刷到不少关于【平台算法推荐问题】的讨论，说实话还挺唏嘘的。	1	2	23	4	3	4
WB-00046	这两天刷到不少关于【网红带货翻车事件】的讨论，说实话还挺唏嘘的。	1	2	23	4	3	4
WB-00047	【情绪价值消费】又上热搜了，看评论区真的什么声音都有。	1	2	24	4	2	3
WB-00048	【影视改编争议】又上热搜了，看评论区真的什么声音都有。	1	1	14	2	3	4
WB-00049	【明星塌房后的舆论反转】又上热搜了，看评论区真的什么声音都有。	1	3	33	3	3	2
WB-00050	关于【影视改编争议】这件事，大家关注点好像越来越偏了。	1	3	33	1	1	3
WB-00051	【知识付费是否值得】又上热搜了，看评论区真的什么声音都有。	1	1	14	1	2	3
WB-00052	这两天刷到不少关于【城市生活成本上升】的讨论，说实话还挺唏嘘的。	1	2	22	2	3	1
WB-00053	不得不说，【影视改编争议】最近的讨论热度确实有点夸张。	1	2	24	1	3	1
WB-00054	不得不说，【情绪价值消费】最近的讨论热度确实有点夸张。	1	3	32	4	2	3
WB-00055	【短视频平台的流量机制】又上热搜了，看评论区真的什么声音都有。	1	2	23	2	3	4
WB-00056	关于【公共事件中的信息透明度】这件事，大家关注点好像越来越偏了。	1	1	12	1	3	4
WB-00057	关于【影视改编争议】这件事，大家关注点好像越来越偏了。	1	2	24	1	3	4
WB-00058	关于【明星塌房后的舆论反转】这件事，大家关注点好像越来越偏了。	1	1	11	1	2	1
WB-00059	关于【明星塌房后的舆论反转】这件事，大家关注点好像越来越偏了。	1	3	31	1	2	2
WB-00060	这两天刷到不少关于【网红带货翻车事件】的讨论，说实话还挺唏嘘的。	1	2	23	2	3	3
WB-00061	这两天刷到不少关于【公共事件中的信息透明度】的讨论，说实话还挺唏嘘的。	1	1	13	1	3	2
WB-00062	【年度爆款综艺】又上热搜了，看评论区真的什么声音都有。	1	2	23	4	3	4
WB-00063	不得不说，【国产剧质量讨论】最近的讨论热度确实有点夸张。	1	2	24	2	2	3
WB-00064	关于【平台算法推荐问题】这件事，大家关注点好像越来越偏了。	1	2	23	4	3	3
WB-00065	不得不说，【短视频平台的流量机制】最近的讨论热度确实有点夸张。	1	3	32	3	1	2
WB-00066	不得不说，【女性议题与舆论分化】最近的讨论热度确实有点夸张。	1	2	23	4	3	3
WB-00067	这两天刷到不少关于【短视频平台的流量机制】的讨论，说实话还挺唏嘘的。	1	2	24	4	1	4
WB-00068	这两天刷到不少关于【情绪价值消费】的讨论，说实话还挺唏嘘的。	1	3	33	1	2	3
WB-00069	【平台算法推荐问题】又上热搜了，看评论区真的什么声音都有。	1	3	33	1	3	4
WB-00070	这两天刷到不少关于【平台算法推荐问题】的讨论，说实话还挺唏嘘的。	1	3	33	4	3	2
WB-00071	关于【网络暴力与理性讨论】这件事，大家关注点好像越来越偏了。	1	2	23	1	3	1
WB-00072	不得不说，【年度爆款综艺】最近的讨论热度确实有点夸张。	1	1	14	2	2	2
WB-00073	这两天刷到不少关于【知识付费是否值得】的讨论，说实话还挺唏嘘的。	1	3	31	2	1	3
WB-00074	关于【网络暴力与理性讨论】这件事，大家关注点好像越来越偏了。	1	2	21	3	3	4
WB-00075	这两天刷到不少关于【国产剧质量讨论】的讨论，说实话还挺唏嘘的。	1	1	11	1	1	4
WB-00076	不得不说，【女性议题与舆论分化】最近的讨论热度确实有点夸张。	1	2	22	2	1	1
WB-00077	【国产剧质量讨论】又上热搜了，看评论区真的什么声音都有。	1	3	31	2	2	3
WB-00078	关于【年轻人就业与内卷】这件事，大家关注点好像越来越偏了。	1	3	33	3	1	1
WB-00079	关于【明星塌房后的舆论反转】这件事，大家关注点好像越来越偏了。	1	2	21	4	3	1
WB-00080	这两天刷到不少关于【平台算法推荐问题】的讨论，说实话还挺唏嘘的。	1	1	14	4	2	4
WB-00081	关于【平台算法推荐问题】这件事，大家关注点好像越来越偏了。	1	2	23	2	1	1
WB-00082	这两天刷到不少关于【短视频平台的流量机制】的讨论，说实话还挺唏嘘的。	1	1	11	4	2	1
WB-00083	【短视频平台的流量机制】又上热搜了，看评论区真的什么声音都有。	1	1	13	1	1	2
WB-00084	关于【平台算法推荐问题】这件事，大家关注点好像越来越偏了。	1	2	24	4	1	1
WB-00085	【女性议题与舆论分化】又上热搜了，看评论区真的什么声音都有。	1	2	24	3	2	4
WB-00086	【城市生活成本上升】又上热搜了，看评论区真的什么声音都有。	1	1	12	2	2	3
WB-00087	这两天刷到不少关于【明星塌房后的舆论反转】的讨论，说实话还挺唏嘘的。	1	1	13	2	3	1
WB-00088	这两天刷到不少关于【明星塌房后的舆论反转】的讨论，说实话还挺唏嘘的。	1	3	31	2	3	1
WB-00089	关于【年轻人就业与内卷】这件事，大家关注点好像越来越偏了。	1	1	11	3	1	2
WB-00090	这两天刷到不少关于【国产剧质量讨论】的讨论，说实话还挺唏嘘的。	1	3	31	2	3	4
WB-00091	这两天刷到不少关于【平台算法推荐问题】的讨论，说实话还挺唏嘘的。	1	1	14	1	1	4
WB-00092	【网红带货翻车事件】又上热搜了，看评论区真的什么声音都有。	1	3	32	2	1	4
WB-00093	【年度爆款综艺】又上热搜了，看评论区真的什么声音都有。	1	3	31	1	2	2
WB-00094	这两天刷到不少关于【年度爆款综艺】的讨论，说实话还挺唏嘘的。	1	3	31	4	3	4
WB-00095	【年轻人就业与内卷】又上热搜了，看评论区真的什么声音都有。	1	1	11	4	1	3
WB-00096	关于【明星塌房后的舆论反转】这件事，大家关注点好像越来越偏了。	1	3	33	3	1	2
WB-00097	这两天刷到不少关于【短视频平台的流量机制】的讨论，说实话还挺唏嘘的。	1	1	11	4	2	1
WB-00098	关于【年度爆款综艺】这件事，大家关注点好像越来越偏了。	1	2	24	3	2	4
WB-00099	不得不说，【AI写作与创作者焦虑】最近的讨论热度确实有点夸张。	1	2	22	2	3	3
WB-00100	关于【网红带货翻车事件】这件事，大家关注点好像越来越偏了。	1	1	14	4	3	1
WB-00101	【读书博主推荐争议】又上热搜了，看评论区真的什么声音都有。	1	2	22	2	2	4
WB-00102	【年度爆款综艺】又上热搜了，看评论区真的什么声音都有。	1	1	13	3	1	1
WB-00103	关于【公共事件中的信息透明度】这件事，大家关注点好像越来越偏了。	1	2	23	4	2	4
WB-00104	【明星塌房后的舆论反转】又上热搜了，看评论区真的什么声音都有。	1	2	23	1	2	3
WB-00105	不得不说，【国产剧质量讨论】最近的讨论热度确实有点夸张。	1	1	11	2	3	1
WB-00106	关于【网络暴力与理性讨论】这件事，大家关注点好像越来越偏了。	1	2	22	3	2	2
WB-00107	不得不说，【女性议题与舆论分化】最近的讨论热度确实有点夸张。	1	1	12	3	3	3
WB-00108	不得不说，【读书博主推荐争议】最近的讨论热度确实有点夸张。	1	2	21	3	3	1
WB-00109	这两天刷到不少关于【年度爆款综艺】的讨论，说实话还挺唏嘘的。	1	1	13	4	1	3
WB-00110	这两天刷到不少关于【读书博主推荐争议】的讨论，说实话还挺唏嘘的。	1	3	32	3	1	4
WB-00111	不得不说，【明星塌房后的舆论反转】最近的讨论热度确实有点夸张。	1	3	31	1	1	4
WB-00112	不得不说，【国产剧质量讨论】最近的讨论热度确实有点夸张。	1	2	24	4	3	1
WB-00113	不得不说，【城市生活成本上升】最近的讨论热度确实有点夸张。	1	1	12	1	3	4
WB-00114	【国产剧质量讨论】又上热搜了，看评论区真的什么声音都有。	1	1	13	3	1	1
WB-00115	关于【女性议题与舆论分化】这件事，大家关注点好像越来越偏了。	1	3	33	2	2	1
WB-00116	不得不说，【年度爆款综艺】最近的讨论热度确实有点夸张。	1	1	13	3	2	1
WB-00117	【年轻人就业与内卷】又上热搜了，看评论区真的什么声音都有。	1	2	21	3	3	1
WB-00118	关于【平台算法推荐问题】这件事，大家关注点好像越来越偏了。	1	2	23	1	1	2
WB-00119	这两天刷到不少关于【知识付费是否值得】的讨论，说实话还挺唏嘘的。	1	1	13	1	2	2
WB-00120	【影视改编争议】又上热搜了，看评论区真的什么声音都有。	1	3	32	3	3	1
WB-00121	不得不说，【女性议题与舆论分化】最近的讨论热度确实有点夸张。	1	3	31	2	2	4
WB-00122	【城市生活成本上升】又上热搜了，看评论区真的什么声音都有。	1	1	12	2	2	1
WB-00123	这两天刷到不少关于【平台算法推荐问题】的讨论，说实话还挺唏嘘的。	1	2	22	3	2	3
WB-00124	这两天刷到不少关于【公共事件中的信息透明度】的讨论，说实话还挺唏嘘的。	1	2	21	2	1	3
WB-00125	这两天刷到不少关于【知识付费是否值得】的讨论，说实话还挺唏嘘的。	1	2	22	1	1	3
WB-00126	关于【明星塌房后的舆论反转】这件事，大家关注点好像越来越偏了。	1	3	33	2	2	4
WB-00127	【平台算法推荐问题】又上热搜了，看评论区真的什么声音都有。	1	2	24	3	2	2
WB-00128	不得不说，【女性议题与舆论分化】最近的讨论热度确实有点夸张。	1	2	21	1	2	1
WB-00129	【短视频平台的流量机制】又上热搜了，看评论区真的什么声音都有。	1	3	33	4	3	4
WB-00130	不得不说，【AI写作与创作者焦虑】最近的讨论热度确实有点夸张。	1	2	24	4	3	4
WB-00131	不得不说，【网络暴力与理性讨论】最近的讨论热度确实有点夸张。	1	2	21	4	1	2
WB-00132	不得不说，【年轻人就业与内卷】最近的讨论热度确实有点夸张。	1	1	14	4	1	2
WB-00133	【短视频平台的流量机制】又上热搜了，看评论区真的什么声音都有。	1	1	12	1	1	4
WB-00134	关于【年度爆款综艺】这件事，大家关注点好像越来越偏了。	1	2	22	1	3	1
WB-00135	这两天刷到不少关于【影视改编争议】的讨论，说实话还挺唏嘘的。	1	1	12	1	2	2
WB-00136	【平台算法推荐问题】又上热搜了，看评论区真的什么声音都有。	1	3	31	4	3	4
WB-00137	关于【读书博主推荐争议】这件事，大家关注点好像越来越偏了。	1	3	33	3	1	4
WB-00138	【年轻人就业与内卷】又上热搜了，看评论区真的什么声音都有。	1	2	22	1	1	1
WB-00139	【短视频平台的流量机制】又上热搜了，看评论区真的什么声音都有。	1	2	23	1	1	4
WB-00140	【女性议题与舆论分化】又上热搜了，看评论区真的什么声音都有。	1	1	12	1	2	2
WB-00141	这两天刷到不少关于【年轻人就业与内卷】的讨论，说实话还挺唏嘘的。	1	2	22	3	1	1
WB-00142	不得不说，【读书博主推荐争议】最近的讨论热度确实有点夸张。	1	2	22	4	3	4
WB-00143	不得不说，【城市生活成本上升】最近的讨论热度确实有点夸张。	1	2	24	1	2	4
WB-00144	【读书博主推荐争议】又上热搜了，看评论区真的什么声音都有。	1	1	13	2	3	2
WB-00145	【公共事件中的信息透明度】又上热搜了，看评论区真的什么声音都有。	1	1	13	4	1	1
WB-00146	不得不说，【网络暴力与理性讨论】最近的讨论热度确实有点夸张。	1	2	22	2	3	4
WB-00147	不得不说，【国产剧质量讨论】最近的讨论热度确实有点夸张。	1	3	31	4	3	1
WB-00148	【读书博主推荐争议】又上热搜了，看评论区真的什么声音都有。	1	3	31	4	3	1
WB-00149	这两天刷到不少关于【年轻人就业与内卷】的讨论，说实话还挺唏嘘的。	1	3	32	3	2	1
WB-00150	不得不说，【知识付费是否值得】最近的讨论热度确实有点夸张。	1	1	12	1	3	2
WB-00151	关于【国产剧质量讨论】这件事，大家关注点好像越来越偏了。	1	1	14	1	3	1
WB-00152	这两天刷到不少关于【读书博主推荐争议】的讨论，说实话还挺唏嘘的。	1	1	13	3	3	3
WB-00153	【年度爆款综艺】又上热搜了，看评论区真的什么声音都有。	1	1	14	2	3	1
WB-00154	不得不说，【国产剧质量讨论】最近的讨论热度确实有点夸张。	1	2	24	4	1	2
WB-00155	【短视频平台的流量机制】又上热搜了，看评论区真的什么声音都有。	1	2	23	3	2	4
WB-00156	不得不说，【短视频平台的流量机制】最近的讨论热度确实有点夸张。	1	1	13	1	3	4
WB-00157	不得不说，【AI写作与创作者焦虑】最近的讨论热度确实有点夸张。	1	2	22	1	1	4
WB-00158	这两天刷到不少关于【网红带货翻车事件】的讨论，说实话还挺唏嘘的。	1	3	32	3	2	1
WB-00159	关于【明星塌房后的舆论反转】这件事，大家关注点好像越来越偏了。	1	3	31	4	1	4
WB-00160	这两天刷到不少关于【公共事件中的信息透明度】的讨论，说实话还挺唏嘘的。	1	2	22	4	1	2
WB-00161	关于【城市生活成本上升】这件事，大家关注点好像越来越偏了。	1	2	23	2	2	2
WB-00162	这两天刷到不少关于【影视改编争议】的讨论，说实话还挺唏嘘的。	1	3	33	4	2	3
WB-00163	关于【网络暴力与理性讨论】这件事，大家关注点好像越来越偏了。	1	2	23	1	2	4
WB-00164	【读书博主推荐争议】又上热搜了，看评论区真的什么声音都有。	1	2	23	4	3	1
WB-00165	不得不说，【国产剧质量讨论】最近的讨论热度确实有点夸张。	1	2	22	3	2	4
WB-00166	这两天刷到不少关于【年度爆款综艺】的讨论，说实话还挺唏嘘的。	1	1	14	1	1	3
WB-00167	不得不说，【公共事件中的信息透明度】最近的讨论热度确实有点夸张。	1	1	11	3	3	2
WB-00168	【短视频平台的流量机制】又上热搜了，看评论区真的什么声音都有。	1	3	31	1	2	1
WB-00169	不得不说，【网红带货翻车事件】最近的讨论热度确实有点夸张。	1	1	12	1	2	3
WB-00170	【影视改编争议】又上热搜了，看评论区真的什么声音都有。	1	1	11	2	1	2
WB-00171	这两天刷到不少关于【年轻人就业与内卷】的讨论，说实话还挺唏嘘的。	1	1	11	4	2	3
WB-00172	【年轻人就业与内卷】又上热搜了，看评论区真的什么声音都有。	1	1	12	4	3	2
WB-00173	【短视频平台的流量机制】又上热搜了，看评论区真的什么声音都有。	1	2	24	1	3	4
WB-00174	不得不说，【影视改编争议】最近的讨论热度确实有点夸张。	1	3	31	4	1	1
WB-00175	这两天刷到不少关于【短视频平台的流量机制】的讨论，说实话还挺唏嘘的。	1	3	33	1	3	1
WB-00176	这两天刷到不少关于【读书博主推荐争议】的讨论，说实话还挺唏嘘的。	1	2	22	2	1	4
WB-00177	这两天刷到不少关于【网红带货翻车事件】的讨论，说实话还挺唏嘘的。	1	3	32	3	1	4
WB-00178	这两天刷到不少关于【明星塌房后的舆论反转】的讨论，说实话还挺唏嘘的。	1	3	32	4	2	4
WB-00179	这两天刷到不少关于【城市生活成本上升】的讨论，说实话还挺唏嘘的。	1	2	23	3	1	4
WB-00180	【城市生活成本上升】又上热搜了，看评论区真的什么声音都有。	1	2	24	4	2	3
WB-00181	关于【读书博主推荐争议】这件事，大家关注点好像越来越偏了。	1	2	21	2	3	1
WB-00182	这两天刷到不少关于【年度爆款综艺】的讨论，说实话还挺唏嘘的。	1	2	24	3	2	1
WB-00183	关于【短视频平台的流量机制】这件事，大家关注点好像越来越偏了。	1	1	13	1	1	4
WB-00184	关于【国产剧质量讨论】这件事，大家关注点好像越来越偏了。	1	2	23	3	3	4
WB-00185	不得不说，【城市生活成本上升】最近的讨论热度确实有点夸张。	1	1	12	4	1	1
WB-00186	【年度爆款综艺】又上热搜了，看评论区真的什么声音都有。	1	2	24	1	1	4
WB-00187	不得不说，【读书博主推荐争议】最近的讨论热度确实有点夸张。	1	3	31	3	3	4
WB-00188	关于【年度爆款综艺】这件事，大家关注点好像越来越偏了。	1	1	12	4	1	2
WB-00189	【读书博主推荐争议】又上热搜了，看评论区真的什么声音都有。	1	1	11	2	3	4
WB-00190	关于【女性议题与舆论分化】这件事，大家关注点好像越来越偏了。	1	1	13	3	3	1
WB-00191	关于【情绪价值消费】这件事，大家关注点好像越来越偏了。	1	2	24	2	2	4
WB-00192	【明星塌房后的舆论反转】又上热搜了，看评论区真的什么声音都有。	1	3	33	4	3	2
WB-00193	关于【城市生活成本上升】这件事，大家关注点好像越来越偏了。	1	1	11	2	1	1
WB-00194	这两天刷到不少关于【国产剧质量讨论】的讨论，说实话还挺唏嘘的。	1	2	24	2	2	4
WB-00195	【知识付费是否值得】又上热搜了，看评论区真的什么声音都有。	1	1	13	2	3	4
WB-00196	关于【影视改编争议】这件事，大家关注点好像越来越偏了。	1	1	11	3	2	1
WB-00197	不得不说，【明星塌房后的舆论反转】最近的讨论热度确实有点夸张。	1	1	14	1	3	2
WB-00198	【女性议题与舆论分化】又上热搜了，看评论区真的什么声音都有。	1	1	13	1	2	1
WB-00199	关于【知识付费是否值得】这件事，大家关注点好像越来越偏了。	1	2	21	3	2	4
WB-00200	这两天刷到不少关于【网红带货翻车事件】的讨论，说实话还挺唏嘘的。	1	1	12	2	3	4
WB-00201	关于【影视改编争议】这件事，大家关注点好像越来越偏了。	1	2	22	3	3	1
WB-00202	不得不说，【女性议题与舆论分化】最近的讨论热度确实有点夸张。	1	1	11	2	2	1
WB-00203	不得不说，【网络暴力与理性讨论】最近的讨论热度确实有点夸张。	1	1	11	1	3	3
WB-00204	不得不说，【明星塌房后的舆论反转】最近的讨论热度确实有点夸张。	1	1	11	4	3	4
WB-00205	关于【女性议题与舆论分化】这件事，大家关注点好像越来越偏了。	1	1	13	3	1	3
WB-00206	【网络暴力与理性讨论】又上热搜了，看评论区真的什么声音都有。	1	1	12	2	3	3
WB-00207	这两天刷到不少关于【情绪价值消费】的讨论，说实话还挺唏嘘的。	1	2	24	4	3	2
WB-00208	这两天刷到不少关于【网络暴力与理性讨论】的讨论，说实话还挺唏嘘的。	1	3	31	4	3	4
WB-00209	【年度爆款综艺】又上热搜了，看评论区真的什么声音都有。	1	1	13	4	3	2
WB-00210	【城市生活成本上升】又上热搜了，看评论区真的什么声音都有。	1	3	33	4	2	2
WB-00211	不得不说，【公共事件中的信息透明度】最近的讨论热度确实有点夸张。	1	1	12	3	2	3
WB-00212	这两天刷到不少关于【AI写作与创作者焦虑】的讨论，说实话还挺唏嘘的。	1	2	24	4	1	2
WB-00213	【知识付费是否值得】又上热搜了，看评论区真的什么声音都有。	1	1	12	2	2	3
WB-00214	关于【读书博主推荐争议】这件事，大家关注点好像越来越偏了。	1	1	13	3	3	1
WB-00215	【短视频平台的流量机制】又上热搜了，看评论区真的什么声音都有。	1	1	11	3	3	1
WB-00216	这两天刷到不少关于【读书博主推荐争议】的讨论，说实话还挺唏嘘的。	1	1	14	2	3	3
WB-00217	这两天刷到不少关于【明星塌房后的舆论反转】的讨论，说实话还挺唏嘘的。	1	3	32	3	1	2
WB-00218	不得不说，【影视改编争议】最近的讨论热度确实有点夸张。	1	2	22	3	2	3
WB-00219	【情绪价值消费】又上热搜了，看评论区真的什么声音都有。	1	2	21	3	1	3
WB-00220	不得不说，【明星塌房后的舆论反转】最近的讨论热度确实有点夸张。	1	3	31	4	1	3
WB-00221	不得不说，【公共事件中的信息透明度】最近的讨论热度确实有点夸张。	1	2	22	3	1	4
WB-00222	不得不说，【女性议题与舆论分化】最近的讨论热度确实有点夸张。	1	3	31	3	3	4
WB-00223	这两天刷到不少关于【网络暴力与理性讨论】的讨论，说实话还挺唏嘘的。	1	2	22	1	1	2
WB-00224	关于【公共事件中的信息透明度】这件事，大家关注点好像越来越偏了。	1	3	31	1	2	3
WB-00225	【影视改编争议】又上热搜了，看评论区真的什么声音都有。	1	3	33	4	2	1
WB-00226	关于【网络暴力与理性讨论】这件事，大家关注点好像越来越偏了。	1	3	31	1	1	1
WB-00227	关于【AI写作与创作者焦虑】这件事，大家关注点好像越来越偏了。	1	1	12	3	3	3
WB-00228	【女性议题与舆论分化】又上热搜了，看评论区真的什么声音都有。	1	2	21	2	1	1
WB-00229	【公共事件中的信息透明度】又上热搜了，看评论区真的什么声音都有。	1	1	13	4	1	1
WB-00230	【影视改编争议】又上热搜了，看评论区真的什么声音都有。	1	2	23	4	2	4
WB-00231	不得不说，【明星塌房后的舆论反转】最近的讨论热度确实有点夸张。	1	2	23	4	3	1
WB-00232	关于【读书博主推荐争议】这件事，大家关注点好像越来越偏了。	1	3	32	4	2	1
WB-00233	这两天刷到不少关于【AI写作与创作者焦虑】的讨论，说实话还挺唏嘘的。	1	2	24	2	3	4
WB-00234	这两天刷到不少关于【城市生活成本上升】的讨论，说实话还挺唏嘘的。	1	2	21	1	1	4
WB-00235	【年轻人就业与内卷】又上热搜了，看评论区真的什么声音都有。	1	2	22	4	3	2
WB-00236	这两天刷到不少关于【年轻人就业与内卷】的讨论，说实话还挺唏嘘的。	1	2	24	3	3	3
WB-00237	这两天刷到不少关于【知识付费是否值得】的讨论，说实话还挺唏嘘的。	1	1	13	1	3	4
WB-00238	这两天刷到不少关于【年度爆款综艺】的讨论，说实话还挺唏嘘的。	1	3	32	4	3	4
WB-00239	这两天刷到不少关于【女性议题与舆论分化】的讨论，说实话还挺唏嘘的。	1	2	24	4	2	4
WB-00240	【女性议题与舆论分化】又上热搜了，看评论区真的什么声音都有。	1	3	33	2	2	1
WB-00241	这两天刷到不少关于【AI写作与创作者焦虑】的讨论，说实话还挺唏嘘的。	1	3	33	4	3	1
WB-00242	【短视频平台的流量机制】又上热搜了，看评论区真的什么声音都有。	1	2	22	2	2	3
WB-00243	关于【网红带货翻车事件】这件事，大家关注点好像越来越偏了。	1	3	33	4	2	1
WB-00244	这两天刷到不少关于【网红带货翻车事件】的讨论，说实话还挺唏嘘的。	1	2	24	4	2	2
WB-00245	【公共事件中的信息透明度】又上热搜了，看评论区真的什么声音都有。	1	1	14	1	2	4
WB-00246	这两天刷到不少关于【知识付费是否值得】的讨论，说实话还挺唏嘘的。	1	2	22	3	1	2
WB-00247	关于【网红带货翻车事件】这件事，大家关注点好像越来越偏了。	1	3	32	4	2	1
WB-00248	这两天刷到不少关于【读书博主推荐争议】的讨论，说实话还挺唏嘘的。	1	3	31	1	3	2
WB-00249	关于【国产剧质量讨论】这件事，大家关注点好像越来越偏了。	1	2	22	3	1	4
WB-00250	【年度爆款综艺】又上热搜了，看评论区真的什么声音都有。	1	2	21	3	2	1
WB-00251	【影视改编争议】又上热搜了，看评论区真的什么声音都有。	1	2	23	3	3	3
WB-00252	关于【城市生活成本上升】这件事，大家关注点好像越来越偏了。	1	2	24	1	3	4
WB-00253	关于【AI写作与创作者焦虑】这件事，大家关注点好像越来越偏了。	1	1	12	1	2	4
WB-00254	【明星塌房后的舆论反转】又上热搜了，看评论区真的什么声音都有。	1	3	33	1	3	4
WB-00255	这两天刷到不少关于【AI写作与创作者焦虑】的讨论，说实话还挺唏嘘的。	1	2	21	2	3	4
WB-00256	这两天刷到不少关于【网红带货翻车事件】的讨论，说实话还挺唏嘘的。	1	3	32	4	3	1
WB-00257	【平台算法推荐问题】又上热搜了，看评论区真的什么声音都有。	1	1	14	2	3	3
WB-00258	关于【女性议题与舆论分化】这件事，大家关注点好像越来越偏了。	1	2	21	3	3	3
WB-00259	不得不说，【情绪价值消费】最近的讨论热度确实有点夸张。	1	3	32	1	1	4
WB-00260	【AI写作与创作者焦虑】又上热搜了，看评论区真的什么声音都有。	1	1	11	1	2	3
WB-00261	不得不说，【影视改编争议】最近的讨论热度确实有点夸张。	1	3	32	2	3	3
WB-00262	不得不说，【平台算法推荐问题】最近的讨论热度确实有点夸张。	1	3	32	1	3	4
WB-00263	关于【女性议题与舆论分化】这件事，大家关注点好像越来越偏了。	1	3	33	1	1	3
WB-00264	关于【国产剧质量讨论】这件事，大家关注点好像越来越偏了。	1	3	32	2	1	3
WB-00265	【明星塌房后的舆论反转】又上热搜了，看评论区真的什么声音都有。	1	1	11	3	2	1
WB-00266	关于【平台算法推荐问题】这件事，大家关注点好像越来越偏了。	1	3	31	4	3	2
WB-00267	这两天刷到不少关于【读书博主推荐争议】的讨论，说实话还挺唏嘘的。	1	3	32	1	2	4
WB-00268	这两天刷到不少关于【网红带货翻车事件】的讨论，说实话还挺唏嘘的。	1	2	24	3	2	1
WB-00269	这两天刷到不少关于【年轻人就业与内卷】的讨论，说实话还挺唏嘘的。	1	2	23	2	2	2
WB-00270	这两天刷到不少关于【公共事件中的信息透明度】的讨论，说实话还挺唏嘘的。	1	1	12	1	2	2
WB-00271	关于【读书博主推荐争议】这件事，大家关注点好像越来越偏了。	1	2	24	4	3	2
WB-00272	【网红带货翻车事件】又上热搜了，看评论区真的什么声音都有。	1	2	21	2	2	3
WB-00273	不得不说，【短视频平台的流量机制】最近的讨论热度确实有点夸张。	1	1	12	3	2	4
WB-00274	这两天刷到不少关于【短视频平台的流量机制】的讨论，说实话还挺唏嘘的。	1	2	24	2	1	2
WB-00275	【明星塌房后的舆论反转】又上热搜了，看评论区真的什么声音都有。	1	3	31	3	1	3
WB-00276	这两天刷到不少关于【女性议题与舆论分化】的讨论，说实话还挺唏嘘的。	1	3	33	3	2	4
WB-00277	不得不说，【年轻人就业与内卷】最近的讨论热度确实有点夸张。	1	3	31	2	2	1
WB-00278	不得不说，【明星塌房后的舆论反转】最近的讨论热度确实有点夸张。	1	3	33	3	2	4
WB-00279	【年度爆款综艺】又上热搜了，看评论区真的什么声音都有。	1	1	14	4	3	4
WB-00280	不得不说，【女性议题与舆论分化】最近的讨论热度确实有点夸张。	1	1	13	4	1	2
WB-00281	关于【平台算法推荐问题】这件事，大家关注点好像越来越偏了。	1	1	12	4	2	3
WB-00282	不得不说，【短视频平台的流量机制】最近的讨论热度确实有点夸张。	1	2	23	1	2	1
WB-00283	关于【平台算法推荐问题】这件事，大家关注点好像越来越偏了。	1	3	32	2	1	4
WB-00284	不得不说，【影视改编争议】最近的讨论热度确实有点夸张。	1	2	21	2	3	4
WB-00285	不得不说，【年度爆款综艺】最近的讨论热度确实有点夸张。	1	3	31	4	3	1
WB-00286	这两天刷到不少关于【AI写作与创作者焦虑】的讨论，说实话还挺唏嘘的。	1	1	11	4	1	1
WB-00287	【网红带货翻车事件】又上热搜了，看评论区真的什么声音都有。	1	2	21	3	3	2
WB-00288	关于【短视频平台的流量机制】这件事，大家关注点好像越来越偏了。	1	2	24	1	1	4
WB-00289	【知识付费是否值得】又上热搜了，看评论区真的什么声音都有。	1	1	12	3	3	1
WB-00290	不得不说，【影视改编争议】最近的讨论热度确实有点夸张。	1	1	11	2	1	2
WB-00291	【知识付费是否值得】又上热搜了，看评论区真的什么声音都有。	1	2	22	2	1	2
WB-00292	【城市生活成本上升】又上热搜了，看评论区真的什么声音都有。	1	2	22	4	1	4
WB-00293	不得不说，【网络暴力与理性讨论】最近的讨论热度确实有点夸张。	1	2	23	3	3	2
WB-00294	关于【读书博主推荐争议】这件事，大家关注点好像越来越偏了。	1	3	32	1	1	1
WB-00295	【影视改编争议】又上热搜了，看评论区真的什么声音都有。	1	1	12	1	2	2
WB-00296	关于【女性议题与舆论分化】这件事，大家关注点好像越来越偏了。	1	3	32	1	3	4
WB-00297	关于【影视改编争议】这件事，大家关注点好像越来越偏了。	1	3	33	3	1	1
WB-00298	不得不说，【影视改编争议】最近的讨论热度确实有点夸张。	1	1	14	2	2	3
WB-00299	关于【年度爆款综艺】这件事，大家关注点好像越来越偏了。	1	3	32	4	3	2
WB-00300	关于【平台算法推荐问题】这件事，大家关注点好像越来越偏了。	1	2	24	2	1	4
WB-00301	关于【情绪价值消费】这件事，大家关注点好像越来越偏了。	1	2	23	2	3	1
WB-00302	关于【读书博主推荐争议】这件事，大家关注点好像越来越偏了。	1	1	13	3	2	2
WB-00303	这两天刷到不少关于【短视频平台的流量机制】的讨论，说实话还挺唏嘘的。	1	2	22	2	2	2
WB-00304	这两天刷到不少关于【网红带货翻车事件】的讨论，说实话还挺唏嘘的。	1	1	14	4	3	4
WB-00305	不得不说，【网络暴力与理性讨论】最近的讨论热度确实有点夸张。	1	1	14	4	3	3
WB-00306	这两天刷到不少关于【知识付费是否值得】的讨论，说实话还挺唏嘘的。	1	3	31	3	1	1
WB-00307	这两天刷到不少关于【女性议题与舆论分化】的讨论，说实话还挺唏嘘的。	1	2	21	3	2	4
WB-00308	不得不说，【读书博主推荐争议】最近的讨论热度确实有点夸张。	1	3	33	1	1	1
WB-00309	【年轻人就业与内卷】又上热搜了，看评论区真的什么声音都有。	1	2	22	2	2	3
WB-00310	不得不说，【年度爆款综艺】最近的讨论热度确实有点夸张。	1	2	22	1	1	1
WB-00311	不得不说，【女性议题与舆论分化】最近的讨论热度确实有点夸张。	1	2	21	3	3	4
WB-00312	不得不说，【网红带货翻车事件】最近的讨论热度确实有点夸张。	1	2	21	3	2	4
WB-00313	这两天刷到不少关于【读书博主推荐争议】的讨论，说实话还挺唏嘘的。	1	1	14	3	2	4
WB-00314	【女性议题与舆论分化】又上热搜了，看评论区真的什么声音都有。	1	2	21	4	2	3
WB-00315	不得不说，【知识付费是否值得】最近的讨论热度确实有点夸张。	1	3	33	4	1	1
WB-00316	不得不说，【短视频平台的流量机制】最近的讨论热度确实有点夸张。	1	3	31	2	3	3
WB-00317	不得不说，【年度爆款综艺】最近的讨论热度确实有点夸张。	1	2	22	2	2	1
WB-00318	【年轻人就业与内卷】又上热搜了，看评论区真的什么声音都有。	1	2	22	4	3	2
WB-00319	关于【公共事件中的信息透明度】这件事，大家关注点好像越来越偏了。	1	2	24	4	3	3
WB-00320	【读书博主推荐争议】又上热搜了，看评论区真的什么声音都有。	1	1	12	3	1	4
WB-00321	这两天刷到不少关于【城市生活成本上升】的讨论，说实话还挺唏嘘的。	1	3	33	1	1	2
WB-00322	【年度爆款综艺】又上热搜了，看评论区真的什么声音都有。	1	2	22	2	3	1
WB-00323	不得不说，【女性议题与舆论分化】最近的讨论热度确实有点夸张。	1	2	21	4	1	1
WB-00324	关于【女性议题与舆论分化】这件事，大家关注点好像越来越偏了。	1	3	31	3	3	3
WB-00325	关于【国产剧质量讨论】这件事，大家关注点好像越来越偏了。	1	1	13	4	2	3
WB-00326	关于【国产剧质量讨论】这件事，大家关注点好像越来越偏了。	1	1	14	4	1	2
WB-00327	关于【知识付费是否值得】这件事，大家关注点好像越来越偏了。	1	3	33	3	2	3
WB-00328	【城市生活成本上升】又上热搜了，看评论区真的什么声音都有。	1	1	11	1	3	2
WB-00329	【国产剧质量讨论】又上热搜了，看评论区真的什么声音都有。	1	3	31	1	2	3
WB-00330	【女性议题与舆论分化】又上热搜了，看评论区真的什么声音都有。	1	3	33	2	1	3
WB-00331	不得不说，【城市生活成本上升】最近的讨论热度确实有点夸张。	1	1	13	3	1	1
WB-00332	【国产剧质量讨论】又上热搜了，看评论区真的什么声音都有。	1	3	31	1	1	2
WB-00333	不得不说，【明星塌房后的舆论反转】最近的讨论热度确实有点夸张。	1	1	13	2	3	3
WB-00334	【年度爆款综艺】又上热搜了，看评论区真的什么声音都有。	1	2	23	1	1	2
WB-00335	这两天刷到不少关于【短视频平台的流量机制】的讨论，说实话还挺唏嘘的。	1	3	33	4	3	1
WB-00336	关于【平台算法推荐问题】这件事，大家关注点好像越来越偏了。	1	1	11	1	2	4
WB-00337	这两天刷到不少关于【年轻人就业与内卷】的讨论，说实话还挺唏嘘的。	1	2	23	1	3	2
WB-00338	这两天刷到不少关于【影视改编争议】的讨论，说实话还挺唏嘘的。	1	2	24	1	2	4
WB-00339	不得不说，【短视频平台的流量机制】最近的讨论热度确实有点夸张。	1	2	22	1	3	2
WB-00340	这两天刷到不少关于【读书博主推荐争议】的讨论，说实话还挺唏嘘的。	1	1	13	3	1	4
WB-00341	不得不说，【公共事件中的信息透明度】最近的讨论热度确实有点夸张。	1	1	11	3	2	3
WB-00342	【AI写作与创作者焦虑】又上热搜了，看评论区真的什么声音都有。	1	1	12	4	1	3
WB-00343	不得不说，【短视频平台的流量机制】最近的讨论热度确实有点夸张。	1	2	21	3	3	1
WB-00344	这两天刷到不少关于【城市生活成本上升】的讨论，说实话还挺唏嘘的。	1	1	13	4	2	3
WB-00345	关于【国产剧质量讨论】这件事，大家关注点好像越来越偏了。	1	2	21	2	2	1
WB-00346	【情绪价值消费】又上热搜了，看评论区真的什么声音都有。	1	3	32	1	3	3
WB-00347	关于【知识付费是否值得】这件事，大家关注点好像越来越偏了。	1	2	22	2	2	2
WB-00348	【年轻人就业与内卷】又上热搜了，看评论区真的什么声音都有。	1	1	11	2	2	3
WB-00349	关于【知识付费是否值得】这件事，大家关注点好像越来越偏了。	1	2	24	3	1	2
WB-00350	不得不说，【读书博主推荐争议】最近的讨论热度确实有点夸张。	1	2	24	4	3	4
WB-00351	【AI写作与创作者焦虑】又上热搜了，看评论区真的什么声音都有。	1	1	12	2	2	3
WB-00352	【女性议题与舆论分化】又上热搜了，看评论区真的什么声音都有。	1	2	21	3	2	1
WB-00353	这两天刷到不少关于【读书博主推荐争议】的讨论，说实话还挺唏嘘的。	1	3	33	4	1	2
WB-00354	这两天刷到不少关于【短视频平台的流量机制】的讨论，说实话还挺唏嘘的。	1	1	13	1	3	4
WB-00355	【网红带货翻车事件】又上热搜了，看评论区真的什么声音都有。	1	1	11	3	3	1
WB-00356	这两天刷到不少关于【女性议题与舆论分化】的讨论，说实话还挺唏嘘的。	1	1	14	1	1	1
WB-00357	这两天刷到不少关于【网络暴力与理性讨论】的讨论，说实话还挺唏嘘的。	1	1	12	1	2	1
WB-00358	关于【年轻人就业与内卷】这件事，大家关注点好像越来越偏了。	1	3	32	1	1	4
WB-00359	【情绪价值消费】又上热搜了，看评论区真的什么声音都有。	1	3	32	1	2	2
WB-00360	【女性议题与舆论分化】又上热搜了，看评论区真的什么声音都有。	1	1	13	1	1	2
WB-00361	不得不说，【年度爆款综艺】最近的讨论热度确实有点夸张。	1	2	24	1	1	2
WB-00362	这两天刷到不少关于【短视频平台的流量机制】的讨论，说实话还挺唏嘘的。	1	3	31	3	1	3
WB-00363	【明星塌房后的舆论反转】又上热搜了，看评论区真的什么声音都有。	1	1	12	3	3	2
WB-00364	不得不说，【公共事件中的信息透明度】最近的讨论热度确实有点夸张。	1	1	14	2	1	4
WB-00365	不得不说，【城市生活成本上升】最近的讨论热度确实有点夸张。	1	2	24	3	2	1
WB-00366	【AI写作与创作者焦虑】又上热搜了，看评论区真的什么声音都有。	1	1	11	3	3	2
WB-00367	【明星塌房后的舆论反转】又上热搜了，看评论区真的什么声音都有。	1	2	23	3	2	4
WB-00368	【AI写作与创作者焦虑】又上热搜了，看评论区真的什么声音都有。	1	3	31	2	3	2
WB-00369	【影视改编争议】又上热搜了，看评论区真的什么声音都有。	1	3	32	2	1	1
WB-00370	这两天刷到不少关于【女性议题与舆论分化】的讨论，说实话还挺唏嘘的。	1	1	13	2	1	2
WB-00371	这两天刷到不少关于【网红带货翻车事件】的讨论，说实话还挺唏嘘的。	1	3	32	1	2	1
WB-00372	【年轻人就业与内卷】又上热搜了，看评论区真的什么声音都有。	1	1	13	1	2	1
WB-00373	这两天刷到不少关于【明星塌房后的舆论反转】的讨论，说实话还挺唏嘘的。	1	2	22	2	1	1
WB-00374	这两天刷到不少关于【网络暴力与理性讨论】的讨论，说实话还挺唏嘘的。	1	2	23	4	2	1
WB-00375	这两天刷到不少关于【年度爆款综艺】的讨论，说实话还挺唏嘘的。	1	3	33	1	1	1
WB-00376	关于【城市生活成本上升】这件事，大家关注点好像越来越偏了。	1	1	14	1	3	3
WB-00377	【知识付费是否值得】又上热搜了，看评论区真的什么声音都有。	1	3	32	4	1	4
WB-00378	不得不说，【网络暴力与理性讨论】最近的讨论热度确实有点夸张。	1	1	13	3	1	1
WB-00379	不得不说，【明星塌房后的舆论反转】最近的讨论热度确实有点夸张。	1	3	31	1	2	1
WB-00380	这两天刷到不少关于【明星塌房后的舆论反转】的讨论，说实话还挺唏嘘的。	1	1	13	1	3	4
WB-00381	这两天刷到不少关于【读书博主推荐争议】的讨论，说实话还挺唏嘘的。	1	2	23	2	3	3
WB-00382	这两天刷到不少关于【国产剧质量讨论】的讨论，说实话还挺唏嘘的。	1	1	11	1	1	1
WB-00383	不得不说，【影视改编争议】最近的讨论热度确实有点夸张。	1	3	33	2	3	2
WB-00384	【明星塌房后的舆论反转】又上热搜了，看评论区真的什么声音都有。	1	1	11	3	3	3
WB-00385	关于【年度爆款综艺】这件事，大家关注点好像越来越偏了。	1	2	23	2	1	3
WB-00386	这两天刷到不少关于【知识付费是否值得】的讨论，说实话还挺唏嘘的。	1	2	22	4	1	3
WB-00387	这两天刷到不少关于【年轻人就业与内卷】的讨论，说实话还挺唏嘘的。	1	1	12	4	2	2
WB-00388	这两天刷到不少关于【网红带货翻车事件】的讨论，说实话还挺唏嘘的。	1	1	14	2	1	4
WB-00389	这两天刷到不少关于【女性议题与舆论分化】的讨论，说实话还挺唏嘘的。	1	2	22	1	3	3
WB-00390	不得不说，【年轻人就业与内卷】最近的讨论热度确实有点夸张。	1	1	13	4	3	4
WB-00391	这两天刷到不少关于【女性议题与舆论分化】的讨论，说实话还挺唏嘘的。	1	1	13	2	1	4
WB-00392	【影视改编争议】又上热搜了，看评论区真的什么声音都有。	1	2	21	2	3	3
WB-00393	关于【明星塌房后的舆论反转】这件事，大家关注点好像越来越偏了。	1	1	13	2	2	2
WB-00394	关于【知识付费是否值得】这件事，大家关注点好像越来越偏了。	1	2	21	1	1	4
WB-00395	关于【AI写作与创作者焦虑】这件事，大家关注点好像越来越偏了。	1	2	21	4	3	2
WB-00396	不得不说，【年轻人就业与内卷】最近的讨论热度确实有点夸张。	1	3	31	4	1	4
WB-00397	不得不说，【短视频平台的流量机制】最近的讨论热度确实有点夸张。	1	1	12	2	2	3
WB-00398	这两天刷到不少关于【公共事件中的信息透明度】的讨论，说实话还挺唏嘘的。	1	1	12	4	3	4
WB-00399	不得不说，【城市生活成本上升】最近的讨论热度确实有点夸张。	1	2	22	4	2	1
WB-00400	不得不说，【网络暴力与理性讨论】最近的讨论热度确实有点夸张。	1	3	32	4	2	2
WB-00401	关于【知识付费是否值得】这件事，大家关注点好像越来越偏了。	1	3	33	2	3	1
WB-00402	关于【AI写作与创作者焦虑】这件事，大家关注点好像越来越偏了。	1	1	13	4	3	1
WB-00403	【AI写作与创作者焦虑】又上热搜了，看评论区真的什么声音都有。	1	3	31	3	1	4
WB-00404	关于【平台算法推荐问题】这件事，大家关注点好像越来越偏了。	1	3	33	2	1	3
WB-00405	关于【读书博主推荐争议】这件事，大家关注点好像越来越偏了。	1	1	13	2	1	3
WB-00406	这两天刷到不少关于【年度爆款综艺】的讨论，说实话还挺唏嘘的。	1	2	21	1	3	4
WB-00407	【国产剧质量讨论】又上热搜了，看评论区真的什么声音都有。	1	1	11	4	2	2
WB-00408	不得不说，【影视改编争议】最近的讨论热度确实有点夸张。	1	2	22	4	3	2
WB-00409	【知识付费是否值得】又上热搜了，看评论区真的什么声音都有。	1	3	33	2	3	3
WB-00410	不得不说，【年轻人就业与内卷】最近的讨论热度确实有点夸张。	1	2	22	3	3	3
WB-00411	这两天刷到不少关于【年轻人就业与内卷】的讨论，说实话还挺唏嘘的。	1	2	23	2	3	2
WB-00412	不得不说，【读书博主推荐争议】最近的讨论热度确实有点夸张。	1	2	23	1	3	2
WB-00413	这两天刷到不少关于【明星塌房后的舆论反转】的讨论，说实话还挺唏嘘的。	1	3	33	1	3	3
WB-00414	这两天刷到不少关于【网络暴力与理性讨论】的讨论，说实话还挺唏嘘的。	1	1	11	1	2	2
WB-00415	【知识付费是否值得】又上热搜了，看评论区真的什么声音都有。	1	1	14	2	1	4
WB-00416	这两天刷到不少关于【情绪价值消费】的讨论，说实话还挺唏嘘的。	1	1	13	3	3	3
WB-00417	不得不说，【读书博主推荐争议】最近的讨论热度确实有点夸张。	1	1	12	3	2	3
WB-00418	不得不说，【公共事件中的信息透明度】最近的讨论热度确实有点夸张。	1	2	22	4	3	1
WB-00419	这两天刷到不少关于【年度爆款综艺】的讨论，说实话还挺唏嘘的。	1	2	21	3	1	2
WB-00420	【读书博主推荐争议】又上热搜了，看评论区真的什么声音都有。	1	2	23	2	3	1
WB-00421	这两天刷到不少关于【网络暴力与理性讨论】的讨论，说实话还挺唏嘘的。	1	2	23	3	1	1
WB-00422	这两天刷到不少关于【读书博主推荐争议】的讨论，说实话还挺唏嘘的。	1	1	14	3	1	1
WB-00423	【短视频平台的流量机制】又上热搜了，看评论区真的什么声音都有。	1	1	11	4	3	4
WB-00424	不得不说，【网红带货翻车事件】最近的讨论热度确实有点夸张。	1	3	33	1	1	2
WB-00425	这两天刷到不少关于【年度爆款综艺】的讨论，说实话还挺唏嘘的。	1	2	22	3	1	2
WB-00426	【年轻人就业与内卷】又上热搜了，看评论区真的什么声音都有。	1	1	12	1	1	2
WB-00427	关于【知识付费是否值得】这件事，大家关注点好像越来越偏了。	1	3	33	3	3	4
WB-00428	不得不说，【影视改编争议】最近的讨论热度确实有点夸张。	1	2	21	1	2	1
WB-00429	这两天刷到不少关于【公共事件中的信息透明度】的讨论，说实话还挺唏嘘的。	1	3	31	4	1	4
WB-00430	这两天刷到不少关于【国产剧质量讨论】的讨论，说实话还挺唏嘘的。	1	2	23	1	2	1
WB-00431	【公共事件中的信息透明度】又上热搜了，看评论区真的什么声音都有。	1	2	23	3	2	1
WB-00432	关于【网络暴力与理性讨论】这件事，大家关注点好像越来越偏了。	1	1	12	4	1	4
WB-00433	不得不说，【平台算法推荐问题】最近的讨论热度确实有点夸张。	1	3	33	2	2	4
WB-00434	这两天刷到不少关于【网络暴力与理性讨论】的讨论，说实话还挺唏嘘的。	1	1	13	2	3	2
WB-00435	这两天刷到不少关于【明星塌房后的舆论反转】的讨论，说实话还挺唏嘘的。	1	3	32	2	3	3
WB-00436	关于【年度爆款综艺】这件事，大家关注点好像越来越偏了。	1	3	32	3	1	4
WB-00437	不得不说，【影视改编争议】最近的讨论热度确实有点夸张。	1	2	23	1	3	1
WB-00438	这两天刷到不少关于【知识付费是否值得】的讨论，说实话还挺唏嘘的。	1	2	24	4	3	1
WB-00439	关于【网红带货翻车事件】这件事，大家关注点好像越来越偏了。	1	2	23	1	3	2
WB-00440	不得不说，【情绪价值消费】最近的讨论热度确实有点夸张。	1	2	21	4	1	1
WB-00441	关于【平台算法推荐问题】这件事，大家关注点好像越来越偏了。	1	3	33	4	2	4
WB-00442	关于【女性议题与舆论分化】这件事，大家关注点好像越来越偏了。	1	2	21	3	1	1
WB-00443	【影视改编争议】又上热搜了，看评论区真的什么声音都有。	1	2	23	4	2	1
WB-00444	这两天刷到不少关于【网络暴力与理性讨论】的讨论，说实话还挺唏嘘的。	1	1	14	4	3	1
WB-00445	不得不说，【知识付费是否值得】最近的讨论热度确实有点夸张。	1	1	13	3	3	3
WB-00446	这两天刷到不少关于【网络暴力与理性讨论】的讨论，说实话还挺唏嘘的。	1	2	22	4	3	1
WB-00447	【明星塌房后的舆论反转】又上热搜了，看评论区真的什么声音都有。	1	1	13	4	3	4
WB-00448	关于【年轻人就业与内卷】这件事，大家关注点好像越来越偏了。	1	1	11	3	3	1
WB-00449	不得不说，【平台算法推荐问题】最近的讨论热度确实有点夸张。	1	1	13	4	3	1
WB-00450	【城市生活成本上升】又上热搜了，看评论区真的什么声音都有。	1	2	21	4	1	3
WB-00451	不得不说，【明星塌房后的舆论反转】最近的讨论热度确实有点夸张。	1	2	23	3	3	4
WB-00452	关于【城市生活成本上升】这件事，大家关注点好像越来越偏了。	1	3	32	1	3	3
WB-00453	这两天刷到不少关于【年轻人就业与内卷】的讨论，说实话还挺唏嘘的。	1	1	14	4	1	4
WB-00454	【短视频平台的流量机制】又上热搜了，看评论区真的什么声音都有。	1	1	11	1	2	1
WB-00455	关于【网红带货翻车事件】这件事，大家关注点好像越来越偏了。	1	2	21	3	1	3
WB-00456	不得不说，【读书博主推荐争议】最近的讨论热度确实有点夸张。	1	1	12	4	1	1
WB-00457	关于【年度爆款综艺】这件事，大家关注点好像越来越偏了。	1	2	24	2	2	1
WB-00458	【影视改编争议】又上热搜了，看评论区真的什么声音都有。	1	1	14	3	1	3
WB-00459	这两天刷到不少关于【公共事件中的信息透明度】的讨论，说实话还挺唏嘘的。	1	3	32	1	3	1
WB-00460	不得不说，【年度爆款综艺】最近的讨论热度确实有点夸张。	1	3	33	4	1	4
WB-00461	不得不说，【网红带货翻车事件】最近的讨论热度确实有点夸张。	1	2	21	1	1	4
WB-00462	这两天刷到不少关于【国产剧质量讨论】的讨论，说实话还挺唏嘘的。	1	1	11	1	1	1
WB-00463	【年度爆款综艺】又上热搜了，看评论区真的什么声音都有。	1	1	13	4	3	3
WB-00464	关于【城市生活成本上升】这件事，大家关注点好像越来越偏了。	1	1	11	2	2	1
WB-00465	【公共事件中的信息透明度】又上热搜了，看评论区真的什么声音都有。	1	1	14	1	3	1
WB-00466	不得不说，【公共事件中的信息透明度】最近的讨论热度确实有点夸张。	1	3	31	4	3	4
WB-00467	关于【网红带货翻车事件】这件事，大家关注点好像越来越偏了。	1	1	14	1	1	3
WB-00468	这两天刷到不少关于【影视改编争议】的讨论，说实话还挺唏嘘的。	1	3	32	1	1	1
WB-00469	这两天刷到不少关于【网络暴力与理性讨论】的讨论，说实话还挺唏嘘的。	1	1	14	1	3	4
WB-00470	【女性议题与舆论分化】又上热搜了，看评论区真的什么声音都有。	1	1	12	1	3	1
WB-00471	关于【平台算法推荐问题】这件事，大家关注点好像越来越偏了。	1	3	32	4	2	3
WB-00472	这两天刷到不少关于【城市生活成本上升】的讨论，说实话还挺唏嘘的。	1	3	31	1	2	4
WB-00473	关于【情绪价值消费】这件事，大家关注点好像越来越偏了。	1	2	22	3	3	3
WB-00474	不得不说，【影视改编争议】最近的讨论热度确实有点夸张。	1	2	21	1	2	3
WB-00475	关于【明星塌房后的舆论反转】这件事，大家关注点好像越来越偏了。	1	2	23	1	2	2
WB-00476	关于【短视频平台的流量机制】这件事，大家关注点好像越来越偏了。	1	3	32	2	1	4
WB-00477	关于【女性议题与舆论分化】这件事，大家关注点好像越来越偏了。	1	3	33	1	3	3
WB-00478	【读书博主推荐争议】又上热搜了，看评论区真的什么声音都有。	1	3	33	3	3	1
WB-00479	【情绪价值消费】又上热搜了，看评论区真的什么声音都有。	1	3	33	2	2	3
WB-00480	不得不说，【明星塌房后的舆论反转】最近的讨论热度确实有点夸张。	1	2	21	4	2	2
WB-00481	【知识付费是否值得】又上热搜了，看评论区真的什么声音都有。	1	3	31	2	3	4
WB-00482	关于【平台算法推荐问题】这件事，大家关注点好像越来越偏了。	1	1	12	2	3	4
WB-00483	【国产剧质量讨论】又上热搜了，看评论区真的什么声音都有。	1	3	32	2	2	4
WB-00484	【女性议题与舆论分化】又上热搜了，看评论区真的什么声音都有。	1	3	31	2	3	1
WB-00485	【年轻人就业与内卷】又上热搜了，看评论区真的什么声音都有。	1	1	14	3	1	3
WB-00486	不得不说，【年轻人就业与内卷】最近的讨论热度确实有点夸张。	1	1	14	2	2	1
WB-00487	不得不说，【知识付费是否值得】最近的讨论热度确实有点夸张。	1	2	24	2	3	2
WB-00488	【网红带货翻车事件】又上热搜了，看评论区真的什么声音都有。	1	2	24	1	2	2
WB-00489	关于【网红带货翻车事件】这件事，大家关注点好像越来越偏了。	1	3	33	3	1	4
WB-00490	不得不说，【年轻人就业与内卷】最近的讨论热度确实有点夸张。	1	2	24	3	1	2
WB-00491	不得不说，【公共事件中的信息透明度】最近的讨论热度确实有点夸张。	1	1	12	3	3	1
WB-00492	关于【情绪价值消费】这件事，大家关注点好像越来越偏了。	1	1	11	4	2	1
WB-00493	这两天刷到不少关于【AI写作与创作者焦虑】的讨论，说实话还挺唏嘘的。	1	2	23	1	2	3
WB-00494	关于【公共事件中的信息透明度】这件事，大家关注点好像越来越偏了。	1	3	31	3	2	3
WB-00495	不得不说，【公共事件中的信息透明度】最近的讨论热度确实有点夸张。	1	2	23	3	1	4
WB-00496	【女性议题与舆论分化】又上热搜了，看评论区真的什么声音都有。	1	3	32	1	1	4
WB-00497	关于【平台算法推荐问题】这件事，大家关注点好像越来越偏了。	1	2	24	2	2	4
WB-00498	不得不说，【短视频平台的流量机制】最近的讨论热度确实有点夸张。	1	3	32	4	1	4
WB-00499	这两天刷到不少关于【年度爆款综艺】的讨论，说实话还挺唏嘘的。	1	3	32	4	3	1
WB-00500	关于【读书博主推荐争议】这件事，大家关注点好像越来越偏了。	1	3	32	3	3	1
WB-00501	不得不说，【城市生活成本上升】最近的讨论热度确实有点夸张。	1	3	33	3	2	1
WB-00502	关于【国产剧质量讨论】这件事，大家关注点好像越来越偏了。	1	3	31	3	1	3
WB-00503	关于【短视频平台的流量机制】这件事，大家关注点好像越来越偏了。	1	3	32	3	2	2
WB-00504	不得不说，【年度爆款综艺】最近的讨论热度确实有点夸张。	1	3	33	3	3	2
WB-00505	这两天刷到不少关于【情绪价值消费】的讨论，说实话还挺唏嘘的。	1	3	32	1	1	2
WB-00506	不得不说，【情绪价值消费】最近的讨论热度确实有点夸张。	1	2	24	4	2	2
WB-00507	【情绪价值消费】又上热搜了，看评论区真的什么声音都有。	1	2	21	3	2	1
WB-00508	不得不说，【读书博主推荐争议】最近的讨论热度确实有点夸张。	1	1	11	3	1	2
WB-00509	关于【短视频平台的流量机制】这件事，大家关注点好像越来越偏了。	1	3	33	1	3	2
WB-00510	关于【短视频平台的流量机制】这件事，大家关注点好像越来越偏了。	1	3	32	2	2	4
WB-00511	【公共事件中的信息透明度】又上热搜了，看评论区真的什么声音都有。	1	3	33	4	1	3
WB-00512	这两天刷到不少关于【平台算法推荐问题】的讨论，说实话还挺唏嘘的。	1	2	22	1	3	4
WB-00513	关于【读书博主推荐争议】这件事，大家关注点好像越来越偏了。	1	2	22	2	3	2
WB-00514	这两天刷到不少关于【知识付费是否值得】的讨论，说实话还挺唏嘘的。	1	1	11	2	2	3
WB-00515	这两天刷到不少关于【短视频平台的流量机制】的讨论，说实话还挺唏嘘的。	1	2	23	1	3	2
WB-00516	这两天刷到不少关于【平台算法推荐问题】的讨论，说实话还挺唏嘘的。	1	3	33	4	1	1
WB-00517	不得不说，【短视频平台的流量机制】最近的讨论热度确实有点夸张。	1	3	33	2	3	4
WB-00518	关于【女性议题与舆论分化】这件事，大家关注点好像越来越偏了。	1	1	12	1	3	2
WB-00519	不得不说，【影视改编争议】最近的讨论热度确实有点夸张。	1	3	32	2	3	4
WB-00520	这两天刷到不少关于【年轻人就业与内卷】的讨论，说实话还挺唏嘘的。	1	3	31	3	3	4
WB-00521	【明星塌房后的舆论反转】又上热搜了，看评论区真的什么声音都有。	1	3	33	1	3	4
WB-00522	【情绪价值消费】又上热搜了，看评论区真的什么声音都有。	1	3	33	2	2	4
WB-00523	不得不说，【知识付费是否值得】最近的讨论热度确实有点夸张。	1	1	13	4	2	2
WB-00524	不得不说，【AI写作与创作者焦虑】最近的讨论热度确实有点夸张。	1	1	13	4	2	1
WB-00525	不得不说，【国产剧质量讨论】最近的讨论热度确实有点夸张。	1	2	24	4	3	1
WB-00526	关于【城市生活成本上升】这件事，大家关注点好像越来越偏了。	1	3	33	3	3	1
WB-00527	【国产剧质量讨论】又上热搜了，看评论区真的什么声音都有。	1	1	12	3	3	1
WB-00528	这两天刷到不少关于【网络暴力与理性讨论】的讨论，说实话还挺唏嘘的。	1	3	31	4	3	1
WB-00529	关于【读书博主推荐争议】这件事，大家关注点好像越来越偏了。	1	3	33	4	1	2
WB-00530	不得不说，【年轻人就业与内卷】最近的讨论热度确实有点夸张。	1	2	21	2	1	4
WB-00531	这两天刷到不少关于【网红带货翻车事件】的讨论，说实话还挺唏嘘的。	1	1	13	1	1	2
WB-00532	关于【城市生活成本上升】这件事，大家关注点好像越来越偏了。	1	1	14	1	3	2
WB-00533	【情绪价值消费】又上热搜了，看评论区真的什么声音都有。	1	3	31	4	2	1
WB-00534	【短视频平台的流量机制】又上热搜了，看评论区真的什么声音都有。	1	3	32	2	2	2
WB-00535	不得不说，【年度爆款综艺】最近的讨论热度确实有点夸张。	1	3	33	3	2	2
WB-00536	这两天刷到不少关于【读书博主推荐争议】的讨论，说实话还挺唏嘘的。	1	2	21	3	1	1
WB-00537	【女性议题与舆论分化】又上热搜了，看评论区真的什么声音都有。	1	2	22	3	2	3
WB-00538	关于【影视改编争议】这件事，大家关注点好像越来越偏了。	1	1	13	1	2	2
WB-00539	不得不说，【城市生活成本上升】最近的讨论热度确实有点夸张。	1	3	32	2	3	3
WB-00540	【平台算法推荐问题】又上热搜了，看评论区真的什么声音都有。	1	3	31	2	3	2
WB-00541	这两天刷到不少关于【情绪价值消费】的讨论，说实话还挺唏嘘的。	1	3	31	4	2	2
WB-00542	这两天刷到不少关于【公共事件中的信息透明度】的讨论，说实话还挺唏嘘的。	1	1	12	4	2	1
WB-00543	这两天刷到不少关于【知识付费是否值得】的讨论，说实话还挺唏嘘的。	1	2	23	3	1	4
WB-00544	不得不说，【明星塌房后的舆论反转】最近的讨论热度确实有点夸张。	1	2	21	2	1	4
WB-00545	关于【年轻人就业与内卷】这件事，大家关注点好像越来越偏了。	1	2	22	2	1	2
WB-00546	【知识付费是否值得】又上热搜了，看评论区真的什么声音都有。	1	1	12	3	2	4
WB-00547	关于【读书博主推荐争议】这件事，大家关注点好像越来越偏了。	1	1	12	1	1	1
WB-00548	不得不说，【女性议题与舆论分化】最近的讨论热度确实有点夸张。	1	3	32	2	1	1
WB-00549	这两天刷到不少关于【网络暴力与理性讨论】的讨论，说实话还挺唏嘘的。	1	2	22	2	2	1
WB-00550	这两天刷到不少关于【网红带货翻车事件】的讨论，说实话还挺唏嘘的。	1	2	22	4	2	3
WB-00551	关于【平台算法推荐问题】这件事，大家关注点好像越来越偏了。	1	1	13	4	3	4
WB-00552	这两天刷到不少关于【国产剧质量讨论】的讨论，说实话还挺唏嘘的。	1	3	33	3	3	4
WB-00553	【年度爆款综艺】又上热搜了，看评论区真的什么声音都有。	1	1	11	4	1	2
WB-00554	【网红带货翻车事件】又上热搜了，看评论区真的什么声音都有。	1	1	14	3	1	1
WB-00555	不得不说，【平台算法推荐问题】最近的讨论热度确实有点夸张。	1	1	14	1	3	1
WB-00556	【明星塌房后的舆论反转】又上热搜了，看评论区真的什么声音都有。	1	3	33	1	3	1
WB-00557	【网络暴力与理性讨论】又上热搜了，看评论区真的什么声音都有。	1	2	23	3	1	1
WB-00558	【读书博主推荐争议】又上热搜了，看评论区真的什么声音都有。	1	1	11	1	1	2
WB-00559	不得不说，【情绪价值消费】最近的讨论热度确实有点夸张。	1	3	31	3	3	4
WB-00560	这两天刷到不少关于【影视改编争议】的讨论，说实话还挺唏嘘的。	1	3	33	4	1	2
WB-00561	【平台算法推荐问题】又上热搜了，看评论区真的什么声音都有。	1	2	24	4	1	2
WB-00562	【网红带货翻车事件】又上热搜了，看评论区真的什么声音都有。	1	1	13	4	3	1
WB-00563	关于【知识付费是否值得】这件事，大家关注点好像越来越偏了。	1	3	32	2	3	4
WB-00564	这两天刷到不少关于【知识付费是否值得】的讨论，说实话还挺唏嘘的。	1	2	24	2	3	4
WB-00565	这两天刷到不少关于【平台算法推荐问题】的讨论，说实话还挺唏嘘的。	1	3	32	1	1	3
WB-00566	这两天刷到不少关于【公共事件中的信息透明度】的讨论，说实话还挺唏嘘的。	1	3	31	4	3	3
WB-00567	不得不说，【明星塌房后的舆论反转】最近的讨论热度确实有点夸张。	1	3	32	4	3	1
WB-00568	关于【网络暴力与理性讨论】这件事，大家关注点好像越来越偏了。	1	2	22	1	1	1
WB-00569	这两天刷到不少关于【平台算法推荐问题】的讨论，说实话还挺唏嘘的。	1	1	14	2	3	4
WB-00570	不得不说，【网红带货翻车事件】最近的讨论热度确实有点夸张。	1	1	12	2	2	2
WB-00571	这两天刷到不少关于【女性议题与舆论分化】的讨论，说实话还挺唏嘘的。	1	2	22	4	3	4
WB-00572	这两天刷到不少关于【公共事件中的信息透明度】的讨论，说实话还挺唏嘘的。	1	3	33	2	1	2
WB-00573	不得不说，【网络暴力与理性讨论】最近的讨论热度确实有点夸张。	1	3	32	1	3	2
WB-00574	关于【情绪价值消费】这件事，大家关注点好像越来越偏了。	1	2	21	2	2	2
WB-00575	这两天刷到不少关于【知识付费是否值得】的讨论，说实话还挺唏嘘的。	1	1	13	3	2	3
WB-00576	不得不说，【平台算法推荐问题】最近的讨论热度确实有点夸张。	1	3	31	1	1	3
WB-00577	关于【明星塌房后的舆论反转】这件事，大家关注点好像越来越偏了。	1	3	32	4	1	1
WB-00578	不得不说，【AI写作与创作者焦虑】最近的讨论热度确实有点夸张。	1	1	13	4	3	1
WB-00579	关于【网红带货翻车事件】这件事，大家关注点好像越来越偏了。	1	3	31	1	3	4
WB-00580	关于【网红带货翻车事件】这件事，大家关注点好像越来越偏了。	1	3	32	3	3	3
WB-00581	【国产剧质量讨论】又上热搜了，看评论区真的什么声音都有。	1	1	13	4	1	3
WB-00582	关于【年轻人就业与内卷】这件事，大家关注点好像越来越偏了。	1	1	11	1	2	1
WB-00583	不得不说，【城市生活成本上升】最近的讨论热度确实有点夸张。	1	2	22	1	2	4
WB-00584	不得不说，【城市生活成本上升】最近的讨论热度确实有点夸张。	1	2	24	3	1	2
WB-00585	关于【读书博主推荐争议】这件事，大家关注点好像越来越偏了。	1	2	22	3	1	3
WB-00586	这两天刷到不少关于【短视频平台的流量机制】的讨论，说实话还挺唏嘘的。	1	3	32	4	1	3
WB-00587	这两天刷到不少关于【平台算法推荐问题】的讨论，说实话还挺唏嘘的。	1	3	31	2	1	1
WB-00588	不得不说，【年轻人就业与内卷】最近的讨论热度确实有点夸张。	1	1	14	2	3	4
WB-00589	关于【国产剧质量讨论】这件事，大家关注点好像越来越偏了。	1	3	32	2	3	4
WB-00590	【国产剧质量讨论】又上热搜了，看评论区真的什么声音都有。	1	3	33	3	2	1
WB-00591	【AI写作与创作者焦虑】又上热搜了，看评论区真的什么声音都有。	1	2	24	3	3	1
WB-00592	【平台算法推荐问题】又上热搜了，看评论区真的什么声音都有。	1	1	11	2	1	2
WB-00593	关于【网红带货翻车事件】这件事，大家关注点好像越来越偏了。	1	1	12	3	3	1
WB-00594	关于【明星塌房后的舆论反转】这件事，大家关注点好像越来越偏了。	1	2	22	1	3	3
WB-00595	关于【年度爆款综艺】这件事，大家关注点好像越来越偏了。	1	2	22	3	2	4
WB-00596	【读书博主推荐争议】又上热搜了，看评论区真的什么声音都有。	1	2	23	1	2	1
WB-00597	关于【网红带货翻车事件】这件事，大家关注点好像越来越偏了。	1	1	11	4	2	4
WB-00598	这两天刷到不少关于【影视改编争议】的讨论，说实话还挺唏嘘的。	1	1	12	1	1	4
WB-00599	不得不说，【明星塌房后的舆论反转】最近的讨论热度确实有点夸张。	1	3	33	4	3	1
WB-00600	不得不说，【网红带货翻车事件】最近的讨论热度确实有点夸张。	1	1	12	4	1	3
WB-00601	这两天刷到不少关于【网络暴力与理性讨论】的讨论，说实话还挺唏嘘的。	1	3	31	1	1	3
WB-00602	【影视改编争议】又上热搜了，看评论区真的什么声音都有。	1	1	14	1	2	2
WB-00603	不得不说，【城市生活成本上升】最近的讨论热度确实有点夸张。	1	3	31	1	1	1
WB-00604	不得不说，【情绪价值消费】最近的讨论热度确实有点夸张。	1	2	24	2	3	4
WB-00605	不得不说，【国产剧质量讨论】最近的讨论热度确实有点夸张。	1	2	21	1	1	2
WB-00606	【年轻人就业与内卷】又上热搜了，看评论区真的什么声音都有。	1	3	33	2	3	2
WB-00607	【国产剧质量讨论】又上热搜了，看评论区真的什么声音都有。	1	1	11	3	3	4
WB-00608	【公共事件中的信息透明度】又上热搜了，看评论区真的什么声音都有。	1	3	32	1	3	4
WB-00609	【年度爆款综艺】又上热搜了，看评论区真的什么声音都有。	1	1	12	3	3	3
WB-00610	关于【平台算法推荐问题】这件事，大家关注点好像越来越偏了。	1	1	14	1	3	4
WB-00611	不得不说，【年轻人就业与内卷】最近的讨论热度确实有点夸张。	1	1	11	3	2	4
WB-00612	关于【公共事件中的信息透明度】这件事，大家关注点好像越来越偏了。	1	3	33	1	2	4
WB-00613	【知识付费是否值得】又上热搜了，看评论区真的什么声音都有。	1	1	11	3	1	3
WB-00614	关于【读书博主推荐争议】这件事，大家关注点好像越来越偏了。	1	3	31	1	3	3
WB-00615	【城市生活成本上升】又上热搜了，看评论区真的什么声音都有。	1	1	14	1	1	4
WB-00616	关于【影视改编争议】这件事，大家关注点好像越来越偏了。	1	3	33	4	3	4
WB-00617	【平台算法推荐问题】又上热搜了，看评论区真的什么声音都有。	1	1	12	4	3	1
WB-00618	关于【读书博主推荐争议】这件事，大家关注点好像越来越偏了。	1	1	12	4	2	3
WB-00619	这两天刷到不少关于【AI写作与创作者焦虑】的讨论，说实话还挺唏嘘的。	1	1	12	3	2	3
WB-00620	【情绪价值消费】又上热搜了，看评论区真的什么声音都有。	1	3	31	2	1	2
WB-00621	【知识付费是否值得】又上热搜了，看评论区真的什么声音都有。	1	1	12	1	1	3
WB-00622	不得不说，【读书博主推荐争议】最近的讨论热度确实有点夸张。	1	1	13	2	3	2
WB-00623	【读书博主推荐争议】又上热搜了，看评论区真的什么声音都有。	1	3	33	2	2	1
WB-00624	不得不说，【平台算法推荐问题】最近的讨论热度确实有点夸张。	1	3	31	2	1	3
WB-00625	关于【国产剧质量讨论】这件事，大家关注点好像越来越偏了。	1	3	31	2	3	1
WB-00626	不得不说，【年度爆款综艺】最近的讨论热度确实有点夸张。	1	3	33	1	3	4
WB-00627	【年轻人就业与内卷】又上热搜了，看评论区真的什么声音都有。	1	2	22	4	1	4
WB-00628	不得不说，【读书博主推荐争议】最近的讨论热度确实有点夸张。	1	2	23	4	1	3
WB-00629	这两天刷到不少关于【读书博主推荐争议】的讨论，说实话还挺唏嘘的。	1	2	23	2	1	3
WB-00630	这两天刷到不少关于【明星塌房后的舆论反转】的讨论，说实话还挺唏嘘的。	1	3	32	1	2	4
WB-00631	这两天刷到不少关于【读书博主推荐争议】的讨论，说实话还挺唏嘘的。	1	2	22	1	2	2
WB-00632	不得不说，【城市生活成本上升】最近的讨论热度确实有点夸张。	1	2	21	4	3	3
WB-00633	关于【城市生活成本上升】这件事，大家关注点好像越来越偏了。	1	2	24	2	2	1
WB-00634	不得不说，【AI写作与创作者焦虑】最近的讨论热度确实有点夸张。	1	3	31	3	2	4
WB-00635	【读书博主推荐争议】又上热搜了，看评论区真的什么声音都有。	1	2	22	2	3	3
WB-00636	【女性议题与舆论分化】又上热搜了，看评论区真的什么声音都有。	1	3	31	2	1	3
WB-00637	这两天刷到不少关于【读书博主推荐争议】的讨论，说实话还挺唏嘘的。	1	3	32	4	2	2
WB-00638	【网红带货翻车事件】又上热搜了，看评论区真的什么声音都有。	1	1	14	1	3	3
WB-00639	不得不说，【影视改编争议】最近的讨论热度确实有点夸张。	1	2	22	4	3	4
WB-00640	这两天刷到不少关于【知识付费是否值得】的讨论，说实话还挺唏嘘的。	1	1	13	1	1	2
WB-00641	这两天刷到不少关于【网络暴力与理性讨论】的讨论，说实话还挺唏嘘的。	1	2	24	1	2	4
WB-00642	关于【知识付费是否值得】这件事，大家关注点好像越来越偏了。	1	3	33	2	3	1
WB-00643	这两天刷到不少关于【网络暴力与理性讨论】的讨论，说实话还挺唏嘘的。	1	2	21	4	1	2
WB-00644	关于【知识付费是否值得】这件事，大家关注点好像越来越偏了。	1	2	22	2	1	4
WB-00645	关于【年轻人就业与内卷】这件事，大家关注点好像越来越偏了。	1	3	32	1	3	1
WB-00646	【年轻人就业与内卷】又上热搜了，看评论区真的什么声音都有。	1	1	13	4	3	2
WB-00647	这两天刷到不少关于【年度爆款综艺】的讨论，说实话还挺唏嘘的。	1	2	21	1	1	4
WB-00648	这两天刷到不少关于【年度爆款综艺】的讨论，说实话还挺唏嘘的。	1	3	32	2	2	2
WB-00649	不得不说，【网络暴力与理性讨论】最近的讨论热度确实有点夸张。	1	1	12	1	2	1
WB-00650	关于【知识付费是否值得】这件事，大家关注点好像越来越偏了。	1	1	12	4	3	3
WB-00651	关于【年轻人就业与内卷】这件事，大家关注点好像越来越偏了。	1	1	14	4	3	4
WB-00652	【网红带货翻车事件】又上热搜了，看评论区真的什么声音都有。	1	2	21	3	2	2
WB-00653	这两天刷到不少关于【读书博主推荐争议】的讨论，说实话还挺唏嘘的。	1	2	22	2	1	4
WB-00654	【平台算法推荐问题】又上热搜了，看评论区真的什么声音都有。	1	3	32	2	1	3
WB-00655	【短视频平台的流量机制】又上热搜了，看评论区真的什么声音都有。	1	1	14	3	1	4
WB-00656	【AI写作与创作者焦虑】又上热搜了，看评论区真的什么声音都有。	1	3	33	3	2	2
WB-00657	【读书博主推荐争议】又上热搜了，看评论区真的什么声音都有。	1	2	24	1	2	4
WB-00658	关于【平台算法推荐问题】这件事，大家关注点好像越来越偏了。	1	2	22	1	3	3
WB-00659	【影视改编争议】又上热搜了，看评论区真的什么声音都有。	1	2	24	2	2	2
WB-00660	不得不说，【明星塌房后的舆论反转】最近的讨论热度确实有点夸张。	1	1	11	4	3	1
WB-00661	关于【年轻人就业与内卷】这件事，大家关注点好像越来越偏了。	1	2	21	2	3	1
WB-00662	不得不说，【影视改编争议】最近的讨论热度确实有点夸张。	1	1	12	1	3	4
WB-00663	这两天刷到不少关于【城市生活成本上升】的讨论，说实话还挺唏嘘的。	1	2	21	3	3	4
WB-00664	【女性议题与舆论分化】又上热搜了，看评论区真的什么声音都有。	1	2	22	4	2	3
WB-00665	不得不说，【女性议题与舆论分化】最近的讨论热度确实有点夸张。	1	1	13	1	3	3
WB-00666	关于【网络暴力与理性讨论】这件事，大家关注点好像越来越偏了。	1	2	24	4	3	1
WB-00667	【平台算法推荐问题】又上热搜了，看评论区真的什么声音都有。	1	2	22	2	1	4
WB-00668	【影视改编争议】又上热搜了，看评论区真的什么声音都有。	1	2	22	2	3	3
WB-00669	这两天刷到不少关于【平台算法推荐问题】的讨论，说实话还挺唏嘘的。	1	3	32	3	2	4
WB-00670	关于【短视频平台的流量机制】这件事，大家关注点好像越来越偏了。	1	2	23	2	2	3
WB-00671	不得不说，【网络暴力与理性讨论】最近的讨论热度确实有点夸张。	1	3	32	1	1	4
WB-00672	不得不说，【短视频平台的流量机制】最近的讨论热度确实有点夸张。	1	1	13	2	3	2
WB-00673	【城市生活成本上升】又上热搜了，看评论区真的什么声音都有。	1	1	12	4	1	3
WB-00674	关于【女性议题与舆论分化】这件事，大家关注点好像越来越偏了。	1	3	31	3	1	4
WB-00675	这两天刷到不少关于【年度爆款综艺】的讨论，说实话还挺唏嘘的。	1	3	33	2	2	2
WB-00676	不得不说，【明星塌房后的舆论反转】最近的讨论热度确实有点夸张。	1	2	22	1	3	1
WB-00677	不得不说，【短视频平台的流量机制】最近的讨论热度确实有点夸张。	1	1	11	3	1	4
WB-00678	关于【公共事件中的信息透明度】这件事，大家关注点好像越来越偏了。	1	1	14	2	2	2
WB-00679	不得不说，【年轻人就业与内卷】最近的讨论热度确实有点夸张。	1	3	31	1	1	3
WB-00680	关于【年度爆款综艺】这件事，大家关注点好像越来越偏了。	1	1	11	2	2	1
WB-00681	这两天刷到不少关于【公共事件中的信息透明度】的讨论，说实话还挺唏嘘的。	1	1	14	2	1	4
WB-00682	【情绪价值消费】又上热搜了，看评论区真的什么声音都有。	1	3	32	1	3	4
WB-00683	这两天刷到不少关于【年度爆款综艺】的讨论，说实话还挺唏嘘的。	1	3	33	2	2	2
WB-00684	这两天刷到不少关于【情绪价值消费】的讨论，说实话还挺唏嘘的。	1	3	32	2	1	1
WB-00685	关于【网红带货翻车事件】这件事，大家关注点好像越来越偏了。	1	2	24	4	2	1
WB-00686	不得不说，【影视改编争议】最近的讨论热度确实有点夸张。	1	3	31	4	2	2
WB-00687	【明星塌房后的舆论反转】又上热搜了，看评论区真的什么声音都有。	1	2	23	3	2	2
WB-00688	这两天刷到不少关于【女性议题与舆论分化】的讨论，说实话还挺唏嘘的。	1	3	33	3	2	3
WB-00689	不得不说，【读书博主推荐争议】最近的讨论热度确实有点夸张。	1	3	33	2	3	2
WB-00690	这两天刷到不少关于【读书博主推荐争议】的讨论，说实话还挺唏嘘的。	1	1	13	3	2	4
WB-00691	不得不说，【明星塌房后的舆论反转】最近的讨论热度确实有点夸张。	1	2	22	4	2	3
WB-00692	这两天刷到不少关于【读书博主推荐争议】的讨论，说实话还挺唏嘘的。	1	1	11	1	1	4
WB-00693	不得不说，【国产剧质量讨论】最近的讨论热度确实有点夸张。	1	3	31	4	2	1
WB-00694	关于【影视改编争议】这件事，大家关注点好像越来越偏了。	1	2	21	2	3	3
WB-00695	不得不说，【短视频平台的流量机制】最近的讨论热度确实有点夸张。	1	2	22	4	1	4
WB-00696	【情绪价值消费】又上热搜了，看评论区真的什么声音都有。	1	3	32	4	2	1
WB-00697	关于【明星塌房后的舆论反转】这件事，大家关注点好像越来越偏了。	1	1	14	3	2	3
WB-00698	【年轻人就业与内卷】又上热搜了，看评论区真的什么声音都有。	1	3	32	1	3	2
WB-00699	【年度爆款综艺】又上热搜了，看评论区真的什么声音都有。	1	1	13	1	1	3
WB-00700	关于【读书博主推荐争议】这件事，大家关注点好像越来越偏了。	1	1	11	3	2	2
WB-00701	关于【明星塌房后的舆论反转】这件事，大家关注点好像越来越偏了。	1	2	23	4	3	1
WB-00702	【城市生活成本上升】又上热搜了，看评论区真的什么声音都有。	1	3	32	2	2	3
WB-00703	这两天刷到不少关于【国产剧质量讨论】的讨论，说实话还挺唏嘘的。	1	2	22	4	2	1
WB-00704	关于【读书博主推荐争议】这件事，大家关注点好像越来越偏了。	1	3	32	1	2	4
WB-00705	这两天刷到不少关于【知识付费是否值得】的讨论，说实话还挺唏嘘的。	1	3	31	1	3	3
WB-00706	不得不说，【国产剧质量讨论】最近的讨论热度确实有点夸张。	1	1	14	1	2	2
WB-00707	关于【情绪价值消费】这件事，大家关注点好像越来越偏了。	1	3	31	3	3	2
WB-00708	【公共事件中的信息透明度】又上热搜了，看评论区真的什么声音都有。	1	2	22	3	1	2
WB-00709	关于【女性议题与舆论分化】这件事，大家关注点好像越来越偏了。	1	3	33	2	3	2
WB-00710	这两天刷到不少关于【网红带货翻车事件】的讨论，说实话还挺唏嘘的。	1	2	21	1	1	4
WB-00711	关于【情绪价值消费】这件事，大家关注点好像越来越偏了。	1	1	13	2	2	3
WB-00712	不得不说，【年轻人就业与内卷】最近的讨论热度确实有点夸张。	1	1	12	3	1	2
WB-00713	不得不说，【情绪价值消费】最近的讨论热度确实有点夸张。	1	2	23	1	2	4
WB-00714	这两天刷到不少关于【城市生活成本上升】的讨论，说实话还挺唏嘘的。	1	1	12	3	3	1
WB-00715	这两天刷到不少关于【女性议题与舆论分化】的讨论，说实话还挺唏嘘的。	1	3	31	3	2	2
WB-00716	这两天刷到不少关于【AI写作与创作者焦虑】的讨论，说实话还挺唏嘘的。	1	1	11	4	3	2
WB-00717	关于【公共事件中的信息透明度】这件事，大家关注点好像越来越偏了。	1	1	12	1	1	2
WB-00718	【年轻人就业与内卷】又上热搜了，看评论区真的什么声音都有。	1	1	12	1	1	3
WB-00719	关于【国产剧质量讨论】这件事，大家关注点好像越来越偏了。	1	1	11	4	1	2
WB-00720	这两天刷到不少关于【短视频平台的流量机制】的讨论，说实话还挺唏嘘的。	1	3	33	1	2	3
WB-00721	【年度爆款综艺】又上热搜了，看评论区真的什么声音都有。	1	2	24	1	2	2
WB-00722	【知识付费是否值得】又上热搜了，看评论区真的什么声音都有。	1	3	32	4	2	3
WB-00723	【城市生活成本上升】又上热搜了，看评论区真的什么声音都有。	1	1	14	2	2	1
WB-00724	【女性议题与舆论分化】又上热搜了，看评论区真的什么声音都有。	1	3	32	1	1	2
WB-00725	【年度爆款综艺】又上热搜了，看评论区真的什么声音都有。	1	1	12	1	2	2
WB-00726	这两天刷到不少关于【网红带货翻车事件】的讨论，说实话还挺唏嘘的。	1	3	32	1	3	3
WB-00727	【AI写作与创作者焦虑】又上热搜了，看评论区真的什么声音都有。	1	2	24	4	3	1
WB-00728	这两天刷到不少关于【明星塌房后的舆论反转】的讨论，说实话还挺唏嘘的。	1	3	31	2	1	4
WB-00729	关于【女性议题与舆论分化】这件事，大家关注点好像越来越偏了。	1	2	21	2	1	3
WB-00730	不得不说，【知识付费是否值得】最近的讨论热度确实有点夸张。	1	3	33	4	3	1
WB-00731	这两天刷到不少关于【网红带货翻车事件】的讨论，说实话还挺唏嘘的。	1	1	12	4	3	1
WB-00732	【影视改编争议】又上热搜了，看评论区真的什么声音都有。	1	3	31	3	2	1
WB-00733	这两天刷到不少关于【情绪价值消费】的讨论，说实话还挺唏嘘的。	1	1	14	1	2	3
WB-00734	不得不说，【国产剧质量讨论】最近的讨论热度确实有点夸张。	1	3	32	4	2	2
WB-00735	不得不说，【年度爆款综艺】最近的讨论热度确实有点夸张。	1	1	13	3	1	1
WB-00736	【短视频平台的流量机制】又上热搜了，看评论区真的什么声音都有。	1	2	23	1	2	2
WB-00737	这两天刷到不少关于【明星塌房后的舆论反转】的讨论，说实话还挺唏嘘的。	1	3	33	1	1	1
WB-00738	关于【平台算法推荐问题】这件事，大家关注点好像越来越偏了。	1	2	23	2	3	3
WB-00739	不得不说，【明星塌房后的舆论反转】最近的讨论热度确实有点夸张。	1	2	22	4	2	2
WB-00740	【年轻人就业与内卷】又上热搜了，看评论区真的什么声音都有。	1	3	31	4	1	3
WB-00741	不得不说，【读书博主推荐争议】最近的讨论热度确实有点夸张。	1	1	13	4	3	2
WB-00742	【情绪价值消费】又上热搜了，看评论区真的什么声音都有。	1	3	31	4	1	3
WB-00743	【AI写作与创作者焦虑】又上热搜了，看评论区真的什么声音都有。	1	2	21	2	3	2
WB-00744	这两天刷到不少关于【网络暴力与理性讨论】的讨论，说实话还挺唏嘘的。	1	3	32	2	1	3
WB-00745	不得不说，【平台算法推荐问题】最近的讨论热度确实有点夸张。	1	2	24	4	3	1
WB-00746	【年轻人就业与内卷】又上热搜了，看评论区真的什么声音都有。	1	1	12	4	3	2
WB-00747	关于【国产剧质量讨论】这件事，大家关注点好像越来越偏了。	1	2	21	2	3	3
WB-00748	这两天刷到不少关于【知识付费是否值得】的讨论，说实话还挺唏嘘的。	1	3	31	3	1	3
WB-00749	不得不说，【AI写作与创作者焦虑】最近的讨论热度确实有点夸张。	1	1	14	4	3	4
WB-00750	不得不说，【女性议题与舆论分化】最近的讨论热度确实有点夸张。	1	3	33	2	2	3
WB-00751	关于【年度爆款综艺】这件事，大家关注点好像越来越偏了。	1	3	32	3	3	3
WB-00752	关于【短视频平台的流量机制】这件事，大家关注点好像越来越偏了。	1	2	21	3	2	4
WB-00753	关于【知识付费是否值得】这件事，大家关注点好像越来越偏了。	1	1	12	3	3	2
WB-00754	这两天刷到不少关于【读书博主推荐争议】的讨论，说实话还挺唏嘘的。	1	2	22	4	3	4
WB-00755	这两天刷到不少关于【年轻人就业与内卷】的讨论，说实话还挺唏嘘的。	1	3	33	2	1	4
WB-00756	关于【短视频平台的流量机制】这件事，大家关注点好像越来越偏了。	1	2	24	4	1	4
WB-00757	这两天刷到不少关于【AI写作与创作者焦虑】的讨论，说实话还挺唏嘘的。	1	1	12	3	2	3
WB-00758	关于【年轻人就业与内卷】这件事，大家关注点好像越来越偏了。	1	3	32	4	2	4
WB-00759	【年度爆款综艺】又上热搜了，看评论区真的什么声音都有。	1	2	24	2	2	2
WB-00760	【年度爆款综艺】又上热搜了，看评论区真的什么声音都有。	1	2	23	1	3	4
WB-00761	关于【情绪价值消费】这件事，大家关注点好像越来越偏了。	1	3	31	3	2	3
WB-00762	不得不说，【情绪价值消费】最近的讨论热度确实有点夸张。	1	1	14	3	3	1
WB-00763	关于【网络暴力与理性讨论】这件事，大家关注点好像越来越偏了。	1	1	13	2	2	3
WB-00764	这两天刷到不少关于【国产剧质量讨论】的讨论，说实话还挺唏嘘的。	1	1	12	4	2	3
WB-00765	关于【公共事件中的信息透明度】这件事，大家关注点好像越来越偏了。	1	3	33	2	3	4
WB-00766	这两天刷到不少关于【公共事件中的信息透明度】的讨论，说实话还挺唏嘘的。	1	2	22	1	1	4
WB-00767	关于【网红带货翻车事件】这件事，大家关注点好像越来越偏了。	1	3	31	2	1	4
WB-00768	这两天刷到不少关于【短视频平台的流量机制】的讨论，说实话还挺唏嘘的。	1	3	33	4	3	4
WB-00769	不得不说，【影视改编争议】最近的讨论热度确实有点夸张。	1	3	32	1	2	2
WB-00770	这两天刷到不少关于【情绪价值消费】的讨论，说实话还挺唏嘘的。	1	3	33	1	3	3
WB-00771	这两天刷到不少关于【短视频平台的流量机制】的讨论，说实话还挺唏嘘的。	1	1	13	4	3	2
WB-00772	这两天刷到不少关于【年度爆款综艺】的讨论，说实话还挺唏嘘的。	1	2	22	1	3	1
WB-00773	不得不说，【年轻人就业与内卷】最近的讨论热度确实有点夸张。	1	3	33	3	2	4
WB-00774	【年轻人就业与内卷】又上热搜了，看评论区真的什么声音都有。	1	1	13	4	1	3
WB-00775	【知识付费是否值得】又上热搜了，看评论区真的什么声音都有。	1	3	31	2	1	4
WB-00776	【影视改编争议】又上热搜了，看评论区真的什么声音都有。	1	3	31	2	1	2
WB-00777	【影视改编争议】又上热搜了，看评论区真的什么声音都有。	1	2	22	1	2	1
WB-00778	不得不说，【网络暴力与理性讨论】最近的讨论热度确实有点夸张。	1	1	13	3	3	1
WB-00779	关于【公共事件中的信息透明度】这件事，大家关注点好像越来越偏了。	1	3	33	4	1	3
WB-00780	关于【影视改编争议】这件事，大家关注点好像越来越偏了。	1	2	23	3	3	1
WB-00781	关于【年度爆款综艺】这件事，大家关注点好像越来越偏了。	1	3	33	4	3	1
WB-00782	这两天刷到不少关于【情绪价值消费】的讨论，说实话还挺唏嘘的。	1	2	22	2	3	3
WB-00783	这两天刷到不少关于【网络暴力与理性讨论】的讨论，说实话还挺唏嘘的。	1	3	33	1	3	1
WB-00784	关于【城市生活成本上升】这件事，大家关注点好像越来越偏了。	1	2	21	2	3	1
WB-00785	不得不说，【影视改编争议】最近的讨论热度确实有点夸张。	1	2	22	2	1	1
WB-00786	【明星塌房后的舆论反转】又上热搜了，看评论区真的什么声音都有。	1	1	13	3	1	1
WB-00787	【网络暴力与理性讨论】又上热搜了，看评论区真的什么声音都有。	1	2	22	1	2	3
WB-00788	不得不说，【公共事件中的信息透明度】最近的讨论热度确实有点夸张。	1	1	11	4	1	4
WB-00789	关于【AI写作与创作者焦虑】这件事，大家关注点好像越来越偏了。	1	1	14	1	3	1
WB-00790	关于【平台算法推荐问题】这件事，大家关注点好像越来越偏了。	1	2	21	3	2	3
WB-00791	这两天刷到不少关于【网络暴力与理性讨论】的讨论，说实话还挺唏嘘的。	1	2	21	2	3	4
WB-00792	【影视改编争议】又上热搜了，看评论区真的什么声音都有。	1	1	12	4	2	3
WB-00793	关于【短视频平台的流量机制】这件事，大家关注点好像越来越偏了。	1	3	33	4	1	3
WB-00794	不得不说，【情绪价值消费】最近的讨论热度确实有点夸张。	1	2	24	1	2	4
WB-00795	这两天刷到不少关于【年度爆款综艺】的讨论，说实话还挺唏嘘的。	1	3	32	4	2	4
WB-00796	不得不说，【年度爆款综艺】最近的讨论热度确实有点夸张。	1	1	14	1	2	4
WB-00797	【读书博主推荐争议】又上热搜了，看评论区真的什么声音都有。	1	2	23	4	1	1
WB-00798	【公共事件中的信息透明度】又上热搜了，看评论区真的什么声音都有。	1	2	21	1	1	2
WB-00799	关于【读书博主推荐争议】这件事，大家关注点好像越来越偏了。	1	1	12	2	3	1
WB-00800	这两天刷到不少关于【女性议题与舆论分化】的讨论，说实话还挺唏嘘的。	1	2	21	4	2	1
WB-00801	【网络暴力与理性讨论】又上热搜了，看评论区真的什么声音都有。	1	1	13	3	2	2
WB-00802	【年度爆款综艺】又上热搜了，看评论区真的什么声音都有。	1	2	24	1	3	4
WB-00803	这两天刷到不少关于【女性议题与舆论分化】的讨论，说实话还挺唏嘘的。	1	2	21	2	3	3
WB-00804	【城市生活成本上升】又上热搜了，看评论区真的什么声音都有。	1	1	14	4	1	3
WB-00805	不得不说，【年轻人就业与内卷】最近的讨论热度确实有点夸张。	1	1	14	3	1	2
WB-00806	关于【读书博主推荐争议】这件事，大家关注点好像越来越偏了。	1	3	31	1	3	3
WB-00807	关于【网络暴力与理性讨论】这件事，大家关注点好像越来越偏了。	1	2	21	1	3	1
WB-00808	不得不说，【情绪价值消费】最近的讨论热度确实有点夸张。	1	3	33	3	1	3
WB-00809	这两天刷到不少关于【短视频平台的流量机制】的讨论，说实话还挺唏嘘的。	1	2	21	1	3	2
WB-00810	关于【国产剧质量讨论】这件事，大家关注点好像越来越偏了。	1	3	31	1	2	1
WB-00811	这两天刷到不少关于【短视频平台的流量机制】的讨论，说实话还挺唏嘘的。	1	3	31	1	3	4
WB-00812	关于【影视改编争议】这件事，大家关注点好像越来越偏了。	1	3	32	4	1	4
WB-00813	关于【城市生活成本上升】这件事，大家关注点好像越来越偏了。	1	2	21	2	1	1
WB-00814	【公共事件中的信息透明度】又上热搜了，看评论区真的什么声音都有。	1	3	31	3	3	3
WB-00815	【网络暴力与理性讨论】又上热搜了，看评论区真的什么声音都有。	1	2	22	4	3	3
WB-00816	【短视频平台的流量机制】又上热搜了，看评论区真的什么声音都有。	1	1	11	4	3	2
WB-00817	关于【情绪价值消费】这件事，大家关注点好像越来越偏了。	1	2	23	4	2	2
WB-00818	【知识付费是否值得】又上热搜了，看评论区真的什么声音都有。	1	2	21	1	3	2
WB-00819	关于【网红带货翻车事件】这件事，大家关注点好像越来越偏了。	1	2	24	1	1	3
WB-00820	不得不说，【城市生活成本上升】最近的讨论热度确实有点夸张。	1	1	14	1	3	3
WB-00821	【网络暴力与理性讨论】又上热搜了，看评论区真的什么声音都有。	1	3	32	2	1	2
WB-00822	【读书博主推荐争议】又上热搜了，看评论区真的什么声音都有。	1	1	13	2	1	1
WB-00823	不得不说，【网红带货翻车事件】最近的讨论热度确实有点夸张。	1	1	12	2	3	3
WB-00824	关于【网红带货翻车事件】这件事，大家关注点好像越来越偏了。	1	3	32	3	1	1
WB-00825	这两天刷到不少关于【读书博主推荐争议】的讨论，说实话还挺唏嘘的。	1	3	31	1	3	2
WB-00826	关于【平台算法推荐问题】这件事，大家关注点好像越来越偏了。	1	3	33	1	2	3
WB-00827	不得不说，【影视改编争议】最近的讨论热度确实有点夸张。	1	1	12	4	2	3
WB-00828	不得不说，【年度爆款综艺】最近的讨论热度确实有点夸张。	1	2	23	1	2	2
WB-00829	【年度爆款综艺】又上热搜了，看评论区真的什么声音都有。	1	3	32	4	2	4
WB-00830	【国产剧质量讨论】又上热搜了，看评论区真的什么声音都有。	1	1	14	1	1	4
WB-00831	这两天刷到不少关于【读书博主推荐争议】的讨论，说实话还挺唏嘘的。	1	1	12	2	1	4
WB-00832	【情绪价值消费】又上热搜了，看评论区真的什么声音都有。	1	3	33	3	2	2
WB-00833	不得不说，【影视改编争议】最近的讨论热度确实有点夸张。	1	1	12	1	2	4
WB-00834	关于【网红带货翻车事件】这件事，大家关注点好像越来越偏了。	1	2	22	3	3	1
WB-00835	这两天刷到不少关于【读书博主推荐争议】的讨论，说实话还挺唏嘘的。	1	3	32	4	3	4
WB-00836	不得不说，【AI写作与创作者焦虑】最近的讨论热度确实有点夸张。	1	3	32	1	3	3
WB-00837	不得不说，【情绪价值消费】最近的讨论热度确实有点夸张。	1	3	31	3	1	2
WB-00838	【公共事件中的信息透明度】又上热搜了，看评论区真的什么声音都有。	1	3	32	4	3	2
WB-00839	不得不说，【城市生活成本上升】最近的讨论热度确实有点夸张。	1	2	23	4	1	2
WB-00840	不得不说，【知识付费是否值得】最近的讨论热度确实有点夸张。	1	2	23	2	3	2
WB-00841	【短视频平台的流量机制】又上热搜了，看评论区真的什么声音都有。	1	2	22	3	1	1
WB-00842	关于【女性议题与舆论分化】这件事，大家关注点好像越来越偏了。	1	1	11	1	2	2
WB-00843	关于【影视改编争议】这件事，大家关注点好像越来越偏了。	1	3	32	2	1	3
WB-00844	【网红带货翻车事件】又上热搜了，看评论区真的什么声音都有。	1	3	32	3	3	4
WB-00845	关于【平台算法推荐问题】这件事，大家关注点好像越来越偏了。	1	1	11	4	3	4
WB-00846	这两天刷到不少关于【读书博主推荐争议】的讨论，说实话还挺唏嘘的。	1	3	32	4	2	4
WB-00847	不得不说，【女性议题与舆论分化】最近的讨论热度确实有点夸张。	1	1	11	4	1	2
WB-00848	关于【情绪价值消费】这件事，大家关注点好像越来越偏了。	1	3	32	2	2	2
WB-00849	关于【短视频平台的流量机制】这件事，大家关注点好像越来越偏了。	1	3	32	2	1	4
WB-00850	不得不说，【明星塌房后的舆论反转】最近的讨论热度确实有点夸张。	1	1	13	3	3	1
WB-00851	不得不说，【明星塌房后的舆论反转】最近的讨论热度确实有点夸张。	1	2	21	4	1	4
WB-00852	关于【读书博主推荐争议】这件事，大家关注点好像越来越偏了。	1	3	32	1	3	3
WB-00853	关于【知识付费是否值得】这件事，大家关注点好像越来越偏了。	1	1	12	2	2	4
WB-00854	【网红带货翻车事件】又上热搜了，看评论区真的什么声音都有。	1	1	12	3	3	2
WB-00855	不得不说，【情绪价值消费】最近的讨论热度确实有点夸张。	1	1	11	1	3	3
WB-00856	【国产剧质量讨论】又上热搜了，看评论区真的什么声音都有。	1	1	12	1	2	4
WB-00857	不得不说，【年轻人就业与内卷】最近的讨论热度确实有点夸张。	1	2	21	1	2	1
WB-00858	关于【知识付费是否值得】这件事，大家关注点好像越来越偏了。	1	2	24	3	3	1
WB-00859	【短视频平台的流量机制】又上热搜了，看评论区真的什么声音都有。	1	1	14	2	3	4
WB-00860	这两天刷到不少关于【明星塌房后的舆论反转】的讨论，说实话还挺唏嘘的。	1	2	21	3	2	2
WB-00861	【明星塌房后的舆论反转】又上热搜了，看评论区真的什么声音都有。	1	3	32	3	2	2
WB-00862	不得不说，【年度爆款综艺】最近的讨论热度确实有点夸张。	1	2	21	3	2	4
WB-00863	【女性议题与舆论分化】又上热搜了，看评论区真的什么声音都有。	1	1	11	3	2	4
WB-00864	【年轻人就业与内卷】又上热搜了，看评论区真的什么声音都有。	1	1	11	3	1	2
WB-00865	【平台算法推荐问题】又上热搜了，看评论区真的什么声音都有。	1	2	24	1	1	4
WB-00866	不得不说，【年轻人就业与内卷】最近的讨论热度确实有点夸张。	1	3	32	3	2	4
WB-00867	这两天刷到不少关于【网络暴力与理性讨论】的讨论，说实话还挺唏嘘的。	1	3	32	3	3	4
WB-00868	关于【知识付费是否值得】这件事，大家关注点好像越来越偏了。	1	3	33	2	3	4
WB-00869	不得不说，【影视改编争议】最近的讨论热度确实有点夸张。	1	1	12	1	3	3
WB-00870	不得不说，【AI写作与创作者焦虑】最近的讨论热度确实有点夸张。	1	1	14	1	2	2
WB-00871	不得不说，【短视频平台的流量机制】最近的讨论热度确实有点夸张。	1	2	23	1	2	4
WB-00872	这两天刷到不少关于【年度爆款综艺】的讨论，说实话还挺唏嘘的。	1	1	14	3	2	4
WB-00873	这两天刷到不少关于【明星塌房后的舆论反转】的讨论，说实话还挺唏嘘的。	1	1	13	2	3	4
WB-00874	关于【网红带货翻车事件】这件事，大家关注点好像越来越偏了。	1	1	11	4	2	4
WB-00875	【影视改编争议】又上热搜了，看评论区真的什么声音都有。	1	3	33	1	1	3
WB-00876	这两天刷到不少关于【影视改编争议】的讨论，说实话还挺唏嘘的。	1	3	33	1	3	2
WB-00877	不得不说，【网络暴力与理性讨论】最近的讨论热度确实有点夸张。	1	3	32	4	3	3
WB-00878	这两天刷到不少关于【知识付费是否值得】的讨论，说实话还挺唏嘘的。	1	3	31	2	1	2
WB-00879	关于【女性议题与舆论分化】这件事，大家关注点好像越来越偏了。	1	2	21	4	3	4
WB-00880	关于【情绪价值消费】这件事，大家关注点好像越来越偏了。	1	2	22	3	3	1
WB-00881	关于【国产剧质量讨论】这件事，大家关注点好像越来越偏了。	1	2	21	1	1	4
WB-00882	不得不说，【网络暴力与理性讨论】最近的讨论热度确实有点夸张。	1	1	11	1	1	1
WB-00883	不得不说，【网络暴力与理性讨论】最近的讨论热度确实有点夸张。	1	1	12	4	1	4
WB-00884	关于【影视改编争议】这件事，大家关注点好像越来越偏了。	1	3	32	3	1	2
WB-00885	关于【短视频平台的流量机制】这件事，大家关注点好像越来越偏了。	1	3	32	1	3	4
WB-00886	这两天刷到不少关于【读书博主推荐争议】的讨论，说实话还挺唏嘘的。	1	2	21	4	3	4
WB-00887	不得不说，【网红带货翻车事件】最近的讨论热度确实有点夸张。	1	1	12	3	1	1
WB-00888	这两天刷到不少关于【国产剧质量讨论】的讨论，说实话还挺唏嘘的。	1	2	23	4	3	1
WB-00889	关于【读书博主推荐争议】这件事，大家关注点好像越来越偏了。	1	1	11	1	3	4
WB-00890	这两天刷到不少关于【女性议题与舆论分化】的讨论，说实话还挺唏嘘的。	1	2	24	1	2	2
WB-00891	不得不说，【网红带货翻车事件】最近的讨论热度确实有点夸张。	1	2	22	1	3	3
WB-00892	关于【平台算法推荐问题】这件事，大家关注点好像越来越偏了。	1	1	13	3	1	4
WB-00893	不得不说，【短视频平台的流量机制】最近的讨论热度确实有点夸张。	1	3	33	3	1	1
WB-00894	不得不说，【国产剧质量讨论】最近的讨论热度确实有点夸张。	1	3	33	3	2	3
WB-00895	这两天刷到不少关于【网红带货翻车事件】的讨论，说实话还挺唏嘘的。	1	3	33	2	1	2
WB-00896	【网红带货翻车事件】又上热搜了，看评论区真的什么声音都有。	1	1	12	4	1	1
WB-00897	这两天刷到不少关于【公共事件中的信息透明度】的讨论，说实话还挺唏嘘的。	1	1	14	2	3	2
WB-00898	这两天刷到不少关于【知识付费是否值得】的讨论，说实话还挺唏嘘的。	1	3	31	2	2	2
WB-00899	不得不说，【影视改编争议】最近的讨论热度确实有点夸张。	1	1	12	1	3	3
WB-00900	【公共事件中的信息透明度】又上热搜了，看评论区真的什么声音都有。	1	3	32	4	2	3
WB-00901	不得不说，【明星塌房后的舆论反转】最近的讨论热度确实有点夸张。	1	3	31	3	1	1
WB-00902	【影视改编争议】又上热搜了，看评论区真的什么声音都有。	1	1	11	3	2	4
WB-00903	不得不说，【读书博主推荐争议】最近的讨论热度确实有点夸张。	1	2	23	3	2	2
WB-00904	这两天刷到不少关于【年度爆款综艺】的讨论，说实话还挺唏嘘的。	1	1	11	3	2	4
WB-00905	这两天刷到不少关于【网络暴力与理性讨论】的讨论，说实话还挺唏嘘的。	1	3	31	1	2	1
WB-00906	这两天刷到不少关于【国产剧质量讨论】的讨论，说实话还挺唏嘘的。	1	2	24	2	1	2
WB-00907	这两天刷到不少关于【网红带货翻车事件】的讨论，说实话还挺唏嘘的。	1	3	32	4	3	1
WB-00908	不得不说，【网红带货翻车事件】最近的讨论热度确实有点夸张。	1	1	12	1	3	4
WB-00909	关于【女性议题与舆论分化】这件事，大家关注点好像越来越偏了。	1	3	33	4	1	1
WB-00910	不得不说，【网红带货翻车事件】最近的讨论热度确实有点夸张。	1	3	31	1	2	3
WB-00911	关于【国产剧质量讨论】这件事，大家关注点好像越来越偏了。	1	1	13	3	1	1
WB-00912	这两天刷到不少关于【明星塌房后的舆论反转】的讨论，说实话还挺唏嘘的。	1	1	11	3	2	4
WB-00913	这两天刷到不少关于【明星塌房后的舆论反转】的讨论，说实话还挺唏嘘的。	1	1	12	3	3	3
WB-00914	【年轻人就业与内卷】又上热搜了，看评论区真的什么声音都有。	1	2	24	3	2	2
WB-00915	关于【AI写作与创作者焦虑】这件事，大家关注点好像越来越偏了。	1	2	24	4	3	4
WB-00916	【短视频平台的流量机制】又上热搜了，看评论区真的什么声音都有。	1	1	12	1	1	4
WB-00917	【短视频平台的流量机制】又上热搜了，看评论区真的什么声音都有。	1	2	21	3	1	4
WB-00918	关于【知识付费是否值得】这件事，大家关注点好像越来越偏了。	1	1	14	2	2	4
WB-00919	关于【影视改编争议】这件事，大家关注点好像越来越偏了。	1	2	24	2	1	2
WB-00920	不得不说，【短视频平台的流量机制】最近的讨论热度确实有点夸张。	1	1	13	1	3	2
WB-00921	不得不说，【年轻人就业与内卷】最近的讨论热度确实有点夸张。	1	3	31	1	2	2
WB-00922	这两天刷到不少关于【女性议题与舆论分化】的讨论，说实话还挺唏嘘的。	1	1	14	2	3	1
WB-00923	不得不说，【城市生活成本上升】最近的讨论热度确实有点夸张。	1	3	31	1	1	2
WB-00924	这两天刷到不少关于【年度爆款综艺】的讨论，说实话还挺唏嘘的。	1	2	22	3	3	3
WB-00925	关于【知识付费是否值得】这件事，大家关注点好像越来越偏了。	1	3	32	4	2	3
WB-00926	【AI写作与创作者焦虑】又上热搜了，看评论区真的什么声音都有。	1	2	23	1	3	4
WB-00927	关于【女性议题与舆论分化】这件事，大家关注点好像越来越偏了。	1	2	23	1	2	1
WB-00928	【年轻人就业与内卷】又上热搜了，看评论区真的什么声音都有。	1	1	12	1	1	3
WB-00929	这两天刷到不少关于【女性议题与舆论分化】的讨论，说实话还挺唏嘘的。	1	3	32	2	3	1
WB-00930	关于【网红带货翻车事件】这件事，大家关注点好像越来越偏了。	1	1	11	1	1	4
WB-00931	【公共事件中的信息透明度】又上热搜了，看评论区真的什么声音都有。	1	1	12	1	2	2
WB-00932	这两天刷到不少关于【年轻人就业与内卷】的讨论，说实话还挺唏嘘的。	1	3	32	3	2	3
WB-00933	不得不说，【短视频平台的流量机制】最近的讨论热度确实有点夸张。	1	3	32	2	3	1
WB-00934	这两天刷到不少关于【女性议题与舆论分化】的讨论，说实话还挺唏嘘的。	1	1	13	2	3	2
WB-00935	这两天刷到不少关于【知识付费是否值得】的讨论，说实话还挺唏嘘的。	1	1	11	2	3	2
WB-00936	关于【影视改编争议】这件事，大家关注点好像越来越偏了。	1	2	22	2	1	4
WB-00937	关于【明星塌房后的舆论反转】这件事，大家关注点好像越来越偏了。	1	2	23	3	2	4
WB-00938	这两天刷到不少关于【女性议题与舆论分化】的讨论，说实话还挺唏嘘的。	1	2	21	3	1	3
WB-00939	关于【年度爆款综艺】这件事，大家关注点好像越来越偏了。	1	1	12	2	2	3
WB-00940	【短视频平台的流量机制】又上热搜了，看评论区真的什么声音都有。	1	3	32	4	1	2
WB-00941	这两天刷到不少关于【国产剧质量讨论】的讨论，说实话还挺唏嘘的。	1	3	32	2	1	1
WB-00942	这两天刷到不少关于【年度爆款综艺】的讨论，说实话还挺唏嘘的。	1	1	13	3	1	4
WB-00943	这两天刷到不少关于【城市生活成本上升】的讨论，说实话还挺唏嘘的。	1	1	13	4	1	3
WB-00944	不得不说，【公共事件中的信息透明度】最近的讨论热度确实有点夸张。	1	1	11	3	3	4
WB-00945	不得不说，【影视改编争议】最近的讨论热度确实有点夸张。	1	3	32	1	2	2
WB-00946	【年轻人就业与内卷】又上热搜了，看评论区真的什么声音都有。	1	3	31	4	2	2
WB-00947	不得不说，【女性议题与舆论分化】最近的讨论热度确实有点夸张。	1	3	31	2	1	4
WB-00948	关于【影视改编争议】这件事，大家关注点好像越来越偏了。	1	2	24	4	3	1
WB-00949	不得不说，【网红带货翻车事件】最近的讨论热度确实有点夸张。	1	1	11	2	2	2
WB-00950	这两天刷到不少关于【网络暴力与理性讨论】的讨论，说实话还挺唏嘘的。	1	1	14	1	3	4
WB-00951	关于【年轻人就业与内卷】这件事，大家关注点好像越来越偏了。	1	2	21	4	1	2
WB-00952	这两天刷到不少关于【公共事件中的信息透明度】的讨论，说实话还挺唏嘘的。	1	2	22	4	3	1
WB-00953	不得不说，【城市生活成本上升】最近的讨论热度确实有点夸张。	1	1	12	2	3	2
WB-00954	这两天刷到不少关于【影视改编争议】的讨论，说实话还挺唏嘘的。	1	1	13	4	2	4
WB-00955	这两天刷到不少关于【情绪价值消费】的讨论，说实话还挺唏嘘的。	1	2	21	1	3	1
WB-00956	这两天刷到不少关于【读书博主推荐争议】的讨论，说实话还挺唏嘘的。	1	2	24	3	1	1
WB-00957	【知识付费是否值得】又上热搜了，看评论区真的什么声音都有。	1	2	24	4	1	1
WB-00958	不得不说，【国产剧质量讨论】最近的讨论热度确实有点夸张。	1	1	12	2	2	1
WB-00959	关于【国产剧质量讨论】这件事，大家关注点好像越来越偏了。	1	3	31	1	2	4
WB-00960	这两天刷到不少关于【公共事件中的信息透明度】的讨论，说实话还挺唏嘘的。	1	2	22	2	1	3
WB-00961	关于【读书博主推荐争议】这件事，大家关注点好像越来越偏了。	1	1	11	1	1	3
WB-00962	不得不说，【影视改编争议】最近的讨论热度确实有点夸张。	1	1	11	4	2	4
WB-00963	不得不说，【短视频平台的流量机制】最近的讨论热度确实有点夸张。	1	1	11	3	1	1
WB-00964	不得不说，【影视改编争议】最近的讨论热度确实有点夸张。	1	2	21	1	1	4
WB-00965	【平台算法推荐问题】又上热搜了，看评论区真的什么声音都有。	1	1	14	4	3	3
WB-00966	【明星塌房后的舆论反转】又上热搜了，看评论区真的什么声音都有。	1	1	13	1	3	4
WB-00967	这两天刷到不少关于【明星塌房后的舆论反转】的讨论，说实话还挺唏嘘的。	1	3	31	3	1	3
WB-00968	这两天刷到不少关于【读书博主推荐争议】的讨论，说实话还挺唏嘘的。	1	3	33	2	2	4
WB-00969	【网红带货翻车事件】又上热搜了，看评论区真的什么声音都有。	1	3	33	1	3	2
WB-00970	关于【年轻人就业与内卷】这件事，大家关注点好像越来越偏了。	1	1	13	2	3	1
WB-00971	不得不说，【知识付费是否值得】最近的讨论热度确实有点夸张。	1	2	22	2	1	3
WB-00972	这两天刷到不少关于【短视频平台的流量机制】的讨论，说实话还挺唏嘘的。	1	1	13	1	2	2
WB-00973	不得不说，【读书博主推荐争议】最近的讨论热度确实有点夸张。	1	3	32	3	1	3
WB-00974	关于【国产剧质量讨论】这件事，大家关注点好像越来越偏了。	1	3	31	1	3	2
WB-00975	不得不说，【网红带货翻车事件】最近的讨论热度确实有点夸张。	1	1	11	3	1	1
WB-00976	关于【公共事件中的信息透明度】这件事，大家关注点好像越来越偏了。	1	1	13	4	2	4
WB-00977	【年轻人就业与内卷】又上热搜了，看评论区真的什么声音都有。	1	2	24	3	1	3
WB-00978	【国产剧质量讨论】又上热搜了，看评论区真的什么声音都有。	1	2	23	4	1	2
WB-00979	关于【短视频平台的流量机制】这件事，大家关注点好像越来越偏了。	1	1	12	1	2	2
WB-00980	这两天刷到不少关于【知识付费是否值得】的讨论，说实话还挺唏嘘的。	1	3	31	4	2	1
WB-00981	不得不说，【知识付费是否值得】最近的讨论热度确实有点夸张。	1	3	31	3	3	3
WB-00982	【情绪价值消费】又上热搜了，看评论区真的什么声音都有。	1	3	32	2	1	1
WB-00983	关于【知识付费是否值得】这件事，大家关注点好像越来越偏了。	1	1	12	3	1	1
WB-00984	【知识付费是否值得】又上热搜了，看评论区真的什么声音都有。	1	3	31	4	1	2
WB-00985	不得不说，【网络暴力与理性讨论】最近的讨论热度确实有点夸张。	1	1	12	1	3	3
WB-00986	关于【年度爆款综艺】这件事，大家关注点好像越来越偏了。	1	1	11	1	2	4
WB-00987	不得不说，【AI写作与创作者焦虑】最近的讨论热度确实有点夸张。	1	1	14	2	3	2
WB-00988	不得不说，【女性议题与舆论分化】最近的讨论热度确实有点夸张。	1	1	13	1	1	1
WB-00989	这两天刷到不少关于【影视改编争议】的讨论，说实话还挺唏嘘的。	1	1	13	3	3	3
WB-00990	关于【AI写作与创作者焦虑】这件事，大家关注点好像越来越偏了。	1	1	11	2	1	4
WB-00991	不得不说，【影视改编争议】最近的讨论热度确实有点夸张。	1	2	22	1	1	2
WB-00992	关于【网红带货翻车事件】这件事，大家关注点好像越来越偏了。	1	1	11	4	2	3
WB-00993	这两天刷到不少关于【影视改编争议】的讨论，说实话还挺唏嘘的。	1	3	32	4	2	3
WB-00994	【公共事件中的信息透明度】又上热搜了，看评论区真的什么声音都有。	1	3	33	3	3	4
WB-00995	关于【知识付费是否值得】这件事，大家关注点好像越来越偏了。	1	3	33	3	3	1
WB-00996	这两天刷到不少关于【网红带货翻车事件】的讨论，说实话还挺唏嘘的。	1	3	32	1	2	4
WB-00997	【AI写作与创作者焦虑】又上热搜了，看评论区真的什么声音都有。	1	2	24	1	3	4
WB-00998	【年轻人就业与内卷】又上热搜了，看评论区真的什么声音都有。	1	2	22	2	1	1
WB-00999	这两天刷到不少关于【知识付费是否值得】的讨论，说实话还挺唏嘘的。	1	1	14	4	2	4
WB-01000	不得不说，【影视改编争议】最近的讨论热度确实有点夸张。	1	2	21	3	3	2
WB-01001	这两天刷到不少关于【短视频平台的流量机制】的讨论，说实话还挺唏嘘的。	1	3	31	2	3	1
WB-01002	这两天刷到不少关于【短视频平台的流量机制】的讨论，说实话还挺唏嘘的。	1	3	31	4	2	1
WB-01003	这两天刷到不少关于【网红带货翻车事件】的讨论，说实话还挺唏嘘的。	1	3	33	3	2	4
WB-01004	【情绪价值消费】又上热搜了，看评论区真的什么声音都有。	1	3	31	4	2	2
WB-01005	关于【年度爆款综艺】这件事，大家关注点好像越来越偏了。	1	2	22	1	1	3
WB-01006	关于【AI写作与创作者焦虑】这件事，大家关注点好像越来越偏了。	1	3	33	2	1	2
WB-01007	不得不说，【年度爆款综艺】最近的讨论热度确实有点夸张。	1	2	22	3	3	1
WB-01008	这两天刷到不少关于【年轻人就业与内卷】的讨论，说实话还挺唏嘘的。	1	1	13	2	3	2
WB-01009	关于【明星塌房后的舆论反转】这件事，大家关注点好像越来越偏了。	1	2	24	2	2	4
WB-01010	不得不说，【年轻人就业与内卷】最近的讨论热度确实有点夸张。	1	2	22	2	1	3
WB-01011	这两天刷到不少关于【国产剧质量讨论】的讨论，说实话还挺唏嘘的。	1	3	31	3	2	2
WB-01012	不得不说，【情绪价值消费】最近的讨论热度确实有点夸张。	1	1	14	2	1	4
WB-01013	【年轻人就业与内卷】又上热搜了，看评论区真的什么声音都有。	1	1	13	4	2	2
WB-01014	这两天刷到不少关于【年轻人就业与内卷】的讨论，说实话还挺唏嘘的。	1	2	22	1	2	2
WB-01015	这两天刷到不少关于【公共事件中的信息透明度】的讨论，说实话还挺唏嘘的。	1	2	21	1	3	4
WB-01016	不得不说，【平台算法推荐问题】最近的讨论热度确实有点夸张。	1	3	31	3	2	4
WB-01017	这两天刷到不少关于【年度爆款综艺】的讨论，说实话还挺唏嘘的。	1	1	11	2	2	3
WB-01018	关于【影视改编争议】这件事，大家关注点好像越来越偏了。	1	3	31	1	2	1
WB-01019	这两天刷到不少关于【平台算法推荐问题】的讨论，说实话还挺唏嘘的。	1	2	22	3	3	1
WB-01020	关于【短视频平台的流量机制】这件事，大家关注点好像越来越偏了。	1	3	33	1	2	4
WB-01021	这两天刷到不少关于【平台算法推荐问题】的讨论，说实话还挺唏嘘的。	1	2	23	2	2	4
WB-01022	【网络暴力与理性讨论】又上热搜了，看评论区真的什么声音都有。	1	3	31	2	3	1
WB-01023	【年轻人就业与内卷】又上热搜了，看评论区真的什么声音都有。	1	1	14	3	1	2
WB-01024	不得不说，【平台算法推荐问题】最近的讨论热度确实有点夸张。	1	2	23	4	3	4
WB-01025	关于【影视改编争议】这件事，大家关注点好像越来越偏了。	1	1	14	1	3	3
WB-01026	不得不说，【AI写作与创作者焦虑】最近的讨论热度确实有点夸张。	1	1	13	1	1	1
WB-01027	这两天刷到不少关于【女性议题与舆论分化】的讨论，说实话还挺唏嘘的。	1	1	14	4	3	1
WB-01028	关于【年轻人就业与内卷】这件事，大家关注点好像越来越偏了。	1	3	32	1	3	2
WB-01029	关于【短视频平台的流量机制】这件事，大家关注点好像越来越偏了。	1	1	14	3	3	4
WB-01030	不得不说，【网红带货翻车事件】最近的讨论热度确实有点夸张。	1	1	11	1	2	1
WB-01031	【知识付费是否值得】又上热搜了，看评论区真的什么声音都有。	1	1	11	3	2	1
WB-01032	关于【AI写作与创作者焦虑】这件事，大家关注点好像越来越偏了。	1	1	11	4	3	3
WB-01033	【AI写作与创作者焦虑】又上热搜了，看评论区真的什么声音都有。	1	2	21	4	1	4
WB-01034	关于【读书博主推荐争议】这件事，大家关注点好像越来越偏了。	1	2	22	2	3	1
WB-01035	不得不说，【年度爆款综艺】最近的讨论热度确实有点夸张。	1	2	22	3	2	2
WB-01036	这两天刷到不少关于【影视改编争议】的讨论，说实话还挺唏嘘的。	1	1	12	1	1	3
WB-01037	不得不说，【年度爆款综艺】最近的讨论热度确实有点夸张。	1	1	13	2	2	2
WB-01038	【国产剧质量讨论】又上热搜了，看评论区真的什么声音都有。	1	3	31	1	3	1
WB-01039	【短视频平台的流量机制】又上热搜了，看评论区真的什么声音都有。	1	1	13	1	2	2
WB-01040	这两天刷到不少关于【女性议题与舆论分化】的讨论，说实话还挺唏嘘的。	1	2	22	4	2	2
WB-01041	关于【年度爆款综艺】这件事，大家关注点好像越来越偏了。	1	2	23	4	1	3
WB-01042	关于【公共事件中的信息透明度】这件事，大家关注点好像越来越偏了。	1	3	33	4	1	4
WB-01043	关于【城市生活成本上升】这件事，大家关注点好像越来越偏了。	1	3	33	3	1	4
WB-01044	不得不说，【年轻人就业与内卷】最近的讨论热度确实有点夸张。	1	2	22	4	2	1
WB-01045	关于【影视改编争议】这件事，大家关注点好像越来越偏了。	1	1	11	2	1	4
WB-01046	这两天刷到不少关于【知识付费是否值得】的讨论，说实话还挺唏嘘的。	1	3	31	1	2	4
WB-01047	关于【公共事件中的信息透明度】这件事，大家关注点好像越来越偏了。	1	3	32	1	2	3
WB-01048	【知识付费是否值得】又上热搜了，看评论区真的什么声音都有。	1	1	14	4	2	1
WB-01049	【女性议题与舆论分化】又上热搜了，看评论区真的什么声音都有。	1	3	31	1	1	3
WB-01050	【短视频平台的流量机制】又上热搜了，看评论区真的什么声音都有。	1	3	33	2	1	2
WB-01051	不得不说，【年轻人就业与内卷】最近的讨论热度确实有点夸张。	1	2	22	2	1	2
WB-01052	【情绪价值消费】又上热搜了，看评论区真的什么声音都有。	1	2	22	3	1	4
WB-01053	这两天刷到不少关于【年轻人就业与内卷】的讨论，说实话还挺唏嘘的。	1	3	31	4	2	2
WB-01054	这两天刷到不少关于【女性议题与舆论分化】的讨论，说实话还挺唏嘘的。	1	2	24	4	3	4
WB-01055	不得不说，【国产剧质量讨论】最近的讨论热度确实有点夸张。	1	3	32	2	3	2
WB-01056	这两天刷到不少关于【明星塌房后的舆论反转】的讨论，说实话还挺唏嘘的。	1	1	14	4	3	4
WB-01057	关于【城市生活成本上升】这件事，大家关注点好像越来越偏了。	1	1	11	1	1	2
WB-01058	关于【城市生活成本上升】这件事，大家关注点好像越来越偏了。	1	1	12	2	2	1
WB-01059	【平台算法推荐问题】又上热搜了，看评论区真的什么声音都有。	1	3	33	3	3	3
WB-01060	关于【网红带货翻车事件】这件事，大家关注点好像越来越偏了。	1	2	24	4	2	1
WB-01061	【知识付费是否值得】又上热搜了，看评论区真的什么声音都有。	1	2	22	4	3	4
WB-01062	不得不说，【网络暴力与理性讨论】最近的讨论热度确实有点夸张。	1	3	33	1	1	3
WB-01063	不得不说，【影视改编争议】最近的讨论热度确实有点夸张。	1	2	21	4	1	1
WB-01064	不得不说，【网络暴力与理性讨论】最近的讨论热度确实有点夸张。	1	2	23	2	3	2
WB-01065	这两天刷到不少关于【年轻人就业与内卷】的讨论，说实话还挺唏嘘的。	1	3	31	4	2	1
WB-01066	这两天刷到不少关于【AI写作与创作者焦虑】的讨论，说实话还挺唏嘘的。	1	1	12	3	2	2
WB-01067	不得不说，【知识付费是否值得】最近的讨论热度确实有点夸张。	1	3	31	2	2	3
WB-01068	不得不说，【短视频平台的流量机制】最近的讨论热度确实有点夸张。	1	3	32	3	1	1
WB-01069	关于【网络暴力与理性讨论】这件事，大家关注点好像越来越偏了。	1	1	13	1	3	1
WB-01070	关于【情绪价值消费】这件事，大家关注点好像越来越偏了。	1	2	21	3	2	1
WB-01071	【读书博主推荐争议】又上热搜了，看评论区真的什么声音都有。	1	2	23	3	2	2
WB-01072	关于【女性议题与舆论分化】这件事，大家关注点好像越来越偏了。	1	3	32	1	1	3
WB-01073	关于【平台算法推荐问题】这件事，大家关注点好像越来越偏了。	1	1	11	1	1	1
WB-01074	不得不说，【影视改编争议】最近的讨论热度确实有点夸张。	1	1	13	2	2	2
WB-01075	关于【明星塌房后的舆论反转】这件事，大家关注点好像越来越偏了。	1	2	22	2	1	1
WB-01076	这两天刷到不少关于【AI写作与创作者焦虑】的讨论，说实话还挺唏嘘的。	1	2	22	2	1	1
WB-01077	【公共事件中的信息透明度】又上热搜了，看评论区真的什么声音都有。	1	3	31	4	1	3
WB-01078	这两天刷到不少关于【网络暴力与理性讨论】的讨论，说实话还挺唏嘘的。	1	2	24	2	3	1
WB-01079	不得不说，【城市生活成本上升】最近的讨论热度确实有点夸张。	1	1	13	2	2	3
WB-01080	不得不说，【影视改编争议】最近的讨论热度确实有点夸张。	1	2	23	1	3	3
WB-01081	关于【女性议题与舆论分化】这件事，大家关注点好像越来越偏了。	1	1	13	4	3	3
WB-01082	这两天刷到不少关于【明星塌房后的舆论反转】的讨论，说实话还挺唏嘘的。	1	3	32	1	1	2
WB-01083	关于【公共事件中的信息透明度】这件事，大家关注点好像越来越偏了。	1	1	11	1	2	4
WB-01084	【国产剧质量讨论】又上热搜了，看评论区真的什么声音都有。	1	1	12	3	2	4
WB-01085	不得不说，【影视改编争议】最近的讨论热度确实有点夸张。	1	1	14	1	2	2
WB-01086	【平台算法推荐问题】又上热搜了，看评论区真的什么声音都有。	1	3	33	3	2	4
WB-01087	关于【短视频平台的流量机制】这件事，大家关注点好像越来越偏了。	1	2	24	4	3	3
WB-01088	关于【短视频平台的流量机制】这件事，大家关注点好像越来越偏了。	1	3	33	4	1	4
WB-01089	关于【城市生活成本上升】这件事，大家关注点好像越来越偏了。	1	2	24	2	1	2
WB-01090	不得不说，【知识付费是否值得】最近的讨论热度确实有点夸张。	1	1	11	1	3	4
WB-01091	这两天刷到不少关于【网红带货翻车事件】的讨论，说实话还挺唏嘘的。	1	3	32	3	1	1
WB-01092	不得不说，【女性议题与舆论分化】最近的讨论热度确实有点夸张。	1	2	23	1	2	4
WB-01093	【网络暴力与理性讨论】又上热搜了，看评论区真的什么声音都有。	1	3	32	2	2	2
WB-01094	不得不说，【网红带货翻车事件】最近的讨论热度确实有点夸张。	1	1	12	4	3	3
WB-01095	关于【年度爆款综艺】这件事，大家关注点好像越来越偏了。	1	1	12	4	3	4
WB-01096	关于【影视改编争议】这件事，大家关注点好像越来越偏了。	1	2	22	3	1	2
WB-01097	不得不说，【女性议题与舆论分化】最近的讨论热度确实有点夸张。	1	1	11	4	2	3
WB-01098	【年轻人就业与内卷】又上热搜了，看评论区真的什么声音都有。	1	2	23	3	3	2
WB-01099	关于【女性议题与舆论分化】这件事，大家关注点好像越来越偏了。	1	1	13	4	1	2
WB-01100	关于【国产剧质量讨论】这件事，大家关注点好像越来越偏了。	1	1	11	4	3	2
WB-01101	关于【国产剧质量讨论】这件事，大家关注点好像越来越偏了。	1	1	13	2	2	4
WB-01102	【年轻人就业与内卷】又上热搜了，看评论区真的什么声音都有。	1	1	13	3	1	3
WB-01103	不得不说，【短视频平台的流量机制】最近的讨论热度确实有点夸张。	1	3	32	4	1	2
WB-01104	这两天刷到不少关于【女性议题与舆论分化】的讨论，说实话还挺唏嘘的。	1	3	31	4	3	1
WB-01105	关于【网红带货翻车事件】这件事，大家关注点好像越来越偏了。	1	3	31	2	3	3
WB-01106	不得不说，【AI写作与创作者焦虑】最近的讨论热度确实有点夸张。	1	3	31	1	2	1
WB-01107	【网络暴力与理性讨论】又上热搜了，看评论区真的什么声音都有。	1	1	14	2	3	3
WB-01108	不得不说，【公共事件中的信息透明度】最近的讨论热度确实有点夸张。	1	1	12	4	1	4
WB-01109	不得不说，【年度爆款综艺】最近的讨论热度确实有点夸张。	1	1	14	2	2	2
WB-01110	关于【国产剧质量讨论】这件事，大家关注点好像越来越偏了。	1	2	22	1	2	1
WB-01111	不得不说，【明星塌房后的舆论反转】最近的讨论热度确实有点夸张。	1	3	33	1	3	4
WB-01112	不得不说，【网络暴力与理性讨论】最近的讨论热度确实有点夸张。	1	3	31	1	1	2
WB-01113	关于【城市生活成本上升】这件事，大家关注点好像越来越偏了。	1	2	24	3	3	2
WB-01114	这两天刷到不少关于【年轻人就业与内卷】的讨论，说实话还挺唏嘘的。	1	3	32	4	1	4
WB-01115	不得不说，【国产剧质量讨论】最近的讨论热度确实有点夸张。	1	3	33	4	3	1
WB-01116	【女性议题与舆论分化】又上热搜了，看评论区真的什么声音都有。	1	2	23	2	2	4
WB-01117	不得不说，【年轻人就业与内卷】最近的讨论热度确实有点夸张。	1	2	22	1	1	2
WB-01118	这两天刷到不少关于【影视改编争议】的讨论，说实话还挺唏嘘的。	1	2	24	1	2	4
WB-01119	这两天刷到不少关于【读书博主推荐争议】的讨论，说实话还挺唏嘘的。	1	2	23	4	1	4
WB-01120	这两天刷到不少关于【年度爆款综艺】的讨论，说实话还挺唏嘘的。	1	2	22	1	2	2
WB-01121	【网络暴力与理性讨论】又上热搜了，看评论区真的什么声音都有。	1	1	14	4	2	2
WB-01122	【年轻人就业与内卷】又上热搜了，看评论区真的什么声音都有。	1	3	32	2	2	1
WB-01123	关于【公共事件中的信息透明度】这件事，大家关注点好像越来越偏了。	1	3	32	4	3	4
WB-01124	关于【短视频平台的流量机制】这件事，大家关注点好像越来越偏了。	1	1	11	4	2	4
WB-01125	【知识付费是否值得】又上热搜了，看评论区真的什么声音都有。	1	2	24	3	3	2
WB-01126	关于【公共事件中的信息透明度】这件事，大家关注点好像越来越偏了。	1	1	12	1	2	1
WB-01127	不得不说，【网红带货翻车事件】最近的讨论热度确实有点夸张。	1	3	32	1	2	1
WB-01128	这两天刷到不少关于【情绪价值消费】的讨论，说实话还挺唏嘘的。	1	1	11	4	1	2
WB-01129	【明星塌房后的舆论反转】又上热搜了，看评论区真的什么声音都有。	1	1	14	4	1	3
WB-01130	关于【读书博主推荐争议】这件事，大家关注点好像越来越偏了。	1	3	32	3	3	4
WB-01131	不得不说，【情绪价值消费】最近的讨论热度确实有点夸张。	1	1	12	2	3	2
WB-01132	不得不说，【网络暴力与理性讨论】最近的讨论热度确实有点夸张。	1	2	22	4	3	3
WB-01133	关于【短视频平台的流量机制】这件事，大家关注点好像越来越偏了。	1	1	14	2	1	2
WB-01134	【影视改编争议】又上热搜了，看评论区真的什么声音都有。	1	2	22	2	1	4
WB-01135	关于【明星塌房后的舆论反转】这件事，大家关注点好像越来越偏了。	1	2	24	3	3	1
WB-01136	【女性议题与舆论分化】又上热搜了，看评论区真的什么声音都有。	1	3	33	4	1	3
WB-01137	关于【影视改编争议】这件事，大家关注点好像越来越偏了。	1	2	21	1	2	3
WB-01138	这两天刷到不少关于【影视改编争议】的讨论，说实话还挺唏嘘的。	1	2	22	2	3	1
WB-01139	不得不说，【明星塌房后的舆论反转】最近的讨论热度确实有点夸张。	1	1	12	4	3	4
WB-01140	这两天刷到不少关于【短视频平台的流量机制】的讨论，说实话还挺唏嘘的。	1	3	32	4	1	2
WB-01141	关于【读书博主推荐争议】这件事，大家关注点好像越来越偏了。	1	1	14	1	3	3
WB-01142	这两天刷到不少关于【平台算法推荐问题】的讨论，说实话还挺唏嘘的。	1	2	22	2	1	1
WB-01143	不得不说，【年轻人就业与内卷】最近的讨论热度确实有点夸张。	1	3	33	4	3	4
WB-01144	这两天刷到不少关于【情绪价值消费】的讨论，说实话还挺唏嘘的。	1	1	12	4	3	2
WB-01145	这两天刷到不少关于【网红带货翻车事件】的讨论，说实话还挺唏嘘的。	1	3	33	4	2	2
WB-01146	【网红带货翻车事件】又上热搜了，看评论区真的什么声音都有。	1	2	21	4	3	4
WB-01147	关于【影视改编争议】这件事，大家关注点好像越来越偏了。	1	2	21	3	2	3
WB-01148	【影视改编争议】又上热搜了，看评论区真的什么声音都有。	1	2	21	4	2	1
WB-01149	【公共事件中的信息透明度】又上热搜了，看评论区真的什么声音都有。	1	1	14	4	2	1
WB-01150	关于【国产剧质量讨论】这件事，大家关注点好像越来越偏了。	1	3	33	4	3	2
WB-01151	不得不说，【公共事件中的信息透明度】最近的讨论热度确实有点夸张。	1	1	13	3	2	3
WB-01152	【公共事件中的信息透明度】又上热搜了，看评论区真的什么声音都有。	1	2	22	1	2	4
WB-01153	【公共事件中的信息透明度】又上热搜了，看评论区真的什么声音都有。	1	2	23	2	1	3
WB-01154	不得不说，【年度爆款综艺】最近的讨论热度确实有点夸张。	1	1	12	2	3	2
WB-01155	关于【平台算法推荐问题】这件事，大家关注点好像越来越偏了。	1	2	24	2	3	1
WB-01156	关于【网络暴力与理性讨论】这件事，大家关注点好像越来越偏了。	1	3	31	4	1	3
WB-01157	【影视改编争议】又上热搜了，看评论区真的什么声音都有。	1	3	33	2	3	3
WB-01158	不得不说，【女性议题与舆论分化】最近的讨论热度确实有点夸张。	1	2	24	2	2	3
WB-01159	不得不说，【网红带货翻车事件】最近的讨论热度确实有点夸张。	1	1	12	3	3	1
WB-01160	这两天刷到不少关于【国产剧质量讨论】的讨论，说实话还挺唏嘘的。	1	2	21	3	3	3
WB-01161	这两天刷到不少关于【影视改编争议】的讨论，说实话还挺唏嘘的。	1	1	11	4	2	1
WB-01162	不得不说，【明星塌房后的舆论反转】最近的讨论热度确实有点夸张。	1	1	13	2	1	3
WB-01163	这两天刷到不少关于【情绪价值消费】的讨论，说实话还挺唏嘘的。	1	1	13	3	1	2
WB-01164	关于【短视频平台的流量机制】这件事，大家关注点好像越来越偏了。	1	3	32	3	1	3
WB-01165	不得不说，【年度爆款综艺】最近的讨论热度确实有点夸张。	1	3	32	2	1	1
WB-01166	关于【明星塌房后的舆论反转】这件事，大家关注点好像越来越偏了。	1	3	32	3	2	4
WB-01167	关于【知识付费是否值得】这件事，大家关注点好像越来越偏了。	1	3	31	1	2	4
WB-01168	【短视频平台的流量机制】又上热搜了，看评论区真的什么声音都有。	1	3	32	1	1	1
WB-01169	关于【网络暴力与理性讨论】这件事，大家关注点好像越来越偏了。	1	2	22	1	3	1
WB-01170	【女性议题与舆论分化】又上热搜了，看评论区真的什么声音都有。	1	2	23	1	3	4
WB-01171	不得不说，【平台算法推荐问题】最近的讨论热度确实有点夸张。	1	3	32	2	2	1
WB-01172	不得不说，【明星塌房后的舆论反转】最近的讨论热度确实有点夸张。	1	2	21	2	2	2
WB-01173	【影视改编争议】又上热搜了，看评论区真的什么声音都有。	1	1	12	1	2	1
WB-01174	这两天刷到不少关于【公共事件中的信息透明度】的讨论，说实话还挺唏嘘的。	1	3	32	1	2	4
WB-01175	关于【城市生活成本上升】这件事，大家关注点好像越来越偏了。	1	3	33	1	1	1
WB-01176	这两天刷到不少关于【知识付费是否值得】的讨论，说实话还挺唏嘘的。	1	1	14	2	2	4
WB-01177	【短视频平台的流量机制】又上热搜了，看评论区真的什么声音都有。	1	1	13	1	3	3
WB-01178	【影视改编争议】又上热搜了，看评论区真的什么声音都有。	1	2	21	4	3	3
WB-01179	【国产剧质量讨论】又上热搜了，看评论区真的什么声音都有。	1	2	23	1	2	1
WB-01180	【年度爆款综艺】又上热搜了，看评论区真的什么声音都有。	1	2	22	2	3	1
WB-01181	不得不说，【平台算法推荐问题】最近的讨论热度确实有点夸张。	1	2	24	1	2	4
WB-01182	关于【年度爆款综艺】这件事，大家关注点好像越来越偏了。	1	1	13	2	3	4
WB-01183	这两天刷到不少关于【年轻人就业与内卷】的讨论，说实话还挺唏嘘的。	1	1	13	4	3	1
WB-01184	【国产剧质量讨论】又上热搜了，看评论区真的什么声音都有。	1	1	11	2	2	1
WB-01185	不得不说，【短视频平台的流量机制】最近的讨论热度确实有点夸张。	1	1	14	2	3	4
WB-01186	【年度爆款综艺】又上热搜了，看评论区真的什么声音都有。	1	3	32	3	3	1
WB-01187	不得不说，【年度爆款综艺】最近的讨论热度确实有点夸张。	1	2	24	4	2	2
WB-01188	这两天刷到不少关于【读书博主推荐争议】的讨论，说实话还挺唏嘘的。	1	1	13	3	2	1
WB-01189	不得不说，【AI写作与创作者焦虑】最近的讨论热度确实有点夸张。	1	3	31	3	1	2
WB-01190	这两天刷到不少关于【AI写作与创作者焦虑】的讨论，说实话还挺唏嘘的。	1	2	24	4	1	3
WB-01191	关于【平台算法推荐问题】这件事，大家关注点好像越来越偏了。	1	2	21	1	1	4
WB-01192	关于【明星塌房后的舆论反转】这件事，大家关注点好像越来越偏了。	1	1	14	4	1	1
WB-01193	这两天刷到不少关于【年度爆款综艺】的讨论，说实话还挺唏嘘的。	1	1	13	1	2	2
WB-01194	这两天刷到不少关于【知识付费是否值得】的讨论，说实话还挺唏嘘的。	1	1	11	3	2	4
WB-01195	关于【城市生活成本上升】这件事，大家关注点好像越来越偏了。	1	2	22	3	3	3
WB-01196	不得不说，【读书博主推荐争议】最近的讨论热度确实有点夸张。	1	3	33	2	3	2
WB-01197	这两天刷到不少关于【年度爆款综艺】的讨论，说实话还挺唏嘘的。	1	2	22	2	2	1
WB-01198	不得不说，【网络暴力与理性讨论】最近的讨论热度确实有点夸张。	1	1	13	2	2	4
WB-01199	不得不说，【网络暴力与理性讨论】最近的讨论热度确实有点夸张。	1	2	22	3	3	2
WB-01200	关于【短视频平台的流量机制】这件事，大家关注点好像越来越偏了。	1	1	12	4	2	1
WB-01201	不得不说，【明星塌房后的舆论反转】最近的讨论热度确实有点夸张。	1	2	23	4	1	4
WB-01202	【网红带货翻车事件】又上热搜了，看评论区真的什么声音都有。	1	3	32	2	3	2
WB-01203	这两天刷到不少关于【知识付费是否值得】的讨论，说实话还挺唏嘘的。	1	2	21	4	2	1
WB-01204	这两天刷到不少关于【网红带货翻车事件】的讨论，说实话还挺唏嘘的。	1	1	11	1	3	2
WB-01205	这两天刷到不少关于【读书博主推荐争议】的讨论，说实话还挺唏嘘的。	1	1	11	3	3	2
WB-01206	这两天刷到不少关于【明星塌房后的舆论反转】的讨论，说实话还挺唏嘘的。	1	3	32	4	2	2
WB-01207	【情绪价值消费】又上热搜了，看评论区真的什么声音都有。	1	1	12	3	1	2
WB-01208	这两天刷到不少关于【影视改编争议】的讨论，说实话还挺唏嘘的。	1	2	24	4	1	2
WB-01209	不得不说，【情绪价值消费】最近的讨论热度确实有点夸张。	1	3	31	4	1	4
WB-01210	不得不说，【网红带货翻车事件】最近的讨论热度确实有点夸张。	1	1	12	4	2	4
WB-01211	关于【明星塌房后的舆论反转】这件事，大家关注点好像越来越偏了。	1	2	22	1	3	4
WB-01212	这两天刷到不少关于【平台算法推荐问题】的讨论，说实话还挺唏嘘的。	1	1	13	2	3	4
WB-01213	不得不说，【女性议题与舆论分化】最近的讨论热度确实有点夸张。	1	2	21	1	1	3
WB-01214	关于【公共事件中的信息透明度】这件事，大家关注点好像越来越偏了。	1	3	31	2	3	1
WB-01215	这两天刷到不少关于【影视改编争议】的讨论，说实话还挺唏嘘的。	1	3	33	4	1	1
WB-01216	不得不说，【网络暴力与理性讨论】最近的讨论热度确实有点夸张。	1	2	22	1	2	4
WB-01217	关于【AI写作与创作者焦虑】这件事，大家关注点好像越来越偏了。	1	1	14	3	3	3
WB-01218	不得不说，【网红带货翻车事件】最近的讨论热度确实有点夸张。	1	1	13	1	2	1
WB-01219	关于【知识付费是否值得】这件事，大家关注点好像越来越偏了。	1	1	13	2	3	4
WB-01220	这两天刷到不少关于【读书博主推荐争议】的讨论，说实话还挺唏嘘的。	1	1	13	1	3	1
WB-01221	不得不说，【网络暴力与理性讨论】最近的讨论热度确实有点夸张。	1	1	13	2	1	4
WB-01222	关于【AI写作与创作者焦虑】这件事，大家关注点好像越来越偏了。	1	3	33	2	3	3
WB-01223	这两天刷到不少关于【公共事件中的信息透明度】的讨论，说实话还挺唏嘘的。	1	2	23	3	3	2
WB-01224	不得不说，【国产剧质量讨论】最近的讨论热度确实有点夸张。	1	3	31	1	1	2
WB-01225	这两天刷到不少关于【AI写作与创作者焦虑】的讨论，说实话还挺唏嘘的。	1	3	31	4	3	2
WB-01226	这两天刷到不少关于【年轻人就业与内卷】的讨论，说实话还挺唏嘘的。	1	3	31	1	2	1
WB-01227	不得不说，【读书博主推荐争议】最近的讨论热度确实有点夸张。	1	3	33	1	1	3
WB-01228	【网红带货翻车事件】又上热搜了，看评论区真的什么声音都有。	1	2	21	4	3	2
WB-01229	这两天刷到不少关于【网红带货翻车事件】的讨论，说实话还挺唏嘘的。	1	2	24	1	2	4
WB-01230	这两天刷到不少关于【读书博主推荐争议】的讨论，说实话还挺唏嘘的。	1	1	12	2	1	2
WB-01231	不得不说，【网络暴力与理性讨论】最近的讨论热度确实有点夸张。	1	2	23	4	3	3
WB-01232	这两天刷到不少关于【城市生活成本上升】的讨论，说实话还挺唏嘘的。	1	2	24	2	1	3
WB-01233	关于【公共事件中的信息透明度】这件事，大家关注点好像越来越偏了。	1	3	31	2	1	2
WB-01234	这两天刷到不少关于【情绪价值消费】的讨论，说实话还挺唏嘘的。	1	3	31	2	1	1
WB-01235	关于【AI写作与创作者焦虑】这件事，大家关注点好像越来越偏了。	1	2	24	2	2	4
WB-01236	不得不说，【女性议题与舆论分化】最近的讨论热度确实有点夸张。	1	3	32	1	3	3
WB-01237	关于【影视改编争议】这件事，大家关注点好像越来越偏了。	1	3	33	4	3	4
WB-01238	关于【年度爆款综艺】这件事，大家关注点好像越来越偏了。	1	3	33	4	2	1
WB-01239	这两天刷到不少关于【影视改编争议】的讨论，说实话还挺唏嘘的。	1	2	24	4	3	3
WB-01240	这两天刷到不少关于【网红带货翻车事件】的讨论，说实话还挺唏嘘的。	1	2	24	4	2	1
WB-01241	这两天刷到不少关于【读书博主推荐争议】的讨论，说实话还挺唏嘘的。	1	3	32	1	2	3
WB-01242	不得不说，【年度爆款综艺】最近的讨论热度确实有点夸张。	1	3	31	3	2	4
WB-01243	这两天刷到不少关于【城市生活成本上升】的讨论，说实话还挺唏嘘的。	1	2	21	1	3	4
WB-01244	【AI写作与创作者焦虑】又上热搜了，看评论区真的什么声音都有。	1	3	33	3	3	1
WB-01245	这两天刷到不少关于【网红带货翻车事件】的讨论，说实话还挺唏嘘的。	1	1	12	1	2	1
WB-01246	【知识付费是否值得】又上热搜了，看评论区真的什么声音都有。	1	1	14	1	2	1
WB-01247	关于【城市生活成本上升】这件事，大家关注点好像越来越偏了。	1	3	32	1	1	4
WB-01248	不得不说，【明星塌房后的舆论反转】最近的讨论热度确实有点夸张。	1	2	21	3	1	1
WB-01249	关于【年度爆款综艺】这件事，大家关注点好像越来越偏了。	1	2	21	4	2	3
WB-01250	这两天刷到不少关于【短视频平台的流量机制】的讨论，说实话还挺唏嘘的。	1	2	23	2	1	4
WB-01251	【情绪价值消费】又上热搜了，看评论区真的什么声音都有。	1	1	12	2	3	1
WB-01252	【国产剧质量讨论】又上热搜了，看评论区真的什么声音都有。	1	3	32	4	3	1
WB-01253	关于【平台算法推荐问题】这件事，大家关注点好像越来越偏了。	1	1	13	2	1	2
WB-01254	【公共事件中的信息透明度】又上热搜了，看评论区真的什么声音都有。	1	2	22	2	3	3
WB-01255	不得不说，【影视改编争议】最近的讨论热度确实有点夸张。	1	3	31	1	3	3
WB-01256	不得不说，【城市生活成本上升】最近的讨论热度确实有点夸张。	1	1	11	4	2	1
WB-01257	【影视改编争议】又上热搜了，看评论区真的什么声音都有。	1	3	31	2	3	2
WB-01258	关于【明星塌房后的舆论反转】这件事，大家关注点好像越来越偏了。	1	1	14	1	3	3
WB-01259	不得不说，【公共事件中的信息透明度】最近的讨论热度确实有点夸张。	1	1	13	1	3	4
WB-01260	【年度爆款综艺】又上热搜了，看评论区真的什么声音都有。	1	1	11	4	1	3
WB-01261	【明星塌房后的舆论反转】又上热搜了，看评论区真的什么声音都有。	1	2	22	2	1	2
WB-01262	关于【平台算法推荐问题】这件事，大家关注点好像越来越偏了。	1	1	13	1	1	2
WB-01263	不得不说，【网红带货翻车事件】最近的讨论热度确实有点夸张。	1	1	13	1	1	2
WB-01264	【年度爆款综艺】又上热搜了，看评论区真的什么声音都有。	1	1	12	1	1	2
WB-01265	这两天刷到不少关于【年轻人就业与内卷】的讨论，说实话还挺唏嘘的。	1	2	23	1	3	1
WB-01266	不得不说，【城市生活成本上升】最近的讨论热度确实有点夸张。	1	1	11	3	2	4
WB-01267	【国产剧质量讨论】又上热搜了，看评论区真的什么声音都有。	1	1	14	3	2	4
WB-01268	这两天刷到不少关于【年轻人就业与内卷】的讨论，说实话还挺唏嘘的。	1	2	21	1	1	4
WB-01269	不得不说，【读书博主推荐争议】最近的讨论热度确实有点夸张。	1	3	31	4	1	2
WB-01270	不得不说，【读书博主推荐争议】最近的讨论热度确实有点夸张。	1	2	24	2	1	4
WB-01271	关于【年轻人就业与内卷】这件事，大家关注点好像越来越偏了。	1	1	11	2	1	2
WB-01272	关于【知识付费是否值得】这件事，大家关注点好像越来越偏了。	1	1	12	1	1	4
WB-01273	不得不说，【影视改编争议】最近的讨论热度确实有点夸张。	1	2	24	2	2	1
WB-01274	【情绪价值消费】又上热搜了，看评论区真的什么声音都有。	1	1	14	1	2	2
WB-01275	这两天刷到不少关于【情绪价值消费】的讨论，说实话还挺唏嘘的。	1	3	31	3	1	1
WB-01276	【网红带货翻车事件】又上热搜了，看评论区真的什么声音都有。	1	2	21	4	3	1
WB-01277	不得不说，【短视频平台的流量机制】最近的讨论热度确实有点夸张。	1	2	24	4	3	1
WB-01278	关于【短视频平台的流量机制】这件事，大家关注点好像越来越偏了。	1	2	23	1	2	3
WB-01279	关于【公共事件中的信息透明度】这件事，大家关注点好像越来越偏了。	1	1	12	3	3	4
WB-01280	不得不说，【影视改编争议】最近的讨论热度确实有点夸张。	1	1	12	3	2	2
WB-01281	关于【情绪价值消费】这件事，大家关注点好像越来越偏了。	1	3	32	1	3	4
WB-01282	【影视改编争议】又上热搜了，看评论区真的什么声音都有。	1	2	22	4	3	4
WB-01283	【情绪价值消费】又上热搜了，看评论区真的什么声音都有。	1	3	32	3	3	4
WB-01284	【网红带货翻车事件】又上热搜了，看评论区真的什么声音都有。	1	2	23	4	2	3
WB-01285	不得不说，【网红带货翻车事件】最近的讨论热度确实有点夸张。	1	1	14	3	1	2
WB-01286	关于【年度爆款综艺】这件事，大家关注点好像越来越偏了。	1	3	33	2	3	3
WB-01287	【AI写作与创作者焦虑】又上热搜了，看评论区真的什么声音都有。	1	3	33	4	1	4
WB-01288	关于【影视改编争议】这件事，大家关注点好像越来越偏了。	1	3	31	4	3	1
WB-01289	关于【平台算法推荐问题】这件事，大家关注点好像越来越偏了。	1	1	11	4	1	3
WB-01290	不得不说，【读书博主推荐争议】最近的讨论热度确实有点夸张。	1	1	11	2	2	1
WB-01291	不得不说，【读书博主推荐争议】最近的讨论热度确实有点夸张。	1	3	31	3	2	4
WB-01292	关于【AI写作与创作者焦虑】这件事，大家关注点好像越来越偏了。	1	1	12	3	2	4
WB-01293	这两天刷到不少关于【女性议题与舆论分化】的讨论，说实话还挺唏嘘的。	1	2	22	3	1	4
WB-01294	这两天刷到不少关于【网红带货翻车事件】的讨论，说实话还挺唏嘘的。	1	2	22	1	3	1
WB-01295	这两天刷到不少关于【读书博主推荐争议】的讨论，说实话还挺唏嘘的。	1	3	32	2	3	4
WB-01296	关于【明星塌房后的舆论反转】这件事，大家关注点好像越来越偏了。	1	3	33	2	1	1
WB-01297	关于【短视频平台的流量机制】这件事，大家关注点好像越来越偏了。	1	3	32	3	1	3
WB-01298	不得不说，【影视改编争议】最近的讨论热度确实有点夸张。	1	2	23	3	3	2
WB-01299	不得不说，【知识付费是否值得】最近的讨论热度确实有点夸张。	1	3	33	3	2	3
WB-01300	关于【明星塌房后的舆论反转】这件事，大家关注点好像越来越偏了。	1	1	11	2	3	4
WB-01301	【情绪价值消费】又上热搜了，看评论区真的什么声音都有。	1	1	13	2	2	4
WB-01302	不得不说，【网络暴力与理性讨论】最近的讨论热度确实有点夸张。	1	3	33	1	3	4
WB-01303	这两天刷到不少关于【读书博主推荐争议】的讨论，说实话还挺唏嘘的。	1	2	21	3	1	2
WB-01304	这两天刷到不少关于【网红带货翻车事件】的讨论，说实话还挺唏嘘的。	1	3	32	1	3	4
WB-01305	【网红带货翻车事件】又上热搜了，看评论区真的什么声音都有。	1	1	11	4	1	2
WB-01306	不得不说，【知识付费是否值得】最近的讨论热度确实有点夸张。	1	1	12	2	1	3
WB-01307	不得不说，【公共事件中的信息透明度】最近的讨论热度确实有点夸张。	1	3	31	3	2	2
WB-01308	【平台算法推荐问题】又上热搜了，看评论区真的什么声音都有。	1	3	32	3	1	2
WB-01309	这两天刷到不少关于【读书博主推荐争议】的讨论，说实话还挺唏嘘的。	1	1	14	4	2	3
WB-01310	【网红带货翻车事件】又上热搜了，看评论区真的什么声音都有。	1	2	21	4	2	4
WB-01311	这两天刷到不少关于【网络暴力与理性讨论】的讨论，说实话还挺唏嘘的。	1	1	11	3	3	4
WB-01312	关于【短视频平台的流量机制】这件事，大家关注点好像越来越偏了。	1	3	33	1	1	4
WB-01313	关于【网红带货翻车事件】这件事，大家关注点好像越来越偏了。	1	1	13	2	2	1
WB-01314	这两天刷到不少关于【网红带货翻车事件】的讨论，说实话还挺唏嘘的。	1	1	14	3	1	4
WB-01315	这两天刷到不少关于【短视频平台的流量机制】的讨论，说实话还挺唏嘘的。	1	2	22	1	3	4
WB-01316	不得不说，【网红带货翻车事件】最近的讨论热度确实有点夸张。	1	3	31	4	2	3
WB-01317	【国产剧质量讨论】又上热搜了，看评论区真的什么声音都有。	1	1	14	4	2	2
WB-01318	关于【城市生活成本上升】这件事，大家关注点好像越来越偏了。	1	1	11	1	1	4
WB-01319	这两天刷到不少关于【网红带货翻车事件】的讨论，说实话还挺唏嘘的。	1	2	22	3	1	3
WB-01320	不得不说，【网络暴力与理性讨论】最近的讨论热度确实有点夸张。	1	3	31	1	1	1
WB-01321	这两天刷到不少关于【年度爆款综艺】的讨论，说实话还挺唏嘘的。	1	2	21	4	1	3
WB-01322	这两天刷到不少关于【国产剧质量讨论】的讨论，说实话还挺唏嘘的。	1	3	33	2	1	3
WB-01323	不得不说，【平台算法推荐问题】最近的讨论热度确实有点夸张。	1	3	32	2	3	4
WB-01324	不得不说，【平台算法推荐问题】最近的讨论热度确实有点夸张。	1	1	13	2	3	2
WB-01325	【AI写作与创作者焦虑】又上热搜了，看评论区真的什么声音都有。	1	1	13	4	1	1
WB-01326	不得不说，【年轻人就业与内卷】最近的讨论热度确实有点夸张。	1	1	12	3	3	3
WB-01327	不得不说，【平台算法推荐问题】最近的讨论热度确实有点夸张。	1	1	14	4	2	4
WB-01328	关于【情绪价值消费】这件事，大家关注点好像越来越偏了。	1	3	32	1	2	4
WB-01329	不得不说，【公共事件中的信息透明度】最近的讨论热度确实有点夸张。	1	3	33	1	1	1
WB-01330	这两天刷到不少关于【读书博主推荐争议】的讨论，说实话还挺唏嘘的。	1	2	22	1	3	4
WB-01331	【明星塌房后的舆论反转】又上热搜了，看评论区真的什么声音都有。	1	2	21	4	3	2
WB-01332	这两天刷到不少关于【读书博主推荐争议】的讨论，说实话还挺唏嘘的。	1	3	32	2	2	4
WB-01333	不得不说，【国产剧质量讨论】最近的讨论热度确实有点夸张。	1	3	31	1	1	1
WB-01334	这两天刷到不少关于【平台算法推荐问题】的讨论，说实话还挺唏嘘的。	1	1	14	2	1	1
WB-01335	关于【情绪价值消费】这件事，大家关注点好像越来越偏了。	1	1	12	3	3	4
WB-01336	不得不说，【知识付费是否值得】最近的讨论热度确实有点夸张。	1	3	32	2	2	4
WB-01337	这两天刷到不少关于【AI写作与创作者焦虑】的讨论，说实话还挺唏嘘的。	1	3	31	1	2	3
WB-01338	关于【公共事件中的信息透明度】这件事，大家关注点好像越来越偏了。	1	2	21	2	1	4
WB-01339	这两天刷到不少关于【知识付费是否值得】的讨论，说实话还挺唏嘘的。	1	2	22	1	3	2
WB-01340	关于【情绪价值消费】这件事，大家关注点好像越来越偏了。	1	3	31	2	3	1
WB-01341	不得不说，【读书博主推荐争议】最近的讨论热度确实有点夸张。	1	2	24	1	2	3
WB-01342	这两天刷到不少关于【女性议题与舆论分化】的讨论，说实话还挺唏嘘的。	1	2	21	1	1	1
WB-01343	不得不说，【影视改编争议】最近的讨论热度确实有点夸张。	1	1	12	4	3	2
WB-01344	不得不说，【公共事件中的信息透明度】最近的讨论热度确实有点夸张。	1	3	32	2	3	2
WB-01345	关于【读书博主推荐争议】这件事，大家关注点好像越来越偏了。	1	3	31	1	2	4
WB-01346	不得不说，【国产剧质量讨论】最近的讨论热度确实有点夸张。	1	2	24	2	3	3
WB-01347	【影视改编争议】又上热搜了，看评论区真的什么声音都有。	1	3	31	4	3	2
WB-01348	不得不说，【年轻人就业与内卷】最近的讨论热度确实有点夸张。	1	2	23	2	1	1
WB-01349	【影视改编争议】又上热搜了，看评论区真的什么声音都有。	1	1	11	4	3	1
WB-01350	不得不说，【网络暴力与理性讨论】最近的讨论热度确实有点夸张。	1	3	32	4	1	3
WB-01351	这两天刷到不少关于【情绪价值消费】的讨论，说实话还挺唏嘘的。	1	3	32	4	3	2
WB-01352	不得不说，【网络暴力与理性讨论】最近的讨论热度确实有点夸张。	1	2	24	4	3	2
WB-01353	这两天刷到不少关于【影视改编争议】的讨论，说实话还挺唏嘘的。	1	3	31	4	3	3
WB-01354	【平台算法推荐问题】又上热搜了，看评论区真的什么声音都有。	1	1	12	4	3	3
WB-01355	这两天刷到不少关于【影视改编争议】的讨论，说实话还挺唏嘘的。	1	1	14	3	3	3
WB-01356	这两天刷到不少关于【公共事件中的信息透明度】的讨论，说实话还挺唏嘘的。	1	3	32	3	3	4
WB-01357	关于【城市生活成本上升】这件事，大家关注点好像越来越偏了。	1	2	21	3	3	2
WB-01358	这两天刷到不少关于【影视改编争议】的讨论，说实话还挺唏嘘的。	1	2	23	3	3	2
WB-01359	这两天刷到不少关于【情绪价值消费】的讨论，说实话还挺唏嘘的。	1	3	31	2	1	1
WB-01360	这两天刷到不少关于【网络暴力与理性讨论】的讨论，说实话还挺唏嘘的。	1	2	22	4	1	1
WB-01361	【读书博主推荐争议】又上热搜了，看评论区真的什么声音都有。	1	1	11	4	2	4
WB-01362	这两天刷到不少关于【年度爆款综艺】的讨论，说实话还挺唏嘘的。	1	3	33	2	1	3
WB-01363	【知识付费是否值得】又上热搜了，看评论区真的什么声音都有。	1	2	23	2	3	3
WB-01364	这两天刷到不少关于【国产剧质量讨论】的讨论，说实话还挺唏嘘的。	1	3	33	4	3	1
WB-01365	【短视频平台的流量机制】又上热搜了，看评论区真的什么声音都有。	1	3	32	4	1	4
WB-01366	【年轻人就业与内卷】又上热搜了，看评论区真的什么声音都有。	1	3	33	3	2	3
WB-01367	不得不说，【网络暴力与理性讨论】最近的讨论热度确实有点夸张。	1	1	13	1	3	1
WB-01368	不得不说，【短视频平台的流量机制】最近的讨论热度确实有点夸张。	1	1	13	1	1	3
WB-01369	【年轻人就业与内卷】又上热搜了，看评论区真的什么声音都有。	1	3	31	4	3	2
WB-01370	这两天刷到不少关于【公共事件中的信息透明度】的讨论，说实话还挺唏嘘的。	1	3	33	3	1	3
WB-01371	【情绪价值消费】又上热搜了，看评论区真的什么声音都有。	1	3	32	2	3	3
WB-01372	这两天刷到不少关于【年轻人就业与内卷】的讨论，说实话还挺唏嘘的。	1	3	33	2	2	4
WB-01373	这两天刷到不少关于【情绪价值消费】的讨论，说实话还挺唏嘘的。	1	3	31	4	1	1
WB-01374	关于【年度爆款综艺】这件事，大家关注点好像越来越偏了。	1	3	33	4	2	4
WB-01375	这两天刷到不少关于【明星塌房后的舆论反转】的讨论，说实话还挺唏嘘的。	1	2	22	3	1	4
WB-01376	这两天刷到不少关于【女性议题与舆论分化】的讨论，说实话还挺唏嘘的。	1	3	31	2	2	3
WB-01377	关于【读书博主推荐争议】这件事，大家关注点好像越来越偏了。	1	3	32	4	3	1
WB-01378	关于【知识付费是否值得】这件事，大家关注点好像越来越偏了。	1	2	21	2	1	2
WB-01379	不得不说，【公共事件中的信息透明度】最近的讨论热度确实有点夸张。	1	3	31	3	3	3
WB-01380	关于【知识付费是否值得】这件事，大家关注点好像越来越偏了。	1	2	22	2	3	1
WB-01381	这两天刷到不少关于【网红带货翻车事件】的讨论，说实话还挺唏嘘的。	1	3	32	2	2	1
WB-01382	【短视频平台的流量机制】又上热搜了，看评论区真的什么声音都有。	1	2	22	3	3	3
WB-01383	【明星塌房后的舆论反转】又上热搜了，看评论区真的什么声音都有。	1	2	21	2	3	4
WB-01384	关于【读书博主推荐争议】这件事，大家关注点好像越来越偏了。	1	1	14	1	3	2
WB-01385	关于【明星塌房后的舆论反转】这件事，大家关注点好像越来越偏了。	1	1	14	4	2	1
WB-01386	不得不说，【短视频平台的流量机制】最近的讨论热度确实有点夸张。	1	3	32	4	1	1
WB-01387	【情绪价值消费】又上热搜了，看评论区真的什么声音都有。	1	2	21	1	3	2
WB-01388	不得不说，【网红带货翻车事件】最近的讨论热度确实有点夸张。	1	1	12	1	1	2
WB-01389	【知识付费是否值得】又上热搜了，看评论区真的什么声音都有。	1	3	32	1	2	3
WB-01390	这两天刷到不少关于【年轻人就业与内卷】的讨论，说实话还挺唏嘘的。	1	1	14	2	1	2
WB-01391	这两天刷到不少关于【读书博主推荐争议】的讨论，说实话还挺唏嘘的。	1	2	21	1	3	4
WB-01392	这两天刷到不少关于【年度爆款综艺】的讨论，说实话还挺唏嘘的。	1	1	14	4	3	3
WB-01393	不得不说，【网红带货翻车事件】最近的讨论热度确实有点夸张。	1	2	23	2	1	2
WB-01394	关于【知识付费是否值得】这件事，大家关注点好像越来越偏了。	1	2	21	4	3	1
WB-01395	关于【影视改编争议】这件事，大家关注点好像越来越偏了。	1	3	31	2	1	3
WB-01396	这两天刷到不少关于【影视改编争议】的讨论，说实话还挺唏嘘的。	1	1	11	3	3	4
WB-01397	这两天刷到不少关于【城市生活成本上升】的讨论，说实话还挺唏嘘的。	1	1	11	1	1	3
WB-01398	不得不说，【网络暴力与理性讨论】最近的讨论热度确实有点夸张。	1	3	33	2	1	3
WB-01399	这两天刷到不少关于【平台算法推荐问题】的讨论，说实话还挺唏嘘的。	1	1	14	1	2	1
WB-01400	【网络暴力与理性讨论】又上热搜了，看评论区真的什么声音都有。	1	1	13	1	2	1
WB-01401	【平台算法推荐问题】又上热搜了，看评论区真的什么声音都有。	1	2	21	1	1	3
WB-01402	这两天刷到不少关于【影视改编争议】的讨论，说实话还挺唏嘘的。	1	2	21	3	1	1
WB-01403	这两天刷到不少关于【读书博主推荐争议】的讨论，说实话还挺唏嘘的。	1	2	22	2	2	1
WB-01404	【公共事件中的信息透明度】又上热搜了，看评论区真的什么声音都有。	1	1	11	1	2	4
WB-01405	【城市生活成本上升】又上热搜了，看评论区真的什么声音都有。	1	2	24	3	3	2
WB-01406	【年轻人就业与内卷】又上热搜了，看评论区真的什么声音都有。	1	3	33	2	3	2
WB-01407	关于【平台算法推荐问题】这件事，大家关注点好像越来越偏了。	1	1	14	3	2	3
WB-01408	不得不说，【网红带货翻车事件】最近的讨论热度确实有点夸张。	1	2	24	2	1	4
WB-01409	不得不说，【城市生活成本上升】最近的讨论热度确实有点夸张。	1	2	23	4	1	4
WB-01410	这两天刷到不少关于【AI写作与创作者焦虑】的讨论，说实话还挺唏嘘的。	1	1	14	3	3	1
WB-01411	关于【明星塌房后的舆论反转】这件事，大家关注点好像越来越偏了。	1	2	21	3	2	1
WB-01412	【年轻人就业与内卷】又上热搜了，看评论区真的什么声音都有。	1	3	32	2	1	3
WB-01413	关于【读书博主推荐争议】这件事，大家关注点好像越来越偏了。	1	1	14	3	1	3
WB-01414	关于【年轻人就业与内卷】这件事，大家关注点好像越来越偏了。	1	2	23	2	1	2
WB-01415	关于【公共事件中的信息透明度】这件事，大家关注点好像越来越偏了。	1	3	32	3	1	4
WB-01416	关于【明星塌房后的舆论反转】这件事，大家关注点好像越来越偏了。	1	2	23	2	3	3
WB-01417	【明星塌房后的舆论反转】又上热搜了，看评论区真的什么声音都有。	1	3	31	1	3	4
WB-01418	不得不说，【明星塌房后的舆论反转】最近的讨论热度确实有点夸张。	1	1	11	3	2	4
WB-01419	不得不说，【AI写作与创作者焦虑】最近的讨论热度确实有点夸张。	1	2	21	2	2	3
WB-01420	【女性议题与舆论分化】又上热搜了，看评论区真的什么声音都有。	1	1	14	2	2	1
WB-01421	这两天刷到不少关于【网络暴力与理性讨论】的讨论，说实话还挺唏嘘的。	1	1	11	4	2	2
WB-01422	关于【年轻人就业与内卷】这件事，大家关注点好像越来越偏了。	1	3	31	1	1	2
WB-01423	不得不说，【AI写作与创作者焦虑】最近的讨论热度确实有点夸张。	1	1	13	2	3	2
WB-01424	关于【平台算法推荐问题】这件事，大家关注点好像越来越偏了。	1	3	31	2	1	3
WB-01425	【平台算法推荐问题】又上热搜了，看评论区真的什么声音都有。	1	3	32	2	3	1
WB-01426	关于【网络暴力与理性讨论】这件事，大家关注点好像越来越偏了。	1	1	13	1	2	4
WB-01427	这两天刷到不少关于【情绪价值消费】的讨论，说实话还挺唏嘘的。	1	2	24	3	1	3
WB-01428	不得不说，【女性议题与舆论分化】最近的讨论热度确实有点夸张。	1	1	12	2	1	2
WB-01429	【影视改编争议】又上热搜了，看评论区真的什么声音都有。	1	2	21	2	1	4
WB-01430	不得不说，【网络暴力与理性讨论】最近的讨论热度确实有点夸张。	1	3	33	1	2	2
WB-01431	不得不说，【网红带货翻车事件】最近的讨论热度确实有点夸张。	1	1	13	4	3	3
WB-01432	不得不说，【读书博主推荐争议】最近的讨论热度确实有点夸张。	1	3	33	3	1	4
WB-01433	这两天刷到不少关于【公共事件中的信息透明度】的讨论，说实话还挺唏嘘的。	1	2	21	4	3	4
WB-01434	关于【AI写作与创作者焦虑】这件事，大家关注点好像越来越偏了。	1	2	23	1	2	2
WB-01435	关于【网络暴力与理性讨论】这件事，大家关注点好像越来越偏了。	1	2	21	3	2	2
WB-01436	这两天刷到不少关于【知识付费是否值得】的讨论，说实话还挺唏嘘的。	1	2	24	4	2	4
WB-01437	【年轻人就业与内卷】又上热搜了，看评论区真的什么声音都有。	1	2	24	3	1	3
WB-01438	关于【年轻人就业与内卷】这件事，大家关注点好像越来越偏了。	1	2	22	1	3	3
WB-01439	这两天刷到不少关于【城市生活成本上升】的讨论，说实话还挺唏嘘的。	1	2	21	1	3	3
WB-01440	关于【短视频平台的流量机制】这件事，大家关注点好像越来越偏了。	1	3	33	3	3	1
WB-01441	不得不说，【网红带货翻车事件】最近的讨论热度确实有点夸张。	1	3	32	1	3	4
WB-01442	不得不说，【公共事件中的信息透明度】最近的讨论热度确实有点夸张。	1	1	13	3	3	4
WB-01443	关于【网红带货翻车事件】这件事，大家关注点好像越来越偏了。	1	1	13	2	3	1
WB-01444	不得不说，【影视改编争议】最近的讨论热度确实有点夸张。	1	3	31	2	3	4
WB-01445	关于【网络暴力与理性讨论】这件事，大家关注点好像越来越偏了。	1	2	24	1	2	2
WB-01446	不得不说，【年度爆款综艺】最近的讨论热度确实有点夸张。	1	3	31	1	2	1
WB-01447	【年度爆款综艺】又上热搜了，看评论区真的什么声音都有。	1	3	33	1	2	1
WB-01448	这两天刷到不少关于【国产剧质量讨论】的讨论，说实话还挺唏嘘的。	1	3	31	1	1	4
WB-01449	【年度爆款综艺】又上热搜了，看评论区真的什么声音都有。	1	2	21	2	2	2
WB-01450	这两天刷到不少关于【明星塌房后的舆论反转】的讨论，说实话还挺唏嘘的。	1	2	24	1	3	1
WB-01451	这两天刷到不少关于【年轻人就业与内卷】的讨论，说实话还挺唏嘘的。	1	2	24	1	2	4
WB-01452	不得不说，【明星塌房后的舆论反转】最近的讨论热度确实有点夸张。	1	3	33	3	1	4
WB-01453	【城市生活成本上升】又上热搜了，看评论区真的什么声音都有。	1	1	13	2	2	2
WB-01454	关于【城市生活成本上升】这件事，大家关注点好像越来越偏了。	1	3	32	2	1	4
WB-01455	不得不说，【AI写作与创作者焦虑】最近的讨论热度确实有点夸张。	1	1	11	4	2	1
WB-01456	这两天刷到不少关于【读书博主推荐争议】的讨论，说实话还挺唏嘘的。	1	3	33	4	3	3
WB-01457	这两天刷到不少关于【读书博主推荐争议】的讨论，说实话还挺唏嘘的。	1	3	31	4	3	2
WB-01458	不得不说，【年轻人就业与内卷】最近的讨论热度确实有点夸张。	1	2	23	1	1	4
WB-01459	关于【女性议题与舆论分化】这件事，大家关注点好像越来越偏了。	1	2	21	3	3	3
WB-01460	【年轻人就业与内卷】又上热搜了，看评论区真的什么声音都有。	1	2	23	1	2	1
WB-01461	这两天刷到不少关于【影视改编争议】的讨论，说实话还挺唏嘘的。	1	2	23	4	2	3
WB-01462	关于【情绪价值消费】这件事，大家关注点好像越来越偏了。	1	3	33	4	1	3
WB-01463	关于【年轻人就业与内卷】这件事，大家关注点好像越来越偏了。	1	1	11	4	3	1
WB-01464	不得不说，【城市生活成本上升】最近的讨论热度确实有点夸张。	1	2	22	3	1	2
WB-01465	【公共事件中的信息透明度】又上热搜了，看评论区真的什么声音都有。	1	2	21	2	2	2
WB-01466	【平台算法推荐问题】又上热搜了，看评论区真的什么声音都有。	1	2	24	3	1	4
WB-01467	这两天刷到不少关于【网络暴力与理性讨论】的讨论，说实话还挺唏嘘的。	1	2	21	4	1	3
WB-01468	这两天刷到不少关于【国产剧质量讨论】的讨论，说实话还挺唏嘘的。	1	3	33	3	3	1
WB-01469	这两天刷到不少关于【年度爆款综艺】的讨论，说实话还挺唏嘘的。	1	3	32	3	2	4
WB-01470	不得不说，【年度爆款综艺】最近的讨论热度确实有点夸张。	1	2	21	2	2	1
WB-01471	这两天刷到不少关于【年轻人就业与内卷】的讨论，说实话还挺唏嘘的。	1	3	31	1	3	4
WB-01472	【公共事件中的信息透明度】又上热搜了，看评论区真的什么声音都有。	1	1	14	3	1	4
WB-01473	【女性议题与舆论分化】又上热搜了，看评论区真的什么声音都有。	1	1	14	3	3	2
WB-01474	关于【年度爆款综艺】这件事，大家关注点好像越来越偏了。	1	3	31	2	2	4
WB-01475	不得不说，【网络暴力与理性讨论】最近的讨论热度确实有点夸张。	1	3	32	3	1	2
WB-01476	【女性议题与舆论分化】又上热搜了，看评论区真的什么声音都有。	1	1	12	1	3	1
WB-01477	【情绪价值消费】又上热搜了，看评论区真的什么声音都有。	1	3	32	3	1	4
WB-01478	【国产剧质量讨论】又上热搜了，看评论区真的什么声音都有。	1	1	11	1	3	1
WB-01479	关于【网络暴力与理性讨论】这件事，大家关注点好像越来越偏了。	1	3	31	1	1	3
WB-01480	这两天刷到不少关于【明星塌房后的舆论反转】的讨论，说实话还挺唏嘘的。	1	1	14	4	3	3
WB-01481	【明星塌房后的舆论反转】又上热搜了，看评论区真的什么声音都有。	1	3	32	3	1	1
WB-01482	【AI写作与创作者焦虑】又上热搜了，看评论区真的什么声音都有。	1	2	24	3	3	2
WB-01483	关于【国产剧质量讨论】这件事，大家关注点好像越来越偏了。	1	3	31	2	2	4
WB-01484	这两天刷到不少关于【网络暴力与理性讨论】的讨论，说实话还挺唏嘘的。	1	3	31	1	1	4
WB-01485	关于【国产剧质量讨论】这件事，大家关注点好像越来越偏了。	1	1	11	3	2	4
WB-01486	关于【公共事件中的信息透明度】这件事，大家关注点好像越来越偏了。	1	2	23	3	2	3
WB-01487	不得不说，【读书博主推荐争议】最近的讨论热度确实有点夸张。	1	2	22	2	2	1
WB-01488	不得不说，【网红带货翻车事件】最近的讨论热度确实有点夸张。	1	2	24	1	2	2
WB-01489	这两天刷到不少关于【影视改编争议】的讨论，说实话还挺唏嘘的。	1	1	13	2	2	1
WB-01490	不得不说，【网络暴力与理性讨论】最近的讨论热度确实有点夸张。	1	3	33	4	3	1
WB-01491	关于【城市生活成本上升】这件事，大家关注点好像越来越偏了。	1	3	33	1	3	3
WB-01492	这两天刷到不少关于【城市生活成本上升】的讨论，说实话还挺唏嘘的。	1	2	21	3	3	4
WB-01493	这两天刷到不少关于【年度爆款综艺】的讨论，说实话还挺唏嘘的。	1	3	31	3	1	1
WB-01494	这两天刷到不少关于【影视改编争议】的讨论，说实话还挺唏嘘的。	1	1	14	3	3	1
WB-01495	不得不说，【国产剧质量讨论】最近的讨论热度确实有点夸张。	1	1	12	4	1	2
WB-01496	关于【平台算法推荐问题】这件事，大家关注点好像越来越偏了。	1	2	24	3	3	4
WB-01497	不得不说，【年轻人就业与内卷】最近的讨论热度确实有点夸张。	1	1	11	2	1	2
WB-01498	关于【网红带货翻车事件】这件事，大家关注点好像越来越偏了。	1	3	31	2	3	2
WB-01499	关于【公共事件中的信息透明度】这件事，大家关注点好像越来越偏了。	1	1	12	1	2	2
WB-01500	不得不说，【网红带货翻车事件】最近的讨论热度确实有点夸张。	1	1	14	2	2	3
WB-01501	不得不说，【国产剧质量讨论】最近的讨论热度确实有点夸张。	1	1	12	4	1	1
WB-01502	这两天刷到不少关于【国产剧质量讨论】的讨论，说实话还挺唏嘘的。	1	3	31	2	1	1
WB-01503	这两天刷到不少关于【网红带货翻车事件】的讨论，说实话还挺唏嘘的。	1	3	31	1	1	4
WB-01504	这两天刷到不少关于【AI写作与创作者焦虑】的讨论，说实话还挺唏嘘的。	1	2	22	4	1	1
WB-01505	不得不说，【年度爆款综艺】最近的讨论热度确实有点夸张。	1	3	32	3	2	3
WB-01506	关于【情绪价值消费】这件事，大家关注点好像越来越偏了。	1	2	22	3	2	4
WB-01507	关于【情绪价值消费】这件事，大家关注点好像越来越偏了。	1	2	21	1	1	2
WB-01508	【网络暴力与理性讨论】又上热搜了，看评论区真的什么声音都有。	1	3	31	3	2	3
WB-01509	这两天刷到不少关于【情绪价值消费】的讨论，说实话还挺唏嘘的。	1	1	11	4	1	3
WB-01510	不得不说，【影视改编争议】最近的讨论热度确实有点夸张。	1	2	22	2	1	4
WB-01511	关于【读书博主推荐争议】这件事，大家关注点好像越来越偏了。	1	2	23	1	2	4
WB-01512	关于【明星塌房后的舆论反转】这件事，大家关注点好像越来越偏了。	1	1	14	3	1	4
WB-01513	关于【平台算法推荐问题】这件事，大家关注点好像越来越偏了。	1	2	21	2	3	3
WB-01514	【年度爆款综艺】又上热搜了，看评论区真的什么声音都有。	1	3	31	4	1	2
WB-01515	这两天刷到不少关于【网红带货翻车事件】的讨论，说实话还挺唏嘘的。	1	3	31	2	3	3
WB-01516	【读书博主推荐争议】又上热搜了，看评论区真的什么声音都有。	1	3	32	2	3	1
WB-01517	【知识付费是否值得】又上热搜了，看评论区真的什么声音都有。	1	2	23	3	1	1
WB-01518	不得不说，【知识付费是否值得】最近的讨论热度确实有点夸张。	1	2	23	1	1	1
WB-01519	这两天刷到不少关于【年轻人就业与内卷】的讨论，说实话还挺唏嘘的。	1	3	33	3	3	1
WB-01520	不得不说，【情绪价值消费】最近的讨论热度确实有点夸张。	1	2	21	2	2	1
WB-01521	这两天刷到不少关于【国产剧质量讨论】的讨论，说实话还挺唏嘘的。	1	1	13	3	3	4
WB-01522	不得不说，【女性议题与舆论分化】最近的讨论热度确实有点夸张。	1	3	33	1	1	2
WB-01523	这两天刷到不少关于【网络暴力与理性讨论】的讨论，说实话还挺唏嘘的。	1	2	21	2	1	2
WB-01524	不得不说，【情绪价值消费】最近的讨论热度确实有点夸张。	1	1	14	3	1	3
WB-01525	【短视频平台的流量机制】又上热搜了，看评论区真的什么声音都有。	1	1	11	4	1	1
WB-01526	这两天刷到不少关于【短视频平台的流量机制】的讨论，说实话还挺唏嘘的。	1	1	14	3	1	2
WB-01527	不得不说，【读书博主推荐争议】最近的讨论热度确实有点夸张。	1	1	12	3	2	4
WB-01528	【明星塌房后的舆论反转】又上热搜了，看评论区真的什么声音都有。	1	3	33	4	2	4
WB-01529	【情绪价值消费】又上热搜了，看评论区真的什么声音都有。	1	1	12	1	3	2
WB-01530	这两天刷到不少关于【网红带货翻车事件】的讨论，说实话还挺唏嘘的。	1	3	31	4	1	3
WB-01531	不得不说，【影视改编争议】最近的讨论热度确实有点夸张。	1	1	13	1	1	2
WB-01532	【短视频平台的流量机制】又上热搜了，看评论区真的什么声音都有。	1	3	32	2	3	3
WB-01533	【AI写作与创作者焦虑】又上热搜了，看评论区真的什么声音都有。	1	3	32	2	2	3
WB-01534	这两天刷到不少关于【城市生活成本上升】的讨论，说实话还挺唏嘘的。	1	3	31	4	3	4
WB-01535	关于【短视频平台的流量机制】这件事，大家关注点好像越来越偏了。	1	1	12	4	3	3
WB-01536	不得不说，【国产剧质量讨论】最近的讨论热度确实有点夸张。	1	3	31	4	1	3
WB-01537	关于【平台算法推荐问题】这件事，大家关注点好像越来越偏了。	1	2	22	2	1	4
WB-01538	【短视频平台的流量机制】又上热搜了，看评论区真的什么声音都有。	1	2	24	3	3	4
WB-01539	不得不说，【AI写作与创作者焦虑】最近的讨论热度确实有点夸张。	1	2	21	1	2	4
WB-01540	【知识付费是否值得】又上热搜了，看评论区真的什么声音都有。	1	2	22	1	1	2
WB-01541	不得不说，【平台算法推荐问题】最近的讨论热度确实有点夸张。	1	2	24	2	2	3
WB-01542	【年度爆款综艺】又上热搜了，看评论区真的什么声音都有。	1	1	12	2	3	3
WB-01543	关于【读书博主推荐争议】这件事，大家关注点好像越来越偏了。	1	3	31	4	3	4
WB-01544	【读书博主推荐争议】又上热搜了，看评论区真的什么声音都有。	1	1	12	3	2	2
WB-01545	【明星塌房后的舆论反转】又上热搜了，看评论区真的什么声音都有。	1	2	23	2	2	1
WB-01546	这两天刷到不少关于【网络暴力与理性讨论】的讨论，说实话还挺唏嘘的。	1	1	13	4	3	1
WB-01547	不得不说，【年度爆款综艺】最近的讨论热度确实有点夸张。	1	1	12	1	2	2
WB-01548	这两天刷到不少关于【短视频平台的流量机制】的讨论，说实话还挺唏嘘的。	1	2	24	2	3	4
WB-01549	这两天刷到不少关于【知识付费是否值得】的讨论，说实话还挺唏嘘的。	1	1	12	3	3	4
WB-01550	【网红带货翻车事件】又上热搜了，看评论区真的什么声音都有。	1	2	22	3	2	3
WB-01551	【年度爆款综艺】又上热搜了，看评论区真的什么声音都有。	1	3	32	2	2	4
WB-01552	【城市生活成本上升】又上热搜了，看评论区真的什么声音都有。	1	2	21	3	1	1
WB-01553	这两天刷到不少关于【明星塌房后的舆论反转】的讨论，说实话还挺唏嘘的。	1	2	21	4	2	1
WB-01554	不得不说，【短视频平台的流量机制】最近的讨论热度确实有点夸张。	1	3	31	1	1	4
WB-01555	不得不说，【国产剧质量讨论】最近的讨论热度确实有点夸张。	1	3	33	4	2	4
WB-01556	【女性议题与舆论分化】又上热搜了，看评论区真的什么声音都有。	1	3	32	1	3	3
WB-01557	不得不说，【年度爆款综艺】最近的讨论热度确实有点夸张。	1	1	13	3	3	2
WB-01558	关于【城市生活成本上升】这件事，大家关注点好像越来越偏了。	1	1	14	2	2	2
WB-01559	【平台算法推荐问题】又上热搜了，看评论区真的什么声音都有。	1	1	11	2	2	1
WB-01560	关于【网红带货翻车事件】这件事，大家关注点好像越来越偏了。	1	1	11	1	3	3
WB-01561	【知识付费是否值得】又上热搜了，看评论区真的什么声音都有。	1	3	32	3	2	2
WB-01562	这两天刷到不少关于【女性议题与舆论分化】的讨论，说实话还挺唏嘘的。	1	1	14	3	1	4
WB-01563	关于【女性议题与舆论分化】这件事，大家关注点好像越来越偏了。	1	1	11	2	1	4
WB-01564	不得不说，【短视频平台的流量机制】最近的讨论热度确实有点夸张。	1	2	23	4	2	4
WB-01565	【短视频平台的流量机制】又上热搜了，看评论区真的什么声音都有。	1	2	22	2	1	3
WB-01566	这两天刷到不少关于【知识付费是否值得】的讨论，说实话还挺唏嘘的。	1	2	21	4	2	1
WB-01567	不得不说，【情绪价值消费】最近的讨论热度确实有点夸张。	1	3	32	3	3	3
WB-01568	不得不说，【平台算法推荐问题】最近的讨论热度确实有点夸张。	1	3	31	3	2	1
WB-01569	关于【网红带货翻车事件】这件事，大家关注点好像越来越偏了。	1	3	33	1	1	1
WB-01570	【影视改编争议】又上热搜了，看评论区真的什么声音都有。	1	3	33	1	1	4
WB-01571	这两天刷到不少关于【年轻人就业与内卷】的讨论，说实话还挺唏嘘的。	1	2	21	4	1	2
WB-01572	关于【女性议题与舆论分化】这件事，大家关注点好像越来越偏了。	1	3	33	3	2	1
WB-01573	这两天刷到不少关于【知识付费是否值得】的讨论，说实话还挺唏嘘的。	1	2	23	1	1	2
WB-01574	【城市生活成本上升】又上热搜了，看评论区真的什么声音都有。	1	3	33	3	1	1
WB-01575	关于【明星塌房后的舆论反转】这件事，大家关注点好像越来越偏了。	1	2	22	2	1	2
WB-01576	【影视改编争议】又上热搜了，看评论区真的什么声音都有。	1	1	12	3	1	2
WB-01577	不得不说，【国产剧质量讨论】最近的讨论热度确实有点夸张。	1	1	13	1	1	4
WB-01578	不得不说，【国产剧质量讨论】最近的讨论热度确实有点夸张。	1	1	12	1	1	2
WB-01579	这两天刷到不少关于【女性议题与舆论分化】的讨论，说实话还挺唏嘘的。	1	1	14	4	3	1
WB-01580	关于【城市生活成本上升】这件事，大家关注点好像越来越偏了。	1	1	12	1	1	1
WB-01581	这两天刷到不少关于【AI写作与创作者焦虑】的讨论，说实话还挺唏嘘的。	1	2	24	2	3	4
WB-01582	不得不说，【读书博主推荐争议】最近的讨论热度确实有点夸张。	1	2	21	3	3	2
WB-01583	【国产剧质量讨论】又上热搜了，看评论区真的什么声音都有。	1	1	13	2	3	1
WB-01584	不得不说，【AI写作与创作者焦虑】最近的讨论热度确实有点夸张。	1	1	12	1	1	1
WB-01585	关于【影视改编争议】这件事，大家关注点好像越来越偏了。	1	2	22	2	2	2
WB-01586	【女性议题与舆论分化】又上热搜了，看评论区真的什么声音都有。	1	1	13	2	3	1
WB-01587	不得不说，【AI写作与创作者焦虑】最近的讨论热度确实有点夸张。	1	3	32	4	2	1
WB-01588	关于【网络暴力与理性讨论】这件事，大家关注点好像越来越偏了。	1	1	11	2	2	4
WB-01589	【影视改编争议】又上热搜了，看评论区真的什么声音都有。	1	1	12	2	1	4
WB-01590	不得不说，【公共事件中的信息透明度】最近的讨论热度确实有点夸张。	1	3	31	3	2	2
WB-01591	【知识付费是否值得】又上热搜了，看评论区真的什么声音都有。	1	3	31	3	3	1
WB-01592	【网络暴力与理性讨论】又上热搜了，看评论区真的什么声音都有。	1	3	33	3	2	3
WB-01593	【年轻人就业与内卷】又上热搜了，看评论区真的什么声音都有。	1	2	24	3	2	4
WB-01594	这两天刷到不少关于【国产剧质量讨论】的讨论，说实话还挺唏嘘的。	1	3	32	2	2	2
WB-01595	【国产剧质量讨论】又上热搜了，看评论区真的什么声音都有。	1	2	22	1	1	2
WB-01596	关于【明星塌房后的舆论反转】这件事，大家关注点好像越来越偏了。	1	1	14	3	1	2
WB-01597	不得不说，【年度爆款综艺】最近的讨论热度确实有点夸张。	1	2	24	4	1	3
WB-01598	关于【网红带货翻车事件】这件事，大家关注点好像越来越偏了。	1	3	32	2	2	1
WB-01599	这两天刷到不少关于【女性议题与舆论分化】的讨论，说实话还挺唏嘘的。	1	2	21	1	1	1
WB-01600	不得不说，【城市生活成本上升】最近的讨论热度确实有点夸张。	1	2	24	2	1	2
WB-01601	不得不说，【城市生活成本上升】最近的讨论热度确实有点夸张。	1	1	12	3	1	2
WB-01602	不得不说，【读书博主推荐争议】最近的讨论热度确实有点夸张。	1	1	11	1	1	1
WB-01603	【女性议题与舆论分化】又上热搜了，看评论区真的什么声音都有。	1	3	33	3	3	2
WB-01604	【知识付费是否值得】又上热搜了，看评论区真的什么声音都有。	1	1	11	3	2	2
WB-01605	【明星塌房后的舆论反转】又上热搜了，看评论区真的什么声音都有。	1	3	33	3	3	1
WB-01606	【女性议题与舆论分化】又上热搜了，看评论区真的什么声音都有。	1	3	31	2	3	3
WB-01607	关于【平台算法推荐问题】这件事，大家关注点好像越来越偏了。	1	1	11	2	3	2
WB-01608	关于【年轻人就业与内卷】这件事，大家关注点好像越来越偏了。	1	1	11	4	2	4
WB-01609	不得不说，【情绪价值消费】最近的讨论热度确实有点夸张。	1	3	31	3	3	1
WB-01610	关于【情绪价值消费】这件事，大家关注点好像越来越偏了。	1	1	12	3	2	1
WB-01611	这两天刷到不少关于【网红带货翻车事件】的讨论，说实话还挺唏嘘的。	1	2	23	4	2	4
WB-01612	【平台算法推荐问题】又上热搜了，看评论区真的什么声音都有。	1	2	23	4	1	3
WB-01613	这两天刷到不少关于【公共事件中的信息透明度】的讨论，说实话还挺唏嘘的。	1	2	22	2	1	4
WB-01614	这两天刷到不少关于【国产剧质量讨论】的讨论，说实话还挺唏嘘的。	1	1	12	4	3	3
WB-01615	这两天刷到不少关于【公共事件中的信息透明度】的讨论，说实话还挺唏嘘的。	1	1	11	4	1	4
WB-01616	关于【年轻人就业与内卷】这件事，大家关注点好像越来越偏了。	1	1	14	3	3	1
WB-01617	这两天刷到不少关于【年轻人就业与内卷】的讨论，说实话还挺唏嘘的。	1	3	33	2	3	3
WB-01618	这两天刷到不少关于【国产剧质量讨论】的讨论，说实话还挺唏嘘的。	1	3	32	3	3	4
WB-01619	这两天刷到不少关于【平台算法推荐问题】的讨论，说实话还挺唏嘘的。	1	2	24	3	3	1
WB-01620	【读书博主推荐争议】又上热搜了，看评论区真的什么声音都有。	1	1	14	4	3	4
WB-01621	这两天刷到不少关于【年度爆款综艺】的讨论，说实话还挺唏嘘的。	1	1	12	1	2	3
WB-01622	关于【知识付费是否值得】这件事，大家关注点好像越来越偏了。	1	3	31	2	2	3
WB-01623	关于【读书博主推荐争议】这件事，大家关注点好像越来越偏了。	1	2	21	1	1	1
WB-01624	这两天刷到不少关于【网络暴力与理性讨论】的讨论，说实话还挺唏嘘的。	1	3	31	3	2	1
WB-01625	不得不说，【AI写作与创作者焦虑】最近的讨论热度确实有点夸张。	1	2	22	1	1	2
WB-01626	【平台算法推荐问题】又上热搜了，看评论区真的什么声音都有。	1	1	14	1	2	3
WB-01627	不得不说，【网红带货翻车事件】最近的讨论热度确实有点夸张。	1	3	33	2	2	4
WB-01628	【影视改编争议】又上热搜了，看评论区真的什么声音都有。	1	2	24	3	3	1
WB-01629	不得不说，【读书博主推荐争议】最近的讨论热度确实有点夸张。	1	3	33	2	2	4
WB-01630	这两天刷到不少关于【女性议题与舆论分化】的讨论，说实话还挺唏嘘的。	1	1	14	4	2	1
WB-01631	关于【年轻人就业与内卷】这件事，大家关注点好像越来越偏了。	1	3	31	4	1	2
WB-01632	不得不说，【网络暴力与理性讨论】最近的讨论热度确实有点夸张。	1	1	11	1	1	1
WB-01633	【年度爆款综艺】又上热搜了，看评论区真的什么声音都有。	1	3	31	2	3	1
WB-01634	【国产剧质量讨论】又上热搜了，看评论区真的什么声音都有。	1	3	33	2	1	1
WB-01635	这两天刷到不少关于【影视改编争议】的讨论，说实话还挺唏嘘的。	1	2	22	4	3	1
WB-01636	不得不说，【明星塌房后的舆论反转】最近的讨论热度确实有点夸张。	1	3	33	4	3	3
WB-01637	这两天刷到不少关于【年轻人就业与内卷】的讨论，说实话还挺唏嘘的。	1	2	21	3	1	1
WB-01638	【短视频平台的流量机制】又上热搜了，看评论区真的什么声音都有。	1	2	22	2	1	1
WB-01639	这两天刷到不少关于【AI写作与创作者焦虑】的讨论，说实话还挺唏嘘的。	1	2	24	2	2	2
WB-01640	这两天刷到不少关于【AI写作与创作者焦虑】的讨论，说实话还挺唏嘘的。	1	3	32	1	3	4
WB-01641	【情绪价值消费】又上热搜了，看评论区真的什么声音都有。	1	3	32	2	2	2
WB-01642	关于【读书博主推荐争议】这件事，大家关注点好像越来越偏了。	1	2	23	4	3	2
WB-01643	不得不说，【国产剧质量讨论】最近的讨论热度确实有点夸张。	1	2	24	2	3	3
WB-01644	这两天刷到不少关于【平台算法推荐问题】的讨论，说实话还挺唏嘘的。	1	3	32	2	1	2
WB-01645	不得不说，【网络暴力与理性讨论】最近的讨论热度确实有点夸张。	1	1	11	4	3	3
WB-01646	不得不说，【年度爆款综艺】最近的讨论热度确实有点夸张。	1	2	24	1	2	4
WB-01647	【城市生活成本上升】又上热搜了，看评论区真的什么声音都有。	1	1	12	3	2	1
WB-01648	不得不说，【平台算法推荐问题】最近的讨论热度确实有点夸张。	1	2	24	2	1	2
WB-01649	关于【女性议题与舆论分化】这件事，大家关注点好像越来越偏了。	1	2	21	3	1	1
WB-01650	不得不说，【年度爆款综艺】最近的讨论热度确实有点夸张。	1	1	12	1	3	2
WB-01651	这两天刷到不少关于【女性议题与舆论分化】的讨论，说实话还挺唏嘘的。	1	1	11	1	3	1
WB-01652	这两天刷到不少关于【国产剧质量讨论】的讨论，说实话还挺唏嘘的。	1	2	22	4	1	4
WB-01653	【年轻人就业与内卷】又上热搜了，看评论区真的什么声音都有。	1	2	22	4	2	1
WB-01654	关于【网络暴力与理性讨论】这件事，大家关注点好像越来越偏了。	1	3	33	3	2	2
WB-01655	不得不说，【国产剧质量讨论】最近的讨论热度确实有点夸张。	1	3	33	1	2	3
WB-01656	这两天刷到不少关于【女性议题与舆论分化】的讨论，说实话还挺唏嘘的。	1	1	12	1	2	3
WB-01657	关于【平台算法推荐问题】这件事，大家关注点好像越来越偏了。	1	3	32	3	3	4
WB-01658	【短视频平台的流量机制】又上热搜了，看评论区真的什么声音都有。	1	3	32	2	3	4
WB-01659	不得不说，【国产剧质量讨论】最近的讨论热度确实有点夸张。	1	3	31	4	1	2
WB-01660	这两天刷到不少关于【平台算法推荐问题】的讨论，说实话还挺唏嘘的。	1	2	24	4	3	2
WB-01661	【影视改编争议】又上热搜了，看评论区真的什么声音都有。	1	3	31	4	1	1
WB-01662	【国产剧质量讨论】又上热搜了，看评论区真的什么声音都有。	1	3	31	1	2	3
WB-01663	这两天刷到不少关于【网络暴力与理性讨论】的讨论，说实话还挺唏嘘的。	1	1	12	3	2	3
WB-01664	不得不说，【国产剧质量讨论】最近的讨论热度确实有点夸张。	1	2	22	3	2	3
WB-01665	【读书博主推荐争议】又上热搜了，看评论区真的什么声音都有。	1	1	12	2	2	2
WB-01666	不得不说，【年轻人就业与内卷】最近的讨论热度确实有点夸张。	1	2	24	4	3	2
WB-01667	关于【网络暴力与理性讨论】这件事，大家关注点好像越来越偏了。	1	1	12	2	1	4
WB-01668	关于【明星塌房后的舆论反转】这件事，大家关注点好像越来越偏了。	1	2	23	1	3	3
WB-01669	关于【平台算法推荐问题】这件事，大家关注点好像越来越偏了。	1	2	24	3	1	2
WB-01670	不得不说，【公共事件中的信息透明度】最近的讨论热度确实有点夸张。	1	3	31	3	1	1
WB-01671	【年轻人就业与内卷】又上热搜了，看评论区真的什么声音都有。	1	1	12	3	3	3
WB-01672	不得不说，【网红带货翻车事件】最近的讨论热度确实有点夸张。	1	3	32	2	3	4
WB-01673	这两天刷到不少关于【网红带货翻车事件】的讨论，说实话还挺唏嘘的。	1	3	33	1	3	3
WB-01674	不得不说，【情绪价值消费】最近的讨论热度确实有点夸张。	1	3	31	3	2	3
WB-01675	不得不说，【网红带货翻车事件】最近的讨论热度确实有点夸张。	1	3	32	1	3	4
WB-01676	关于【年度爆款综艺】这件事，大家关注点好像越来越偏了。	1	2	21	1	2	2
WB-01677	关于【国产剧质量讨论】这件事，大家关注点好像越来越偏了。	1	2	21	3	2	1
WB-01678	【网络暴力与理性讨论】又上热搜了，看评论区真的什么声音都有。	1	1	14	2	3	4
WB-01679	关于【影视改编争议】这件事，大家关注点好像越来越偏了。	1	3	33	3	2	1
WB-01680	这两天刷到不少关于【读书博主推荐争议】的讨论，说实话还挺唏嘘的。	1	1	12	1	2	4
WB-01681	关于【AI写作与创作者焦虑】这件事，大家关注点好像越来越偏了。	1	2	24	3	1	4
WB-01682	不得不说，【网络暴力与理性讨论】最近的讨论热度确实有点夸张。	1	3	32	3	3	3
WB-01683	关于【城市生活成本上升】这件事，大家关注点好像越来越偏了。	1	3	31	3	1	2
WB-01684	【影视改编争议】又上热搜了，看评论区真的什么声音都有。	1	1	14	1	1	1
WB-01685	这两天刷到不少关于【女性议题与舆论分化】的讨论，说实话还挺唏嘘的。	1	1	11	4	1	2
WB-01686	关于【城市生活成本上升】这件事，大家关注点好像越来越偏了。	1	3	33	4	1	2
WB-01687	关于【情绪价值消费】这件事，大家关注点好像越来越偏了。	1	1	11	2	2	1
WB-01688	这两天刷到不少关于【影视改编争议】的讨论，说实话还挺唏嘘的。	1	2	22	3	1	4
WB-01689	不得不说，【年轻人就业与内卷】最近的讨论热度确实有点夸张。	1	3	32	4	1	2
WB-01690	不得不说，【国产剧质量讨论】最近的讨论热度确实有点夸张。	1	2	23	3	2	1
WB-01691	【女性议题与舆论分化】又上热搜了，看评论区真的什么声音都有。	1	1	13	4	3	4
WB-01692	不得不说，【影视改编争议】最近的讨论热度确实有点夸张。	1	3	33	3	2	1
WB-01693	【明星塌房后的舆论反转】又上热搜了，看评论区真的什么声音都有。	1	3	32	4	1	3
WB-01694	不得不说，【网络暴力与理性讨论】最近的讨论热度确实有点夸张。	1	1	14	1	3	2
WB-01695	关于【明星塌房后的舆论反转】这件事，大家关注点好像越来越偏了。	1	1	14	4	3	2
WB-01696	这两天刷到不少关于【平台算法推荐问题】的讨论，说实话还挺唏嘘的。	1	2	23	4	1	4
WB-01697	【女性议题与舆论分化】又上热搜了，看评论区真的什么声音都有。	1	1	12	3	3	1
WB-01698	不得不说，【明星塌房后的舆论反转】最近的讨论热度确实有点夸张。	1	2	22	2	1	1
WB-01699	这两天刷到不少关于【平台算法推荐问题】的讨论，说实话还挺唏嘘的。	1	3	33	2	3	1
WB-01700	不得不说，【明星塌房后的舆论反转】最近的讨论热度确实有点夸张。	1	2	21	3	3	1
WB-01701	关于【年度爆款综艺】这件事，大家关注点好像越来越偏了。	1	3	32	2	1	1
WB-01702	不得不说，【明星塌房后的舆论反转】最近的讨论热度确实有点夸张。	1	2	23	4	3	3
WB-01703	这两天刷到不少关于【女性议题与舆论分化】的讨论，说实话还挺唏嘘的。	1	1	14	3	2	3
WB-01704	【读书博主推荐争议】又上热搜了，看评论区真的什么声音都有。	1	3	33	4	2	3
WB-01705	这两天刷到不少关于【AI写作与创作者焦虑】的讨论，说实话还挺唏嘘的。	1	1	13	2	1	3
WB-01706	不得不说，【公共事件中的信息透明度】最近的讨论热度确实有点夸张。	1	3	31	1	3	3
WB-01707	不得不说，【AI写作与创作者焦虑】最近的讨论热度确实有点夸张。	1	3	31	3	3	2
WB-01708	关于【短视频平台的流量机制】这件事，大家关注点好像越来越偏了。	1	3	32	1	2	3
WB-01709	不得不说，【AI写作与创作者焦虑】最近的讨论热度确实有点夸张。	1	1	14	3	3	4
WB-01710	关于【女性议题与舆论分化】这件事，大家关注点好像越来越偏了。	1	1	14	4	2	4
WB-01711	不得不说，【读书博主推荐争议】最近的讨论热度确实有点夸张。	1	3	33	1	3	1
WB-01712	不得不说，【短视频平台的流量机制】最近的讨论热度确实有点夸张。	1	2	21	3	3	1
WB-01713	不得不说，【国产剧质量讨论】最近的讨论热度确实有点夸张。	1	2	23	1	3	1
WB-01714	关于【情绪价值消费】这件事，大家关注点好像越来越偏了。	1	1	14	4	1	3
WB-01715	关于【国产剧质量讨论】这件事，大家关注点好像越来越偏了。	1	1	14	4	1	4
WB-01716	【明星塌房后的舆论反转】又上热搜了，看评论区真的什么声音都有。	1	1	13	4	1	3
WB-01717	这两天刷到不少关于【情绪价值消费】的讨论，说实话还挺唏嘘的。	1	3	33	1	1	4
WB-01718	这两天刷到不少关于【网络暴力与理性讨论】的讨论，说实话还挺唏嘘的。	1	1	11	2	2	4
WB-01719	不得不说，【网红带货翻车事件】最近的讨论热度确实有点夸张。	1	2	23	3	3	2
WB-01720	这两天刷到不少关于【女性议题与舆论分化】的讨论，说实话还挺唏嘘的。	1	3	32	1	3	1
WB-01721	不得不说，【短视频平台的流量机制】最近的讨论热度确实有点夸张。	1	1	14	3	2	4
WB-01722	这两天刷到不少关于【情绪价值消费】的讨论，说实话还挺唏嘘的。	1	2	21	4	3	1
WB-01723	关于【网红带货翻车事件】这件事，大家关注点好像越来越偏了。	1	3	32	3	1	1
WB-01724	这两天刷到不少关于【知识付费是否值得】的讨论，说实话还挺唏嘘的。	1	2	22	2	1	4
WB-01725	不得不说，【网红带货翻车事件】最近的讨论热度确实有点夸张。	1	1	14	3	3	1
WB-01726	【公共事件中的信息透明度】又上热搜了，看评论区真的什么声音都有。	1	3	31	3	2	2
WB-01727	这两天刷到不少关于【公共事件中的信息透明度】的讨论，说实话还挺唏嘘的。	1	1	11	2	2	2
WB-01728	这两天刷到不少关于【明星塌房后的舆论反转】的讨论，说实话还挺唏嘘的。	1	2	21	3	2	3
WB-01729	关于【国产剧质量讨论】这件事，大家关注点好像越来越偏了。	1	2	22	4	3	3
WB-01730	关于【网络暴力与理性讨论】这件事，大家关注点好像越来越偏了。	1	2	23	2	3	3
WB-01731	不得不说，【AI写作与创作者焦虑】最近的讨论热度确实有点夸张。	1	3	32	3	1	4
WB-01732	这两天刷到不少关于【情绪价值消费】的讨论，说实话还挺唏嘘的。	1	2	24	1	3	1
WB-01733	这两天刷到不少关于【国产剧质量讨论】的讨论，说实话还挺唏嘘的。	1	1	12	4	3	4
WB-01734	【知识付费是否值得】又上热搜了，看评论区真的什么声音都有。	1	2	21	1	1	4
WB-01735	【年度爆款综艺】又上热搜了，看评论区真的什么声音都有。	1	3	32	4	3	2
WB-01736	关于【女性议题与舆论分化】这件事，大家关注点好像越来越偏了。	1	3	33	1	2	3
WB-01737	这两天刷到不少关于【影视改编争议】的讨论，说实话还挺唏嘘的。	1	3	31	3	3	2
WB-01738	【城市生活成本上升】又上热搜了，看评论区真的什么声音都有。	1	1	14	3	1	3
WB-01739	关于【知识付费是否值得】这件事，大家关注点好像越来越偏了。	1	1	11	3	1	2
WB-01740	【明星塌房后的舆论反转】又上热搜了，看评论区真的什么声音都有。	1	2	22	3	3	3
WB-01741	不得不说，【明星塌房后的舆论反转】最近的讨论热度确实有点夸张。	1	3	31	4	2	2
WB-01742	不得不说，【明星塌房后的舆论反转】最近的讨论热度确实有点夸张。	1	2	23	2	3	1
WB-01743	【年轻人就业与内卷】又上热搜了，看评论区真的什么声音都有。	1	3	31	4	3	3
WB-01744	【读书博主推荐争议】又上热搜了，看评论区真的什么声音都有。	1	1	12	1	3	4
WB-01745	【网红带货翻车事件】又上热搜了，看评论区真的什么声音都有。	1	3	32	2	2	1
WB-01746	这两天刷到不少关于【女性议题与舆论分化】的讨论，说实话还挺唏嘘的。	1	2	23	2	2	3
WB-01747	关于【短视频平台的流量机制】这件事，大家关注点好像越来越偏了。	1	2	23	4	3	3
WB-01748	这两天刷到不少关于【女性议题与舆论分化】的讨论，说实话还挺唏嘘的。	1	1	14	4	1	1
WB-01749	【情绪价值消费】又上热搜了，看评论区真的什么声音都有。	1	1	12	2	2	3
WB-01750	不得不说，【读书博主推荐争议】最近的讨论热度确实有点夸张。	1	3	33	4	2	2
WB-01751	【网络暴力与理性讨论】又上热搜了，看评论区真的什么声音都有。	1	3	32	4	2	4
WB-01752	这两天刷到不少关于【年轻人就业与内卷】的讨论，说实话还挺唏嘘的。	1	1	13	1	2	3
WB-01753	这两天刷到不少关于【短视频平台的流量机制】的讨论，说实话还挺唏嘘的。	1	2	21	3	3	2
WB-01754	关于【公共事件中的信息透明度】这件事，大家关注点好像越来越偏了。	1	3	31	2	3	1
WB-01755	这两天刷到不少关于【国产剧质量讨论】的讨论，说实话还挺唏嘘的。	1	3	33	2	2	1
WB-01756	这两天刷到不少关于【网红带货翻车事件】的讨论，说实话还挺唏嘘的。	1	2	22	3	3	4
WB-01757	这两天刷到不少关于【短视频平台的流量机制】的讨论，说实话还挺唏嘘的。	1	3	31	3	2	4
WB-01758	关于【城市生活成本上升】这件事，大家关注点好像越来越偏了。	1	1	12	1	2	2
WB-01759	这两天刷到不少关于【影视改编争议】的讨论，说实话还挺唏嘘的。	1	2	24	1	2	3
WB-01760	这两天刷到不少关于【知识付费是否值得】的讨论，说实话还挺唏嘘的。	1	3	32	4	1	1
WB-01761	这两天刷到不少关于【知识付费是否值得】的讨论，说实话还挺唏嘘的。	1	1	13	3	2	4
WB-01762	不得不说，【知识付费是否值得】最近的讨论热度确实有点夸张。	1	2	21	4	1	4
WB-01763	关于【女性议题与舆论分化】这件事，大家关注点好像越来越偏了。	1	1	11	2	1	3
WB-01764	【女性议题与舆论分化】又上热搜了，看评论区真的什么声音都有。	1	2	24	3	1	3
WB-01765	不得不说，【网红带货翻车事件】最近的讨论热度确实有点夸张。	1	2	22	4	1	4
WB-01766	关于【短视频平台的流量机制】这件事，大家关注点好像越来越偏了。	1	2	23	1	2	1
WB-01767	不得不说，【年度爆款综艺】最近的讨论热度确实有点夸张。	1	1	11	3	1	4
WB-01768	这两天刷到不少关于【知识付费是否值得】的讨论，说实话还挺唏嘘的。	1	1	14	1	1	2
WB-01769	关于【明星塌房后的舆论反转】这件事，大家关注点好像越来越偏了。	1	1	12	1	1	2
WB-01770	这两天刷到不少关于【年轻人就业与内卷】的讨论，说实话还挺唏嘘的。	1	2	22	1	3	4
WB-01771	关于【女性议题与舆论分化】这件事，大家关注点好像越来越偏了。	1	3	32	3	1	1
WB-01772	不得不说，【国产剧质量讨论】最近的讨论热度确实有点夸张。	1	2	21	1	3	2
WB-01773	【网络暴力与理性讨论】又上热搜了，看评论区真的什么声音都有。	1	2	22	4	1	3
WB-01774	不得不说，【年轻人就业与内卷】最近的讨论热度确实有点夸张。	1	3	32	1	3	2
WB-01775	不得不说，【女性议题与舆论分化】最近的讨论热度确实有点夸张。	1	1	12	1	2	4
WB-01776	不得不说，【读书博主推荐争议】最近的讨论热度确实有点夸张。	1	2	24	3	2	4
WB-01777	关于【读书博主推荐争议】这件事，大家关注点好像越来越偏了。	1	1	12	1	1	2
WB-01778	这两天刷到不少关于【女性议题与舆论分化】的讨论，说实话还挺唏嘘的。	1	1	13	1	1	1
WB-01779	这两天刷到不少关于【情绪价值消费】的讨论，说实话还挺唏嘘的。	1	2	22	3	1	3
WB-01780	这两天刷到不少关于【公共事件中的信息透明度】的讨论，说实话还挺唏嘘的。	1	2	22	2	1	3
WB-01781	不得不说，【网红带货翻车事件】最近的讨论热度确实有点夸张。	1	3	32	3	2	1
WB-01782	这两天刷到不少关于【国产剧质量讨论】的讨论，说实话还挺唏嘘的。	1	2	21	2	1	4
WB-01783	【年度爆款综艺】又上热搜了，看评论区真的什么声音都有。	1	1	12	4	1	3
WB-01784	关于【年轻人就业与内卷】这件事，大家关注点好像越来越偏了。	1	2	24	2	1	2
WB-01785	【网红带货翻车事件】又上热搜了，看评论区真的什么声音都有。	1	1	11	3	2	2
WB-01786	【公共事件中的信息透明度】又上热搜了，看评论区真的什么声音都有。	1	2	23	4	3	4
WB-01787	关于【网红带货翻车事件】这件事，大家关注点好像越来越偏了。	1	1	13	4	1	2
WB-01788	不得不说，【知识付费是否值得】最近的讨论热度确实有点夸张。	1	2	23	2	3	3
WB-01789	不得不说，【平台算法推荐问题】最近的讨论热度确实有点夸张。	1	1	14	3	2	2
WB-01790	不得不说，【知识付费是否值得】最近的讨论热度确实有点夸张。	1	1	13	2	3	1
WB-01791	【年度爆款综艺】又上热搜了，看评论区真的什么声音都有。	1	1	14	4	3	3
WB-01792	这两天刷到不少关于【AI写作与创作者焦虑】的讨论，说实话还挺唏嘘的。	1	1	11	4	1	4
WB-01793	【明星塌房后的舆论反转】又上热搜了，看评论区真的什么声音都有。	1	1	14	2	2	1
WB-01794	不得不说，【网络暴力与理性讨论】最近的讨论热度确实有点夸张。	1	3	31	3	3	1
WB-01795	不得不说，【知识付费是否值得】最近的讨论热度确实有点夸张。	1	3	32	1	2	3
WB-01796	不得不说，【女性议题与舆论分化】最近的讨论热度确实有点夸张。	1	3	31	3	1	4
WB-01797	这两天刷到不少关于【平台算法推荐问题】的讨论，说实话还挺唏嘘的。	1	1	14	2	3	1
WB-01798	关于【网红带货翻车事件】这件事，大家关注点好像越来越偏了。	1	3	33	4	1	2
WB-01799	【国产剧质量讨论】又上热搜了，看评论区真的什么声音都有。	1	2	21	3	1	1
WB-01800	这两天刷到不少关于【公共事件中的信息透明度】的讨论，说实话还挺唏嘘的。	1	1	11	3	2	2
WB-01801	这两天刷到不少关于【网络暴力与理性讨论】的讨论，说实话还挺唏嘘的。	1	3	31	4	1	2
WB-01802	这两天刷到不少关于【公共事件中的信息透明度】的讨论，说实话还挺唏嘘的。	1	2	24	2	3	2
WB-01803	【情绪价值消费】又上热搜了，看评论区真的什么声音都有。	1	2	23	4	3	1
WB-01804	【知识付费是否值得】又上热搜了，看评论区真的什么声音都有。	1	2	22	2	2	2
WB-01805	不得不说，【读书博主推荐争议】最近的讨论热度确实有点夸张。	1	1	11	4	1	4
WB-01806	关于【情绪价值消费】这件事，大家关注点好像越来越偏了。	1	1	11	3	1	1
WB-01807	【影视改编争议】又上热搜了，看评论区真的什么声音都有。	1	1	13	4	3	1
WB-01808	这两天刷到不少关于【年度爆款综艺】的讨论，说实话还挺唏嘘的。	1	2	24	3	2	1
WB-01809	关于【年轻人就业与内卷】这件事，大家关注点好像越来越偏了。	1	1	13	4	1	1
WB-01810	【影视改编争议】又上热搜了，看评论区真的什么声音都有。	1	2	22	1	1	2
WB-01811	【网红带货翻车事件】又上热搜了，看评论区真的什么声音都有。	1	3	31	3	2	3
WB-01812	这两天刷到不少关于【年轻人就业与内卷】的讨论，说实话还挺唏嘘的。	1	3	33	3	1	2
WB-01813	关于【影视改编争议】这件事，大家关注点好像越来越偏了。	1	2	23	2	1	1
WB-01814	不得不说，【影视改编争议】最近的讨论热度确实有点夸张。	1	3	31	2	2	2
WB-01815	不得不说，【AI写作与创作者焦虑】最近的讨论热度确实有点夸张。	1	3	32	2	3	3
WB-01816	【知识付费是否值得】又上热搜了，看评论区真的什么声音都有。	1	2	24	2	3	1
WB-01817	【年轻人就业与内卷】又上热搜了，看评论区真的什么声音都有。	1	1	13	2	2	4
WB-01818	不得不说，【女性议题与舆论分化】最近的讨论热度确实有点夸张。	1	1	13	4	3	2
WB-01819	这两天刷到不少关于【网红带货翻车事件】的讨论，说实话还挺唏嘘的。	1	3	33	1	3	1
WB-01820	不得不说，【网络暴力与理性讨论】最近的讨论热度确实有点夸张。	1	3	33	1	3	2
WB-01821	【短视频平台的流量机制】又上热搜了，看评论区真的什么声音都有。	1	3	33	2	1	2
WB-01822	关于【知识付费是否值得】这件事，大家关注点好像越来越偏了。	1	3	32	4	1	4
WB-01823	【平台算法推荐问题】又上热搜了，看评论区真的什么声音都有。	1	3	31	4	1	1
WB-01824	不得不说，【国产剧质量讨论】最近的讨论热度确实有点夸张。	1	2	22	4	2	4
WB-01825	不得不说，【知识付费是否值得】最近的讨论热度确实有点夸张。	1	3	33	4	2	1
WB-01826	这两天刷到不少关于【AI写作与创作者焦虑】的讨论，说实话还挺唏嘘的。	1	2	24	1	1	2
WB-01827	关于【公共事件中的信息透明度】这件事，大家关注点好像越来越偏了。	1	2	21	4	2	3
WB-01828	不得不说，【短视频平台的流量机制】最近的讨论热度确实有点夸张。	1	3	33	3	2	3
WB-01829	这两天刷到不少关于【情绪价值消费】的讨论，说实话还挺唏嘘的。	1	2	24	2	3	3
WB-01830	这两天刷到不少关于【网络暴力与理性讨论】的讨论，说实话还挺唏嘘的。	1	3	31	2	1	2
WB-01831	关于【AI写作与创作者焦虑】这件事，大家关注点好像越来越偏了。	1	1	13	3	3	1
WB-01832	关于【年度爆款综艺】这件事，大家关注点好像越来越偏了。	1	3	31	4	3	3
WB-01833	关于【城市生活成本上升】这件事，大家关注点好像越来越偏了。	1	1	11	3	3	3
WB-01834	不得不说，【公共事件中的信息透明度】最近的讨论热度确实有点夸张。	1	3	33	3	3	2
WB-01835	【国产剧质量讨论】又上热搜了，看评论区真的什么声音都有。	1	3	31	2	2	3
WB-01836	关于【女性议题与舆论分化】这件事，大家关注点好像越来越偏了。	1	3	31	1	1	1
WB-01837	【年轻人就业与内卷】又上热搜了，看评论区真的什么声音都有。	1	1	11	1	3	2
WB-01838	不得不说，【城市生活成本上升】最近的讨论热度确实有点夸张。	1	2	24	2	1	1
WB-01839	【网络暴力与理性讨论】又上热搜了，看评论区真的什么声音都有。	1	3	33	1	1	4
WB-01840	【情绪价值消费】又上热搜了，看评论区真的什么声音都有。	1	2	22	4	1	3
WB-01841	不得不说，【AI写作与创作者焦虑】最近的讨论热度确实有点夸张。	1	1	12	1	2	2
WB-01842	【网红带货翻车事件】又上热搜了，看评论区真的什么声音都有。	1	2	23	4	2	4
WB-01843	这两天刷到不少关于【女性议题与舆论分化】的讨论，说实话还挺唏嘘的。	1	1	13	1	3	2
WB-01844	这两天刷到不少关于【城市生活成本上升】的讨论，说实话还挺唏嘘的。	1	3	32	2	3	3
WB-01845	关于【知识付费是否值得】这件事，大家关注点好像越来越偏了。	1	3	33	4	2	2
WB-01846	不得不说，【国产剧质量讨论】最近的讨论热度确实有点夸张。	1	2	23	1	2	3
WB-01847	关于【公共事件中的信息透明度】这件事，大家关注点好像越来越偏了。	1	2	21	2	1	2
WB-01848	关于【网络暴力与理性讨论】这件事，大家关注点好像越来越偏了。	1	1	13	1	2	4
WB-01849	关于【女性议题与舆论分化】这件事，大家关注点好像越来越偏了。	1	3	33	2	3	2
WB-01850	关于【年轻人就业与内卷】这件事，大家关注点好像越来越偏了。	1	1	14	2	2	1
WB-01851	【年轻人就业与内卷】又上热搜了，看评论区真的什么声音都有。	1	2	23	2	3	4
WB-01852	这两天刷到不少关于【影视改编争议】的讨论，说实话还挺唏嘘的。	1	1	11	2	1	3
WB-01853	关于【影视改编争议】这件事，大家关注点好像越来越偏了。	1	2	24	1	2	1
WB-01854	这两天刷到不少关于【读书博主推荐争议】的讨论，说实话还挺唏嘘的。	1	3	33	3	1	1
WB-01855	不得不说，【影视改编争议】最近的讨论热度确实有点夸张。	1	1	11	4	3	3
WB-01856	不得不说，【知识付费是否值得】最近的讨论热度确实有点夸张。	1	2	22	1	3	3
WB-01857	关于【读书博主推荐争议】这件事，大家关注点好像越来越偏了。	1	3	31	2	3	2
WB-01858	关于【读书博主推荐争议】这件事，大家关注点好像越来越偏了。	1	2	21	1	1	1
WB-01859	不得不说，【年度爆款综艺】最近的讨论热度确实有点夸张。	1	1	14	2	1	1
WB-01860	不得不说，【年轻人就业与内卷】最近的讨论热度确实有点夸张。	1	1	12	1	2	2
WB-01861	这两天刷到不少关于【国产剧质量讨论】的讨论，说实话还挺唏嘘的。	1	2	22	1	2	4
WB-01862	【影视改编争议】又上热搜了，看评论区真的什么声音都有。	1	1	11	1	1	4
WB-01863	【影视改编争议】又上热搜了，看评论区真的什么声音都有。	1	2	21	2	3	4
WB-01864	关于【网红带货翻车事件】这件事，大家关注点好像越来越偏了。	1	3	33	1	1	2
WB-01865	这两天刷到不少关于【读书博主推荐争议】的讨论，说实话还挺唏嘘的。	1	1	13	1	2	2
WB-01866	这两天刷到不少关于【网红带货翻车事件】的讨论，说实话还挺唏嘘的。	1	3	33	1	1	1
WB-01867	不得不说，【读书博主推荐争议】最近的讨论热度确实有点夸张。	1	2	23	1	3	3
WB-01868	这两天刷到不少关于【年轻人就业与内卷】的讨论，说实话还挺唏嘘的。	1	3	33	3	2	3
WB-01869	关于【AI写作与创作者焦虑】这件事，大家关注点好像越来越偏了。	1	1	12	2	1	3
WB-01870	【短视频平台的流量机制】又上热搜了，看评论区真的什么声音都有。	1	1	12	4	3	1
WB-01871	【知识付费是否值得】又上热搜了，看评论区真的什么声音都有。	1	3	31	4	2	2
WB-01872	【女性议题与舆论分化】又上热搜了，看评论区真的什么声音都有。	1	3	32	3	1	2
WB-01873	不得不说，【城市生活成本上升】最近的讨论热度确实有点夸张。	1	3	32	4	1	3
WB-01874	【AI写作与创作者焦虑】又上热搜了，看评论区真的什么声音都有。	1	2	22	1	1	1
WB-01875	【明星塌房后的舆论反转】又上热搜了，看评论区真的什么声音都有。	1	1	12	4	3	4
WB-01876	【网红带货翻车事件】又上热搜了，看评论区真的什么声音都有。	1	3	31	1	2	1
WB-01877	【影视改编争议】又上热搜了，看评论区真的什么声音都有。	1	1	11	2	1	2
WB-01878	关于【网络暴力与理性讨论】这件事，大家关注点好像越来越偏了。	1	3	33	4	3	2
WB-01879	【年轻人就业与内卷】又上热搜了，看评论区真的什么声音都有。	1	1	12	3	1	3
WB-01880	【读书博主推荐争议】又上热搜了，看评论区真的什么声音都有。	1	3	31	4	2	1
WB-01881	【短视频平台的流量机制】又上热搜了，看评论区真的什么声音都有。	1	1	13	3	3	3
WB-01882	关于【影视改编争议】这件事，大家关注点好像越来越偏了。	1	1	12	3	1	2
WB-01883	这两天刷到不少关于【影视改编争议】的讨论，说实话还挺唏嘘的。	1	1	11	3	2	1
WB-01884	不得不说，【知识付费是否值得】最近的讨论热度确实有点夸张。	1	1	14	3	1	4
WB-01885	【读书博主推荐争议】又上热搜了，看评论区真的什么声音都有。	1	3	31	1	3	4
WB-01886	不得不说，【网红带货翻车事件】最近的讨论热度确实有点夸张。	1	1	12	3	2	2
WB-01887	关于【公共事件中的信息透明度】这件事，大家关注点好像越来越偏了。	1	1	11	2	2	2
WB-01888	【短视频平台的流量机制】又上热搜了，看评论区真的什么声音都有。	1	2	22	1	1	1
WB-01889	不得不说，【年度爆款综艺】最近的讨论热度确实有点夸张。	1	2	22	1	3	1
WB-01890	不得不说，【情绪价值消费】最近的讨论热度确实有点夸张。	1	3	31	1	1	4
WB-01891	关于【平台算法推荐问题】这件事，大家关注点好像越来越偏了。	1	1	11	2	2	2
WB-01892	这两天刷到不少关于【女性议题与舆论分化】的讨论，说实话还挺唏嘘的。	1	2	24	4	2	2
WB-01893	这两天刷到不少关于【年度爆款综艺】的讨论，说实话还挺唏嘘的。	1	3	31	4	3	1
WB-01894	这两天刷到不少关于【知识付费是否值得】的讨论，说实话还挺唏嘘的。	1	2	23	2	3	3
WB-01895	【明星塌房后的舆论反转】又上热搜了，看评论区真的什么声音都有。	1	1	14	4	3	1
WB-01896	【网络暴力与理性讨论】又上热搜了，看评论区真的什么声音都有。	1	3	33	1	3	3
WB-01897	【女性议题与舆论分化】又上热搜了，看评论区真的什么声音都有。	1	2	21	4	1	2
WB-01898	关于【女性议题与舆论分化】这件事，大家关注点好像越来越偏了。	1	1	12	1	3	2
WB-01899	这两天刷到不少关于【情绪价值消费】的讨论，说实话还挺唏嘘的。	1	3	32	1	1	3
WB-01900	关于【年轻人就业与内卷】这件事，大家关注点好像越来越偏了。	1	2	23	3	3	2
WB-01901	这两天刷到不少关于【知识付费是否值得】的讨论，说实话还挺唏嘘的。	1	2	21	1	1	1
WB-01902	这两天刷到不少关于【读书博主推荐争议】的讨论，说实话还挺唏嘘的。	1	1	11	3	2	1
WB-01903	不得不说，【短视频平台的流量机制】最近的讨论热度确实有点夸张。	1	2	23	2	1	1
WB-01904	【公共事件中的信息透明度】又上热搜了，看评论区真的什么声音都有。	1	3	31	3	3	3
WB-01905	不得不说，【影视改编争议】最近的讨论热度确实有点夸张。	1	1	13	1	2	3
WB-01906	关于【网络暴力与理性讨论】这件事，大家关注点好像越来越偏了。	1	2	21	4	3	1
WB-01907	关于【女性议题与舆论分化】这件事，大家关注点好像越来越偏了。	1	2	22	2	2	3
WB-01908	不得不说，【年轻人就业与内卷】最近的讨论热度确实有点夸张。	1	2	24	2	1	4
WB-01909	这两天刷到不少关于【情绪价值消费】的讨论，说实话还挺唏嘘的。	1	1	14	4	2	1
WB-01910	关于【年轻人就业与内卷】这件事，大家关注点好像越来越偏了。	1	1	13	3	2	4
WB-01911	这两天刷到不少关于【网红带货翻车事件】的讨论，说实话还挺唏嘘的。	1	2	24	2	1	3
WB-01912	不得不说，【公共事件中的信息透明度】最近的讨论热度确实有点夸张。	1	3	33	2	1	3
WB-01913	不得不说，【平台算法推荐问题】最近的讨论热度确实有点夸张。	1	1	12	1	3	3
WB-01914	关于【读书博主推荐争议】这件事，大家关注点好像越来越偏了。	1	3	33	1	2	2
WB-01915	这两天刷到不少关于【国产剧质量讨论】的讨论，说实话还挺唏嘘的。	1	2	23	3	2	1
WB-01916	关于【平台算法推荐问题】这件事，大家关注点好像越来越偏了。	1	2	22	3	1	3
WB-01917	不得不说，【知识付费是否值得】最近的讨论热度确实有点夸张。	1	3	33	3	1	1
WB-01918	不得不说，【网络暴力与理性讨论】最近的讨论热度确实有点夸张。	1	3	31	1	2	2
WB-01919	不得不说，【平台算法推荐问题】最近的讨论热度确实有点夸张。	1	2	23	2	3	2
WB-01920	【情绪价值消费】又上热搜了，看评论区真的什么声音都有。	1	1	14	2	2	4
WB-01921	关于【影视改编争议】这件事，大家关注点好像越来越偏了。	1	2	21	1	1	4
WB-01922	【知识付费是否值得】又上热搜了，看评论区真的什么声音都有。	1	1	12	1	3	4
WB-01923	【短视频平台的流量机制】又上热搜了，看评论区真的什么声音都有。	1	3	33	4	2	1
WB-01924	关于【影视改编争议】这件事，大家关注点好像越来越偏了。	1	2	22	2	2	2
WB-01925	不得不说，【网红带货翻车事件】最近的讨论热度确实有点夸张。	1	3	31	4	1	2
WB-01926	【国产剧质量讨论】又上热搜了，看评论区真的什么声音都有。	1	3	31	4	3	2
WB-01927	这两天刷到不少关于【年轻人就业与内卷】的讨论，说实话还挺唏嘘的。	1	2	23	3	2	3
WB-01928	不得不说，【平台算法推荐问题】最近的讨论热度确实有点夸张。	1	2	22	2	3	3
WB-01929	这两天刷到不少关于【读书博主推荐争议】的讨论，说实话还挺唏嘘的。	1	2	22	4	2	3
WB-01930	不得不说，【国产剧质量讨论】最近的讨论热度确实有点夸张。	1	3	33	1	3	3
WB-01931	关于【短视频平台的流量机制】这件事，大家关注点好像越来越偏了。	1	1	11	1	3	2
WB-01932	关于【AI写作与创作者焦虑】这件事，大家关注点好像越来越偏了。	1	2	23	4	1	2
WB-01933	关于【女性议题与舆论分化】这件事，大家关注点好像越来越偏了。	1	2	22	2	3	1
WB-01934	关于【网红带货翻车事件】这件事，大家关注点好像越来越偏了。	1	2	21	2	2	4
WB-01935	关于【女性议题与舆论分化】这件事，大家关注点好像越来越偏了。	1	3	32	2	2	1
WB-01936	【影视改编争议】又上热搜了，看评论区真的什么声音都有。	1	3	32	3	2	4
WB-01937	这两天刷到不少关于【平台算法推荐问题】的讨论，说实话还挺唏嘘的。	1	1	12	4	1	2
WB-01938	不得不说，【平台算法推荐问题】最近的讨论热度确实有点夸张。	1	2	22	2	1	1
WB-01939	不得不说，【网络暴力与理性讨论】最近的讨论热度确实有点夸张。	1	2	23	1	1	3
WB-01940	关于【短视频平台的流量机制】这件事，大家关注点好像越来越偏了。	1	2	23	3	3	4
WB-01941	这两天刷到不少关于【明星塌房后的舆论反转】的讨论，说实话还挺唏嘘的。	1	2	22	2	1	4
WB-01942	这两天刷到不少关于【知识付费是否值得】的讨论，说实话还挺唏嘘的。	1	3	31	4	1	4
WB-01943	这两天刷到不少关于【平台算法推荐问题】的讨论，说实话还挺唏嘘的。	1	2	23	4	2	2
WB-01944	【国产剧质量讨论】又上热搜了，看评论区真的什么声音都有。	1	2	24	4	1	1
WB-01945	不得不说，【短视频平台的流量机制】最近的讨论热度确实有点夸张。	1	1	14	3	1	2
WB-01946	【网红带货翻车事件】又上热搜了，看评论区真的什么声音都有。	1	2	22	3	1	1
WB-01947	这两天刷到不少关于【知识付费是否值得】的讨论，说实话还挺唏嘘的。	1	3	32	3	1	4
WB-01948	这两天刷到不少关于【情绪价值消费】的讨论，说实话还挺唏嘘的。	1	3	32	2	3	1
WB-01949	不得不说，【年轻人就业与内卷】最近的讨论热度确实有点夸张。	1	3	32	1	3	4
WB-01950	不得不说，【读书博主推荐争议】最近的讨论热度确实有点夸张。	1	1	13	1	2	2
WB-01951	不得不说，【公共事件中的信息透明度】最近的讨论热度确实有点夸张。	1	3	32	2	3	3
WB-01952	不得不说，【平台算法推荐问题】最近的讨论热度确实有点夸张。	1	3	31	4	1	1
WB-01953	这两天刷到不少关于【情绪价值消费】的讨论，说实话还挺唏嘘的。	1	3	31	2	3	4
WB-01954	这两天刷到不少关于【平台算法推荐问题】的讨论，说实话还挺唏嘘的。	1	1	11	3	3	4
WB-01955	不得不说，【明星塌房后的舆论反转】最近的讨论热度确实有点夸张。	1	1	13	4	3	1
WB-01956	关于【AI写作与创作者焦虑】这件事，大家关注点好像越来越偏了。	1	3	33	1	1	2
WB-01957	这两天刷到不少关于【网络暴力与理性讨论】的讨论，说实话还挺唏嘘的。	1	1	11	1	3	4
WB-01958	关于【明星塌房后的舆论反转】这件事，大家关注点好像越来越偏了。	1	3	31	2	1	4
WB-01959	关于【影视改编争议】这件事，大家关注点好像越来越偏了。	1	1	11	3	1	2
WB-01960	【平台算法推荐问题】又上热搜了，看评论区真的什么声音都有。	1	2	21	3	3	1
WB-01961	【影视改编争议】又上热搜了，看评论区真的什么声音都有。	1	2	24	1	3	4
WB-01962	【女性议题与舆论分化】又上热搜了，看评论区真的什么声音都有。	1	2	22	1	1	1
WB-01963	不得不说，【国产剧质量讨论】最近的讨论热度确实有点夸张。	1	1	12	2	2	2
WB-01964	【短视频平台的流量机制】又上热搜了，看评论区真的什么声音都有。	1	2	22	4	2	2
WB-01965	【网红带货翻车事件】又上热搜了，看评论区真的什么声音都有。	1	1	14	2	3	3
WB-01966	不得不说，【国产剧质量讨论】最近的讨论热度确实有点夸张。	1	1	12	4	1	3
WB-01967	这两天刷到不少关于【短视频平台的流量机制】的讨论，说实话还挺唏嘘的。	1	1	14	3	3	4
WB-01968	不得不说，【城市生活成本上升】最近的讨论热度确实有点夸张。	1	2	21	4	2	4
WB-01969	关于【年度爆款综艺】这件事，大家关注点好像越来越偏了。	1	2	24	2	2	1
WB-01970	不得不说，【网红带货翻车事件】最近的讨论热度确实有点夸张。	1	2	23	4	1	1
WB-01971	不得不说，【公共事件中的信息透明度】最近的讨论热度确实有点夸张。	1	2	24	2	3	2
WB-01972	【知识付费是否值得】又上热搜了，看评论区真的什么声音都有。	1	1	13	3	2	2
WB-01973	不得不说，【情绪价值消费】最近的讨论热度确实有点夸张。	1	1	11	2	1	3
WB-01974	关于【读书博主推荐争议】这件事，大家关注点好像越来越偏了。	1	3	31	1	3	3
WB-01975	【国产剧质量讨论】又上热搜了，看评论区真的什么声音都有。	1	3	31	3	2	1
WB-01976	关于【情绪价值消费】这件事，大家关注点好像越来越偏了。	1	3	31	3	1	3
WB-01977	不得不说，【网络暴力与理性讨论】最近的讨论热度确实有点夸张。	1	2	24	4	2	3
WB-01978	【短视频平台的流量机制】又上热搜了，看评论区真的什么声音都有。	1	1	14	2	1	1
WB-01979	不得不说，【国产剧质量讨论】最近的讨论热度确实有点夸张。	1	1	12	1	2	1
WB-01980	不得不说，【影视改编争议】最近的讨论热度确实有点夸张。	1	1	11	3	3	2
WB-01981	这两天刷到不少关于【读书博主推荐争议】的讨论，说实话还挺唏嘘的。	1	2	23	4	2	2
WB-01982	关于【年度爆款综艺】这件事，大家关注点好像越来越偏了。	1	3	32	2	2	1
WB-01983	不得不说，【短视频平台的流量机制】最近的讨论热度确实有点夸张。	1	1	11	3	1	4
WB-01984	关于【明星塌房后的舆论反转】这件事，大家关注点好像越来越偏了。	1	2	23	4	1	1
WB-01985	不得不说，【影视改编争议】最近的讨论热度确实有点夸张。	1	2	21	1	2	4
WB-01986	不得不说，【知识付费是否值得】最近的讨论热度确实有点夸张。	1	1	13	2	1	4
WB-01987	不得不说，【公共事件中的信息透明度】最近的讨论热度确实有点夸张。	1	3	32	2	1	1
WB-01988	这两天刷到不少关于【年度爆款综艺】的讨论，说实话还挺唏嘘的。	1	2	21	1	3	3
WB-01989	这两天刷到不少关于【AI写作与创作者焦虑】的讨论，说实话还挺唏嘘的。	1	2	23	4	1	1
WB-01990	关于【情绪价值消费】这件事，大家关注点好像越来越偏了。	1	2	23	2	2	1
WB-01991	【影视改编争议】又上热搜了，看评论区真的什么声音都有。	1	1	13	4	2	2
WB-01992	关于【网红带货翻车事件】这件事，大家关注点好像越来越偏了。	1	3	32	1	3	3
WB-01993	【平台算法推荐问题】又上热搜了，看评论区真的什么声音都有。	1	2	23	4	3	1
WB-01994	这两天刷到不少关于【读书博主推荐争议】的讨论，说实话还挺唏嘘的。	1	1	14	1	1	2
WB-01995	不得不说，【平台算法推荐问题】最近的讨论热度确实有点夸张。	1	1	14	1	1	4
WB-01996	这两天刷到不少关于【明星塌房后的舆论反转】的讨论，说实话还挺唏嘘的。	1	2	23	4	1	4
WB-01997	【影视改编争议】又上热搜了，看评论区真的什么声音都有。	1	3	31	2	1	4
WB-01998	关于【年轻人就业与内卷】这件事，大家关注点好像越来越偏了。	1	2	23	3	3	3
WB-01999	关于【平台算法推荐问题】这件事，大家关注点好像越来越偏了。	1	2	22	1	1	4
[truncated: 118,001 more rows]
