# Supplementary material
Source: Research Square preprint supplement (doi:10.21203/rs.3.rs-9034779/v1)
Supplement: Supplementary file 1 [file 553c8393b272920b6c023f01.docx]

1. * PLEASE CONFIRM INSTITUTIONAL DETAILS

a: personal institutional email addresses: [tangweifen@shu.edu.cn；wln181522@usc.edu.cn](mailto:tangweifen@shu.edu.cn；wln181522@usc.edu.cn)；

b: links to their profiles on their institutional websites：<https://mp.weixin.qq.com/s/4ptXLhlUIqTtpZbJUcICpw；https://wgyxy.usc.edu.cn/info/1183/4357.htm>；

PUBLICATION LISTS FOR ALL AUTHORS: <https://kns.cnki.net/kcms2/article/abstract?v=iwDheDcO5w5mvuO8XPVs-JcS2cIUdApCH7113QWGRh95X9i_0FGTrsm6Pdul2cNgyrLJYEDnN9SucnQK9QEKh6V6YTdzygQfYX1kdogFmCWA4vB7OPdjJbW_m7WZIknImHPB-QflaUCDvEdQSNENRzvirrrKqP1-1hqUBJCYRlCTrBMR7DfpLw==&uniplatform=NZKPT&language=CHS>

DOI:10.19406/j.cnki.cqkjxyxbskb.2016.10.023.

Author contributions

All authors contributed to the study conception and design. Material preparation, data

collection and analysis were performed by W.T. (Corresponding author) and L.W.. The revised version of the manuscript was written by W.T. (Corresponding author) and L.W.; all authors commented on previous versions of the manuscript. All authors read and approved the final manuscript

<https://weibo.com/newlogin?tabtype=weibo&gid=102803&openLoginLayer=0&url=https://weibo.com/>

<https://www.zhihu.com/>

<https://www.douban.com/>
