# Supplementary material
Source: Research Square preprint supplement (doi:10.21203/rs.3.rs-9034779/v1)
Supplement: Supplementary file 2 [file c8a2df1dd5bef47b92c15cc2.docx]

**1. 前期准备：环境配置与基础工具类**

首先安装依赖库，并编写代理池、User-Agent池基础工具。

| Bash # 安装核心依赖 pip install requests scrapy beautifulsoup4 pandas numpy fake-useragent |
| --- |

| Python # 基础工具类：代理池、User-Agent池、关键词池 import random import pandas as pd from fake_useragent import UserAgent  # 1. 关键词池配置（匹配你描述的20个核心+80个长尾） KEYWORD_POOL = {  "公共政策类": ["医保改革", "双减政策", "乡村振兴", "..."], # 补充至核心关键词  "文化事件类": ["春节档电影", "非遗保护", "博物馆热", "..."],  "社会现象类": ["直播带货", "银发经济", "职场内卷", "..."],  "长尾关键词": ["2025医保改革细则", "三四线城市直播带货", "..."] # 补充至80个 }  # 2. User-Agent池 class UserAgentPool:  def __init__(self):  self.ua = UserAgent()  self.user_agents = [self.ua.chrome, self.ua.firefox, self.ua.safari]    def get_random_ua(self):  return random.choice(self.user_agents)  # 3. 简易代理池（实际使用需替换为可用代理） class ProxyPool:  def __init__(self):  self.proxies = [  {"http": "http://127.0.0.1:8888", "https": "https://127.0.0.1:8888"},  # 补充更多可用代理  ]    def get_random_proxy(self):  return random.choice(self.proxies) if self.proxies else None  # 初始化工具 ua_pool = UserAgentPool() proxy_pool = ProxyPool() |
| --- |

**2. 自动化爬取：多平台爬虫框架**

| Python # 多平台数据爬取核心代码 import requests import json from bs4 import BeautifulSoup import time  class MultiPlatformSpider:  def __init__(self):  self.headers = {"User-Agent": ua_pool.get_random_ua()}  self.data_list = [] # 存储爬取的原始数据    # 微博爬取：解析移动端API  def crawl_weibo(self, keyword, page_num=10):  """  爬取微博数据  :param keyword: 爬取关键词  :param page_num: 爬取页数  """  base_url = "https://m.weibo.cn/api/container/getIndex"  for page in range(1, page_num+1):  params = {  "containerid": f"100103type=1&q={keyword}",  "page_type": "searchall",  "page": page  }  try:  # 使用代理和随机UA  response = requests.get(  base_url,  params=params,  headers=self.headers,  proxies=proxy_pool.get_random_proxy(),  timeout=10  )  if response.status_code == 200:  data = response.json()  self.parse_weibo_data(data, keyword)  time.sleep(random.uniform(1, 3)) # 反爬：随机延迟  except Exception as e:  print(f"微博爬取失败（关键词：{keyword}，页码：{page}）：{e}")    # 解析微博JSON数据  def parse_weibo_data(self, json_data, keyword):  if "data" in json_data and "cards" in json_data["data"]:  for card in json_data["data"]["cards"]:  if "mblog" in card:  mblog = card["mblog"]  # 提取你指定的字段  item = {  "文本内容": mblog.get("text", ""),  "发布时间": mblog.get("created_at", ""),  "平台类型": "微博",  "话题标签": [tag["name"] for tag in mblog.get("tags", [])],  "互动对象": mblog.get("user", {}).get("screen_name", ""),  "点赞数": mblog.get("attitudes_count", 0),  "评论数": mblog.get("comments_count", 0),  "爬取关键词": keyword  }  self.data_list.append(item)    # 知乎爬取：HTML解析+API  def crawl_zhihu(self, keyword, page_num=5):  """爬取知乎相关回答/文章"""  base_url = f"https://www.zhihu.com/search?q={keyword}"  for page in range(1, page_num+1):  try:  response = requests.get(  base_url,  params={"page": page},  headers=self.headers,  proxies=proxy_pool.get_random_proxy(),  timeout=15  )  soup = BeautifulSoup(response.text, "html.parser")  self.parse_zhihu_html(soup, keyword)  time.sleep(random.uniform(2, 4))  except Exception as e:  print(f"知乎爬取失败（关键词：{keyword}，页码：{page}）：{e}")    def parse_zhihu_html(self, soup, keyword):  # 解析知乎搜索结果的核心字段（需根据页面结构调整）  items = soup.find_all("div", class_="List-item")  for item in items:  content = item.find("span", class_="RichText ztext")  publish_time = item.find("span", class_="ContentItem-time")  item_data = {  "文本内容": content.get_text().strip() if content else "",  "发布时间": publish_time.get_text().strip() if publish_time else "",  "平台类型": "知乎",  "话题标签": [keyword],  "互动对象": "", # 可补充解析答主名称  "点赞数": 0, # 可补充解析点赞数  "评论数": 0, # 可补充解析评论数  "爬取关键词": keyword  }  self.data_list.append(item_data)    # 保存原始数据  def save_raw_data(self, file_path="raw_data.csv"):  """将爬取的原始数据保存为CSV"""  df = pd.DataFrame(self.data_list)  df.to_csv(file_path, index=False, encoding="utf-8-sig")  print(f"原始数据已保存，共{len(df)}条")  return df  # 爬虫使用示例 if __name__ == "__main__":  spider = MultiPlatformSpider()  # 遍历关键词池爬取（此处仅示例，实际需分批爬取所有关键词）  for key_type, keywords in KEYWORD_POOL.items():  if key_type != "长尾关键词": # 先爬核心关键词  for keyword in keywords[:2]: # 示例仅爬前2个，实际替换为全部  spider.crawl_weibo(keyword, page_num=5)  spider.crawl_zhihu(keyword, page_num=3)  # 保存原始数据  raw_df = spider.save_raw_data() |
| --- |

**3. 自动化初筛：数据清洗脚本**

| Python # 自动化数据清洗脚本 import re import pandas as pd  class DataCleaner:  def __init__(self, raw_data_path):  # 读取原始数据  self.raw_df = pd.read_csv(raw_data_path, encoding="utf-8-sig")  # 定义垃圾信息关键词（匹配你描述的"扫码关注""代购刷单"等）  self.spam_keywords = ["扫码关注", "代购刷单", "加微信", "广告", "推广", "刷单赚钱"]  # 乱码/无意义字符正则  self.gibberish_pattern = re.compile(r"^[\s\u3000\u0020\u00a0]*$|^[\W_]*$")    def clean_data(self):  """执行自动化初筛"""  df = self.raw_df.copy()  print(f"清洗前原始数据量：{len(df)}")    # 1. 剔除过短文本（字数<10字）  df["文本长度"] = df["文本内容"].astype(str).apply(lambda x: len(x.strip()))  df = df[df["文本长度"] >= 10]    # 2. 剔除含垃圾信息关键词的文本  def contains_spam(text):  text = str(text).lower()  return any(spam in text for spam in self.spam_keywords)  df = df[~df["文本内容"].apply(contains_spam)]    # 3. 剔除乱码/无意义字符  df = df[~df["文本内容"].astype(str).apply(lambda x: bool(self.gibberish_pattern.match(x.strip())))]    # 4. 剔除重复内容  df = df.drop_duplicates(subset=["文本内容"], keep="first")    # 重置索引  df = df.reset_index(drop=True)  print(f"自动化初筛后有效数据量：{len(df)}")    # 保存初筛结果  df.to_csv("cleaned_data.csv", index=False, encoding="utf-8-sig")  return df    # 计算有效数据率  def calculate_efficiency_rate(self, cleaned_df):  raw_count = len(self.raw_df)  cleaned_count = len(cleaned_df)  efficiency_rate = (cleaned_count / raw_count) * 100  print(f"自动化初筛有效数据率：{efficiency_rate:.2f}%")  return efficiency_rate  # 清洗脚本使用示例 if __name__ == "__main__":  cleaner = DataCleaner("raw_data.csv")  cleaned_df = cleaner.clean_data()  # 计算有效数据率  cleaner.calculate_efficiency_rate(cleaned_df) |
| --- |

**4. 人工精筛辅助工具+统计分析**

人工精筛可基于初筛后的CSV文件进行标注，此处提供标注后的数据统计分析代码，包括各类型关键词占比、平台分布、互动量分析等。

| Python # 数据统计分析脚本 import pandas as pd import numpy as np import matplotlib.pyplot as plt  # 设置中文字体（避免乱码） plt.rcParams["font.sans-serif"] = ["SimHei"] plt.rcParams["axes.unicode_minus"] = False  class DataAnalyzer:  def __init__(self, final_data_path):  # 读取人工精筛后的最终数据（需在cleaned_data.csv基础上添加"人工标注结果"列）  self.final_df = pd.read_csv(final_data_path, encoding="utf-8-sig")  # 关键词映射（用于统计各类型占比）  self.keyword_to_type = {}  for type_name, keywords in KEYWORD_POOL.items():  for kw in keywords:  self.keyword_to_type[kw] = type_name    # 1. 统计各类型关键词文本占比  def analyze_keyword_type_distribution(self):  # 匹配文本对应的关键词类型  def get_keyword_type(row):  crawl_kw = row["爬取关键词"]  return self.keyword_to_type.get(crawl_kw, "其他")    self.final_df["关键词类型"] = self.final_df.apply(get_keyword_type, axis=1)  type_count = self.final_df["关键词类型"].value_counts()  type_ratio = (type_count / len(self.final_df)) * 100    # 可视化  plt.figure(figsize=(10, 6))  type_ratio.plot(kind="pie", autopct="%1.2f%%", title="各类型关键词文本占比")  plt.ylabel("")  plt.savefig("keyword_type_distribution.png", dpi=300, bbox_inches="tight")  plt.show()    return type_ratio    # 2. 统计平台分布  def analyze_platform_distribution(self):  platform_count = self.final_df["平台类型"].value_counts()  platform_ratio = (platform_count / len(self.final_df)) * 100    plt.figure(figsize=(8, 5))  platform_ratio.plot(kind="bar", title="各平台有效文本分布")  plt.xlabel("平台")  plt.ylabel("占比（%）")  plt.savefig("platform_distribution.png", dpi=300, bbox_inches="tight")  plt.show()    return platform_ratio    # 3. 计算整体有效数据率（原始→人工精筛）  def calculate_final_efficiency_rate(self, raw_data_path):  raw_df = pd.read_csv(raw_data_path, encoding="utf-8-sig")  final_count = len(self.final_df)  raw_count = len(raw_df)  final_rate = (final_count / raw_count) * 100  print(f"最终有效数据率（原始→人工精筛）：{final_rate:.2f}%")  return final_rate    # 4. 互动量（点赞/评论）统计  def analyze_interaction(self):  interaction_stats = {  "平均点赞数": self.final_df["点赞数"].mean(),  "平均评论数": self.final_df["评论数"].mean(),  "点赞数中位数": self.final_df["点赞数"].median(),  "评论数中位数": self.final_df["评论数"].median()  }  print("互动量统计：")  for key, value in interaction_stats.items():  print(f"{key}：{value:.2f}")  return interaction_stats  # 分析脚本使用示例 if __name__ == "__main__":  analyzer = DataAnalyzer("final_data.csv") # final_data.csv是人工精筛后的文件  # 统计关键词类型占比  analyzer.analyze_keyword_type_distribution()  # 统计平台分布  analyzer.analyze_platform_distribution()  # 计算最终有效数据率  analyzer.calculate_final_efficiency_rate("raw_data.csv")  # 互动量分析  analyzer.analyze_interaction() |
| --- |
